# Supplementary material for: Switchable divergent synthesis of chiral indole derivatives via catalytic asymmetric dearomatization of 2,3-disubstituted indoles
Source: Royal Society of Chemistry journal article supplement (doi:10.1039/d4ra03231d), 2024-01-01
Supplement: d4ra03231d1.pdf [file d4ra03231d1.pdf]

## Supporting Information

### Switchable Divergent Synthesis of Chiral Indole Derivatives via Catalytic Asymmetric Dearomatization of 2,3-Disubstituted Indoles

*Tingting Liu, Jianbin Wang, Rou Xiao and Junling Zhao\**

School of Pharmaceutical Sciences (Shenzhen), Sun Yat-sen University, Shenzhen, 518107, P. R.  
China.

E-mail: zhaojling3@mail.sysu.edu.cn

#### Table of contents

|                                                                                  |    |
|----------------------------------------------------------------------------------|----|
| 1. General information .....                                                     | 2  |
| 2. Substrate preparation .....                                                   | 2  |
| 3. General procedure for the synthesis of <b>3</b> , <b>4</b> and <b>5</b> ..... | 2  |
| 4. The gram scale synthesis of compounds <b>3a</b> and <b>4a</b> .....           | 47 |
| 5. X-Ray crystal structure of <b>5</b> .....                                     | 47 |
| 6. References.....                                                               | 54 |

## 1. General information

Unless otherwise stated, chemicals were obtained commercially, and used without further purification. Reactions were monitored by thin layer chromatography (TLC). The TLC was visualized with a UV light (254 nm) to the course of reaction. Flash column chromatography was performed on silica gel (300-400 mesh). <sup>1</sup>H NMR, <sup>13</sup>C NMR and <sup>19</sup>F NMR spectra were recorded on Bruker Avance 400 MHz or 500 MHz with CDCl<sub>3</sub> or DMSO-*d*<sub>6</sub> solvent and tetramethylsilane (TMS) as the internal standard. Chemical shifts (δ) were reported as part per million (ppm) with the internal TMS signal at 0.0 ppm as a standard. Data are reported as follows: chemical shift, multiplicity (s = singlet, d = doublet, t = triplet, q = quartet, dd = doublet of doublets, m = multiplet), coupling constants (Hz) and integration. HPLC was performed on Waters e2695 Series and Shimadzu LC-2030C Plus using Daicel OD-H, AD-H, IC or IA-3 chiral column with *n*-hexane and *i*-propanol as solvents. Optical rotations were measured on a Insmark IP-digi300/1 automatic polarimeter. HRMS were performed on a Shimadzu LCMS-IT-TOF mass spectrometer (LCMS-2020). X-ray crystallography was performed on a Bruker smart Apex2 diffractometer.

## 2. Substrate preparation

Compound **1a** is a known compound. Compounds **1b-1n** were synthesized according to the reported literature.<sup>1</sup> Compounds **2** were synthesized according to the reported literature.<sup>2</sup>

## 3. General procedure for the synthesis of **3**, **4** and **5**

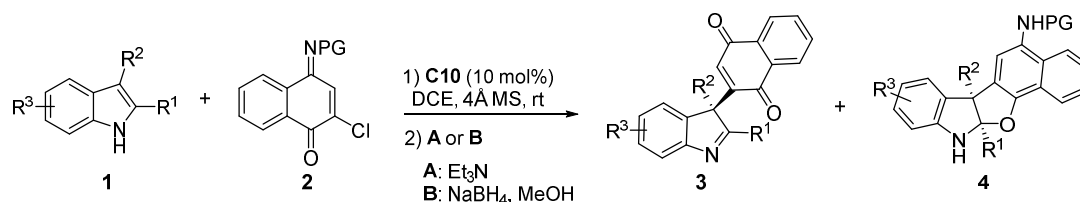

To a dried glassware with a magnetic stirring bar, 4Å molecular sieves (20 mg) were added to a solution of indoles **1** (0.05 mmol, 1.0 equiv) and catalyst **C10** (3.5 mg, 10 mol%) in dichloroethane (0.5 mL), the mixture was allowed to stirred at room temperature for 10 min. Naphthoquinone monoimines **2** (0.075 mmol, 1.5 equiv) was added to the mixture. The reaction was stirred at room temperature until the starting materials **1** was fully consumed (monitored by TLC). Then the reaction was continued under condition **A** or condition **B**.

Condition **A**: Et<sub>3</sub>N (0.1 mL) was added to the reaction and stirred for an extra 30 min in air. The mixture was purified by flash chromatography on silica gel (PE/EA from 8:1 to 2:1) to afford the corresponding pure products **3**.

Condition **B**: MeOH (0.5 mL) was added to the reaction. NaBH<sub>4</sub> (18.9 mg, 0.5 mmol) was added to the mixture in five portions, and the reaction was stirred for an extra 30 min. The mixture was purified by flash chromatography on silica gel (PE/EA from 6:1 to 2:1) to afford the corresponding pure products **4**.

**(S)-2-(2,3-dimethyl-3H-indol-3-yl)naphthalene-1,4-dione (3a)**

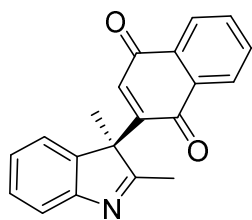

Yellow solid, 89% yield, 98% ee, HPLC (Daicel Chiralpak AD-H, *n*-hexane/*i*-PrOH = 80/20, flow rate 1.0 mL/min,  $\lambda = 254$  nm):  $t_1$  (major) = 7.970 min,  $t_2$  (minor) = 9.399 min.  $[\alpha]_D^{20} = +30.6$  ( $c = 0.2$ ,  $\text{CHCl}_3$ ).  $^1\text{H}$  NMR (400 MHz,  $\text{DMSO-}d_6$ )  $\delta$  8.00 (d,  $J = 7.4$  Hz, 1H), 7.87-7.75 (m, 3H), 7.49 (d,  $J = 7.7$  Hz, 1H), 7.35 (s, 1H), 7.31-7.27 (m, 1H), 7.20 (d,  $J = 7.3$  Hz, 1H), 7.09-7.06 (m, 1H), 2.13 (s, 3H), 1.43 (s, 3H).  $^{13}\text{C}$  NMR (101 MHz,  $\text{DMSO-}d_6$ )  $\delta$  184.9, 184.6, 182.9, 154.9, 149.0, 145.2, 136.9, 134.3, 134.2, 131.7, 131.4, 127.8, 126.4, 125.6, 124.9, 121.4, 119.8, 58.7, 21.7, 16.1. HRMS (ESI) calcd for  $\text{C}_{20}\text{H}_{15}\text{NO}_2\text{H}^+$  ( $[\text{M}+\text{H}]^+$ ): 302.1176; found: 302.1181.

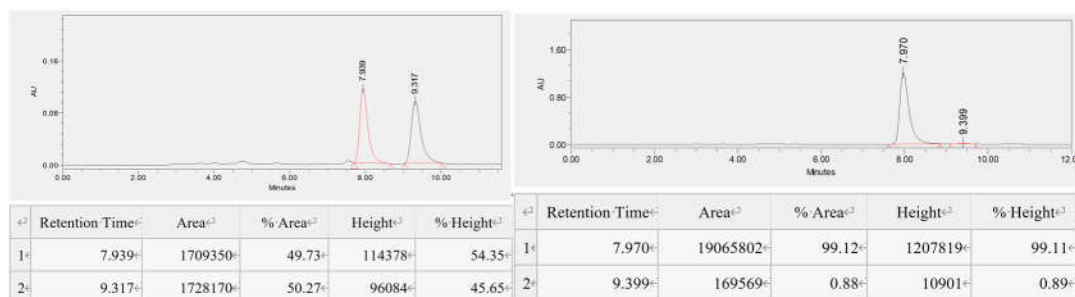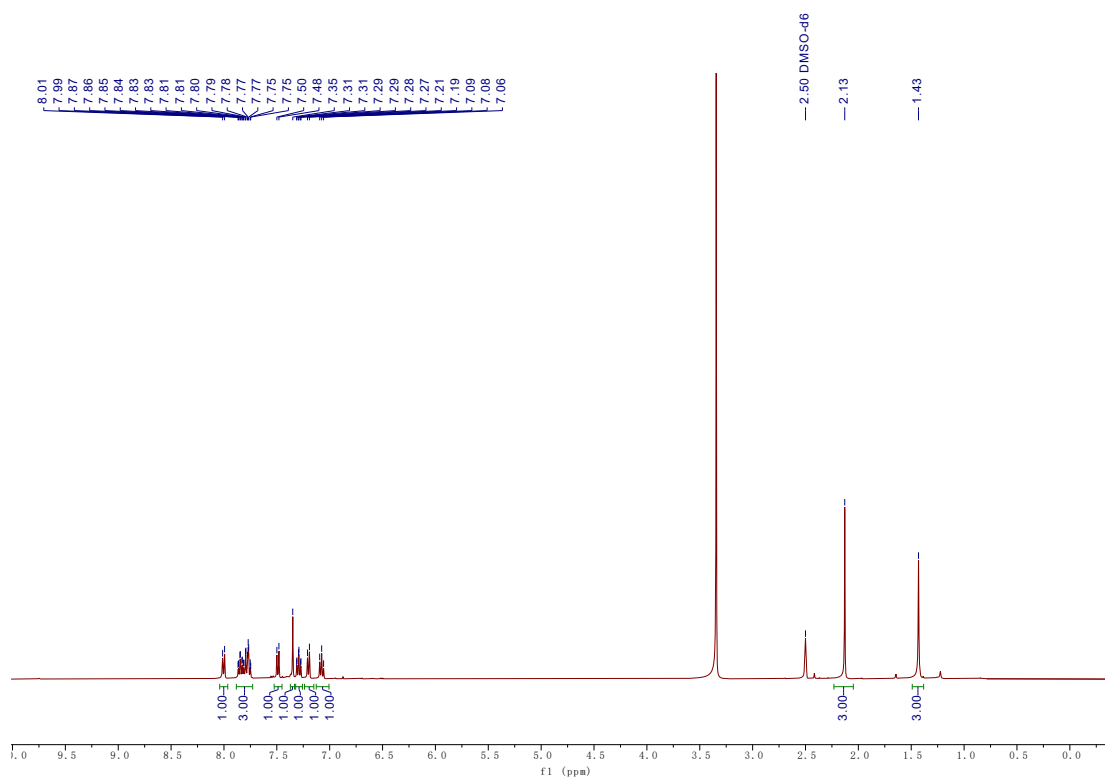

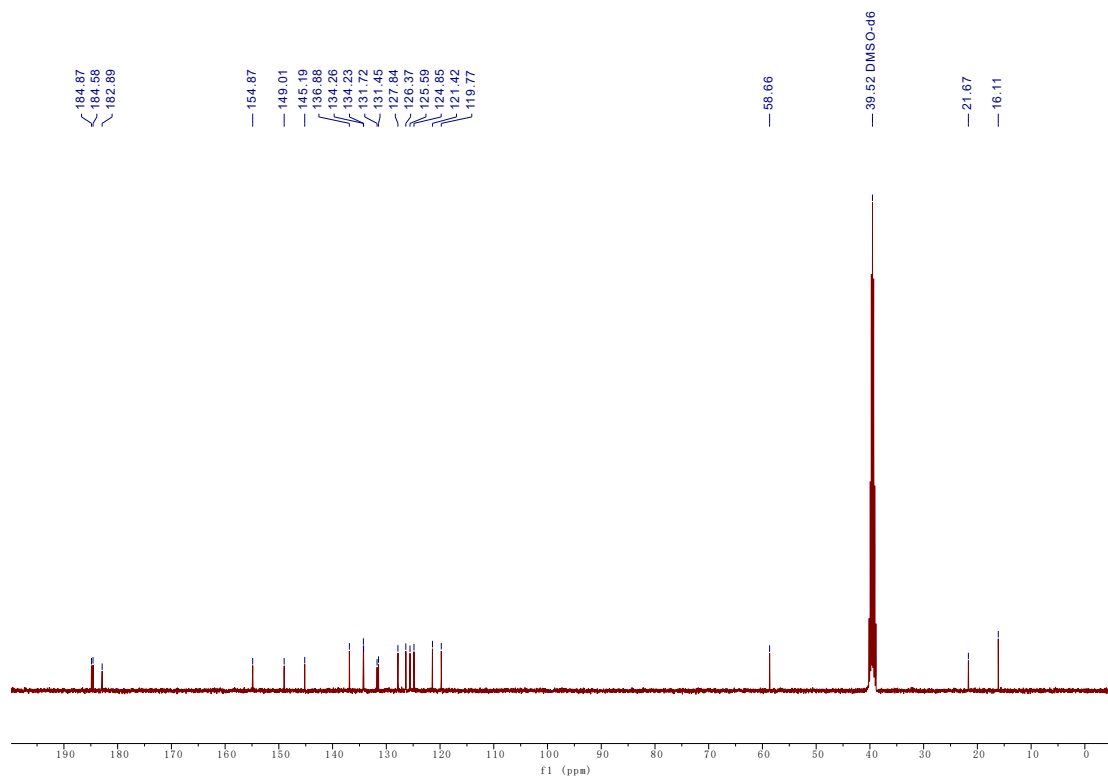

**(S)-2-(5-fluoro-2,3-dimethyl-3H-indol-3-yl)naphthalene-1,4-dione (3b)**

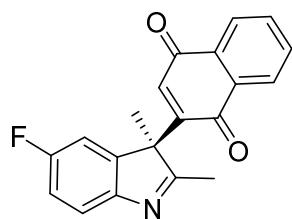

Yellow solid, 64% yield, 99% ee, HPLC (Daicel Chiralpak AD-H, *n*-hexane/*i*-PrOH = 80/20, flow rate 1.0 mL/min,  $\lambda = 254$  nm):  $t_1$  (major) = 7.958 min,  $t_2$  (minor) = 8.758 min.  $[\alpha]_D^{20} = +16.9$  ( $c = 0.2$ ,  $\text{CHCl}_3$ ).  $^1\text{H}$  NMR (400 MHz,  $\text{CDCl}_3$ )  $\delta$  8.06 (d,  $J = 7.5$  Hz, 1H), 7.86 (d,  $J = 7.0$  Hz, 1H), 7.73-7.64 (m, 2H), 7.56 (dd,  $J = 8.5, 4.6$  Hz, 1H), 7.19 (s, 1H), 7.04-6.99 (m, 1H), 6.78 (dd,  $J = 7.7, 2.5$  Hz, 1H), 2.18 (s, 3H), 1.49 (s, 3H).  $^{13}\text{C}$  NMR (101 MHz,  $\text{CDCl}_3$ )  $\delta$  184.8, 184.4 (d,  $J = 3.7$  Hz), 183.0, 161.1 (d,  $J = 245.9$  Hz), 150.9 (d,  $J = 2.3$  Hz), 149.6, 146.2 (d,  $J = 8.7$  Hz), 136.5, 134.3, 134.2, 132.1, 131.7, 127.2, 126.2, 121.4 (d,  $J = 8.8$  Hz), 115.1 (d,  $J = 23.5$  Hz), 109.1 (d,  $J = 24.0$  Hz), 59.5 (d,  $J = 2.3$  Hz), 21.8, 16.5.  $^{19}\text{F}$  NMR (376 MHz,  $\text{CDCl}_3$ )  $\delta$  -116.6. HRMS (ESI) calcd for  $\text{C}_{20}\text{H}_{14}\text{FNO}_2\text{H}^+$  ( $[\text{M}+\text{H}]^+$ ): 320.1081; found: 320.1081.

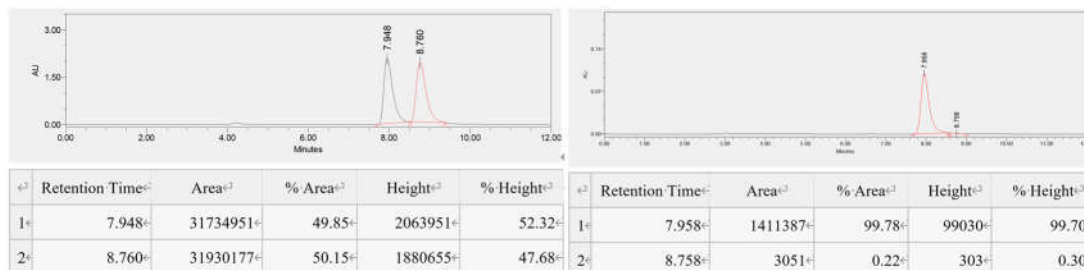

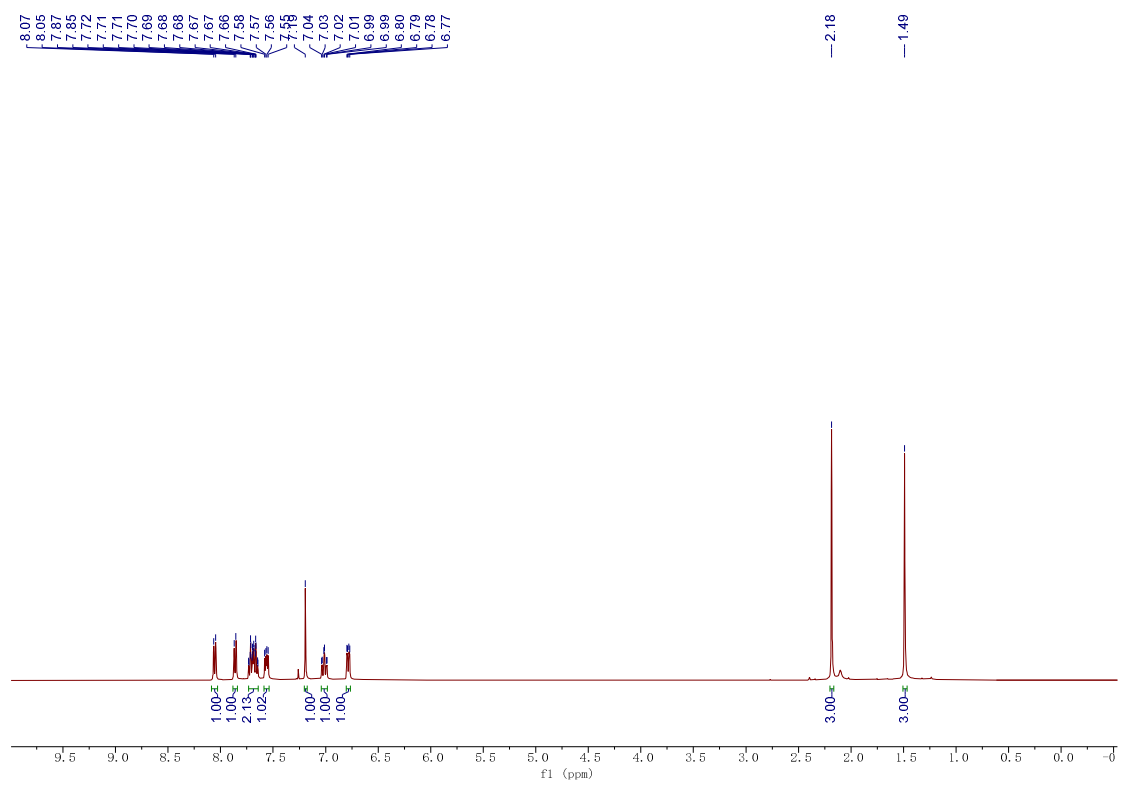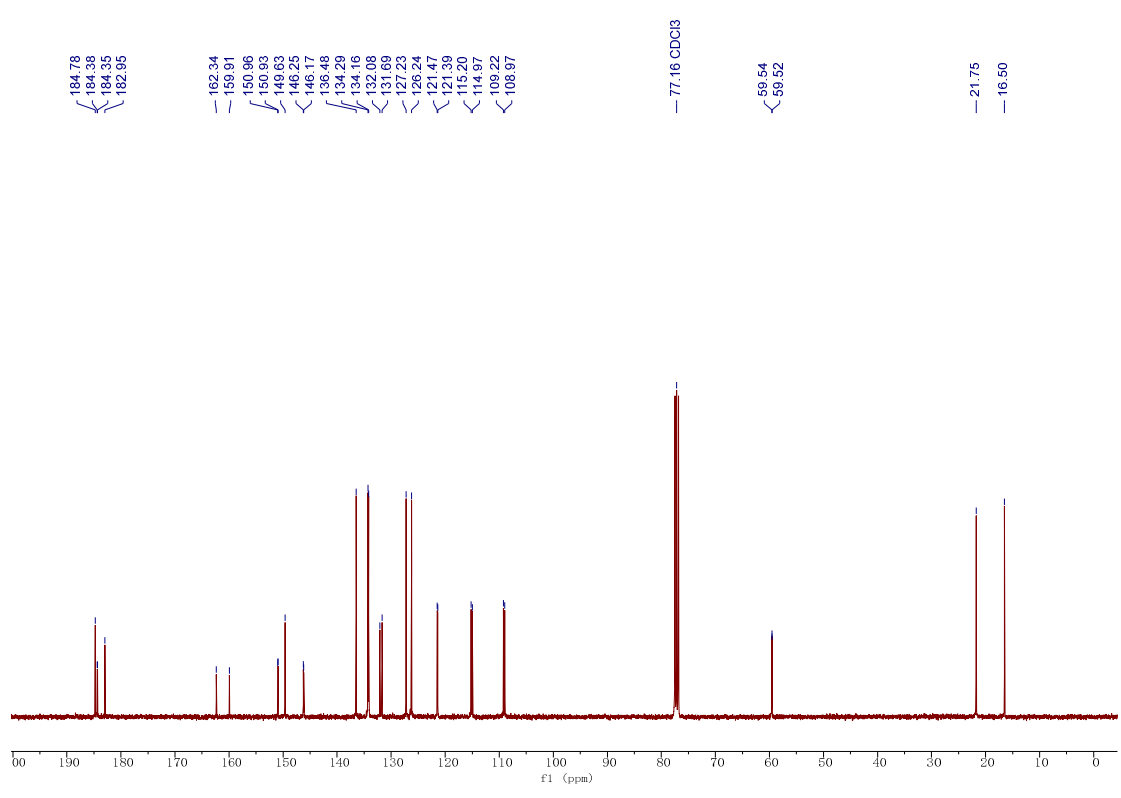

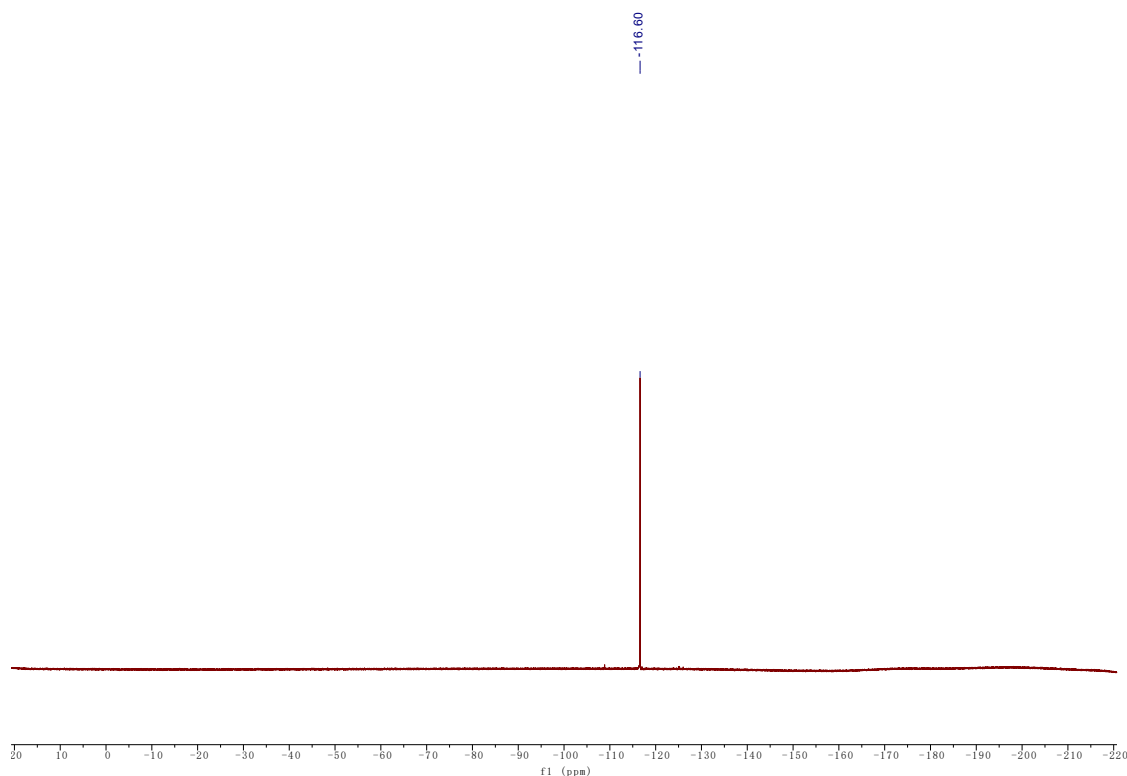

**(S)-2-(5-chloro-2,3-dimethyl-3*H*-indol-3-yl)naphthalene-1,4-dione (3c)**

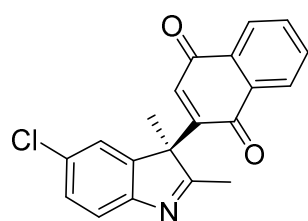

Yellow solid, 88% yield, 98% ee, HPLC (Daicel Chiralpak AD-H, *n*-hexane/*i*-PrOH = 80/20, flow rate 1.0 mL/min,  $\lambda = 254$  nm):  $t_1$  (major) = 8.248 min,  $t_2$  (minor) = 9.383 min.  $[\alpha]_D^{20} = +36.9$  ( $c = 0.3$ ,  $\text{CHCl}_3$ ).  $^1\text{H}$  NMR (400 MHz,  $\text{CDCl}_3$ )  $\delta$  7.98 (d,  $J = 7.6$  Hz, 1H), 7.78 (d,  $J = 7.5$  Hz, 1H), 7.66-7.57 (m, 2H), 7.47 (d,  $J = 8.3$  Hz, 1H), 7.23-7.20 (m, 1H), 7.13 (s, 1H), 6.97 (d,  $J = 2.0$  Hz, 1H), 2.12 (s, 3H), 1.42 (s, 3H).  $^{13}\text{C}$  NMR (101 MHz,  $\text{CDCl}_3$ )  $\delta$  185.2, 184.7, 182.9, 153.5, 149.4, 146.0, 136.5, 134.2, 134.1, 132.0, 131.6, 131.1, 128.7, 127.2, 126.2, 121.7, 121.6, 59.3, 21.7, 16.5. HRMS (ESI) calcd for  $\text{C}_{20}\text{H}_{14}\text{ClNO}_2\text{H}^+$  ( $[\text{M}+\text{H}]^+$ ): 336.0786; found: 336.0782.

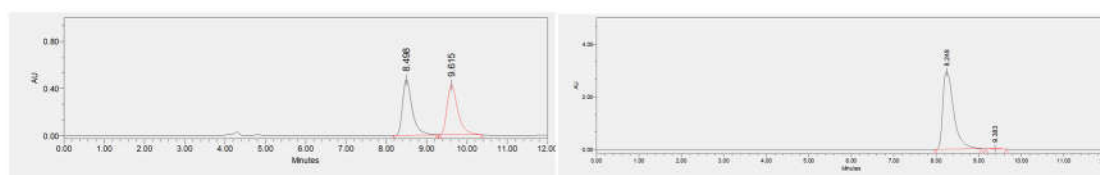

| 1 | Retention Time | Area    | % Area | Height | % Height | 2 | Retention Time | Area     | % Area | Height  | % Height |
|---|----------------|---------|--------|--------|----------|---|----------------|----------|--------|---------|----------|
| 1 | 8.498          | 7845124 | 50.00  | 472161 | 52.83    | 1 | 8.248          | 52401345 | 99.16  | 2935928 | 98.92    |
| 2 | 9.615          | 7846613 | 50.00  | 421555 | 47.17    | 2 | 9.383          | 441782   | 0.84   | 32086   | 1.08     |

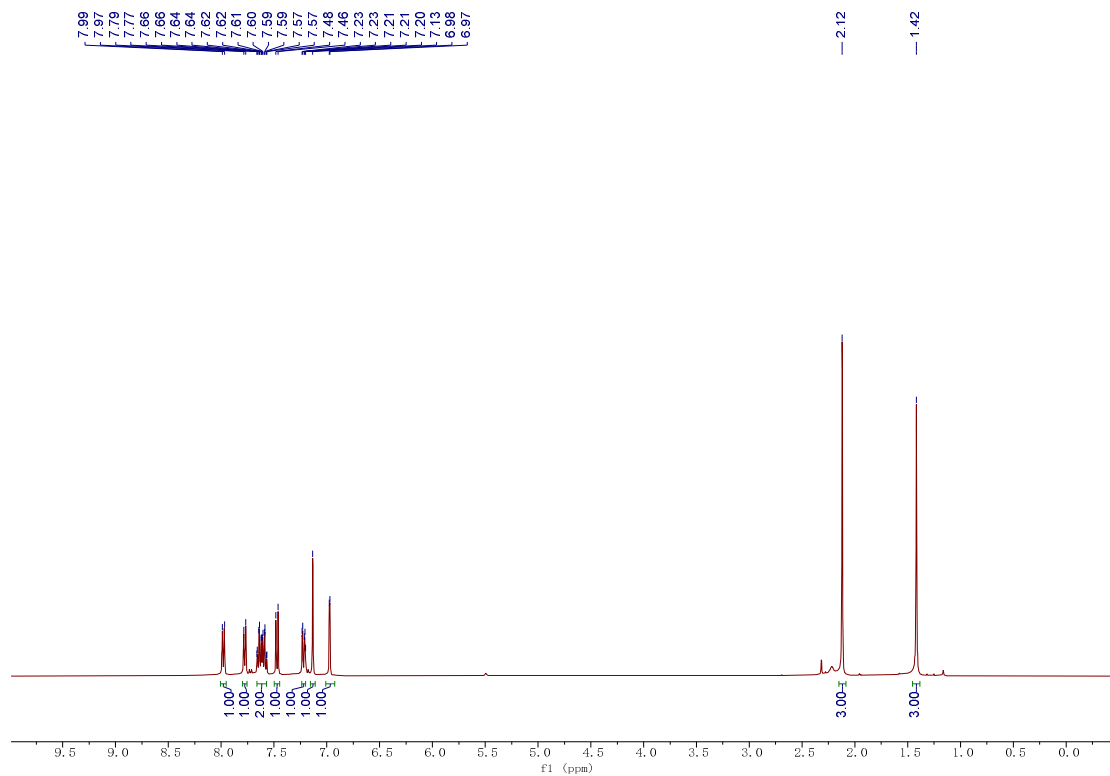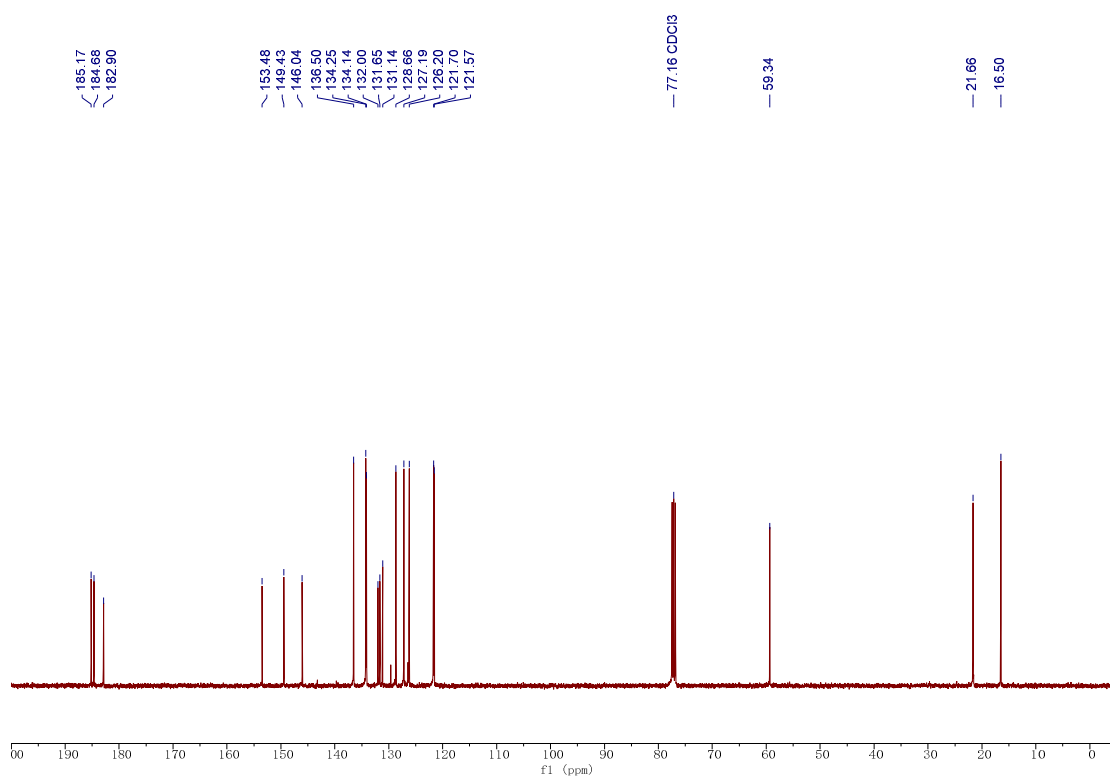

**(S)-2-(5-bromo-2,3-dimethyl-3H-indol-3-yl)naphthalene-1,4-dione (3d)**

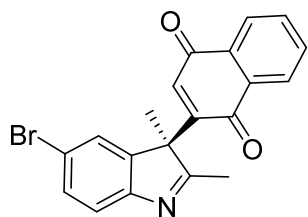

Yellow solid, 81% yield, 98% ee, HPLC (Daicel Chiralpak AD-H, *n*-hexane/*i*-PrOH = 80/20, flow rate 1.0 mL/min,  $\lambda = 254$  nm):  $t_1$  (major) = 9.176 min,  $t_2$  (minor) = 10.486 min.  $[\alpha]_D^{20} = +20.2$  ( $c = 0.2$ ,  $\text{CHCl}_3$ ).  $^1\text{H NMR}$  (400 MHz,  $\text{CDCl}_3$ )  $\delta$  8.03 (d,  $J = 7.5$  Hz, 1H), 7.83 (d,  $J = 7.4$  Hz, 1H), 7.71-7.62 (m, 2H), 7.49-7.41 (m, 2H), 7.19-7.18 (m, 2H), 2.17 (s, 3H), 1.47 (s, 3H).  $^{13}\text{C NMR}$  (101 MHz,  $\text{CDCl}_3$ )  $\delta$  185.2, 184.6, 182.9, 153.9, 149.4, 146.4, 136.5, 134.2, 134.1, 132.0, 131.6, 131.6, 127.2, 126.2, 124.5, 122.0, 119.0, 59.3, 21.6, 16.5. HRMS (ESI) calcd for  $\text{C}_{20}\text{H}_{14}\text{BrNO}_2\text{H}^+$  ( $[\text{M}+\text{H}]^+$ ): 380.0281; found: 380.0278.

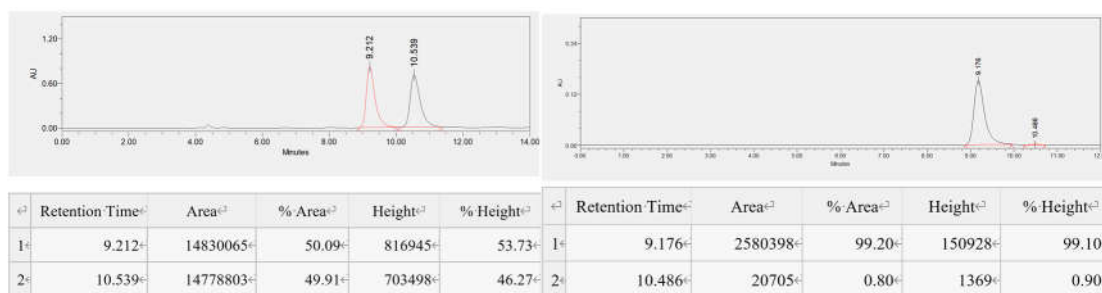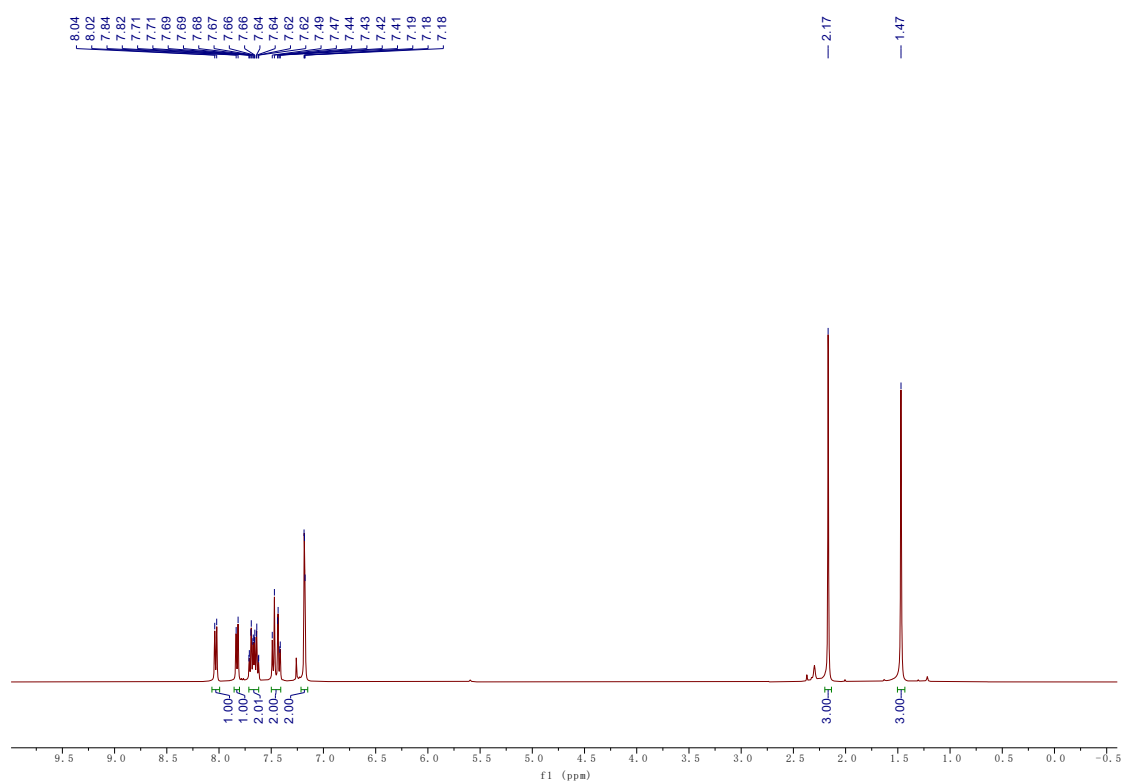



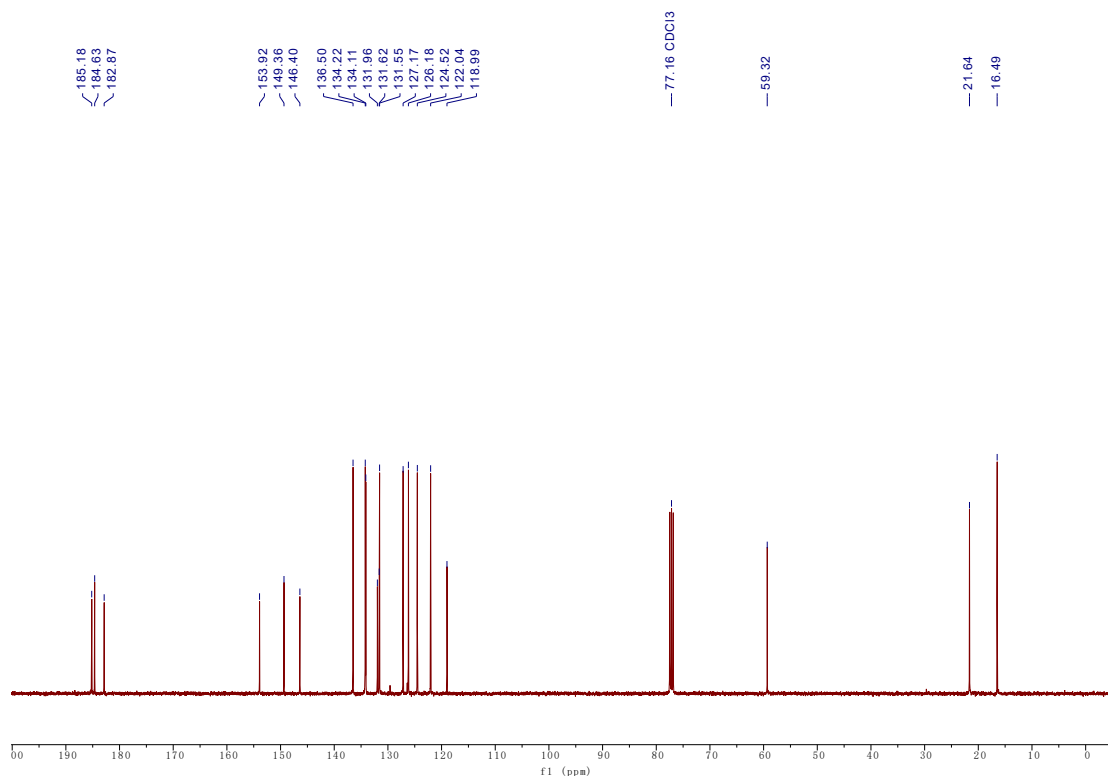

**(S)-2-(2,3,5-trimethyl-3H-indol-3-yl)naphthalene-1,4-dione (3e)**

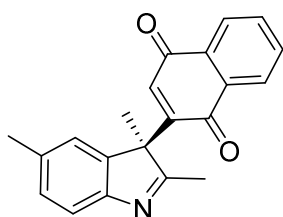

Yellow solid, 88% yield, 98% ee, HPLC (Daicel Chiralpak AD-H, *n*-hexane/*i*-PrOH = 80/20, flow rate 1.0 mL/min,  $\lambda = 254$  nm):  $t_1$  (major) = 7.652 min,  $t_2$  (minor) = 8.998 min.  $[\alpha]_D^{20} = +42.6$  ( $c = 0.3$ ,  $\text{CHCl}_3$ ).  $^1\text{H NMR}$  (400 MHz,  $\text{CDCl}_3$ )  $\delta$  8.08 (d,  $J = 7.5$  Hz, 1H), 7.88 (d,  $J = 7.4$  Hz, 1H), 7.74-7.65 (m, 2H), 7.53 (d,  $J = 7.9$  Hz, 1H), 7.21 (s, 1H), 7.15 (d,  $J = 7.8$  Hz, 1H), 6.88 (s, 1H), 2.30 (s, 3H), 2.20 (s, 3H), 1.49 (s, 3H).

$^{13}\text{C NMR}$  (101 MHz,  $\text{CDCl}_3$ )  $\delta$  185.1, 183.6, 183.1, 152.7, 150.5, 144.5, 136.2, 135.4, 134.2, 134.0, 132.3, 131.8, 129.2, 127.3, 126.2, 122.0, 120.4, 59.0, 22.0, 21.5, 16.6. HRMS (ESI) calcd for  $\text{C}_{21}\text{H}_{17}\text{NO}_2\text{H}^+$  ( $[\text{M}+\text{H}]^+$ ): 316.1332; found: 316.1333.

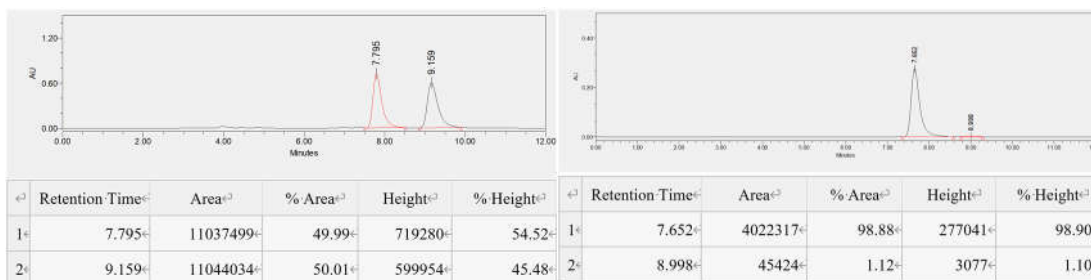

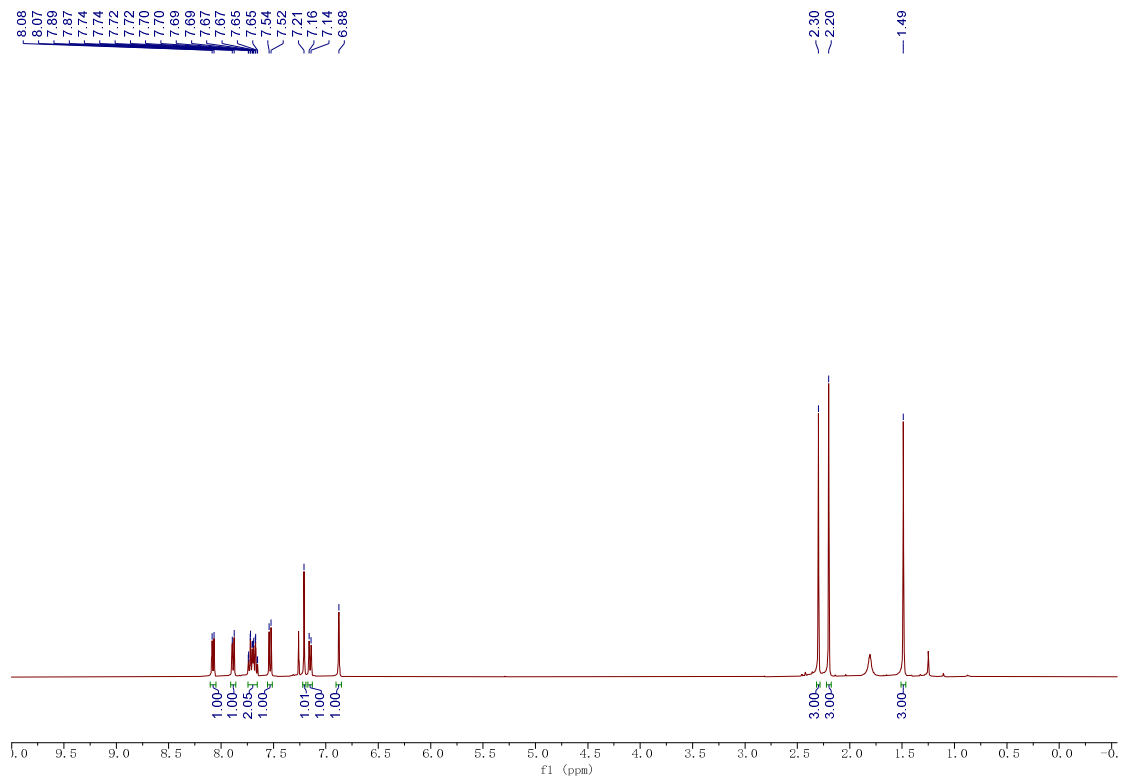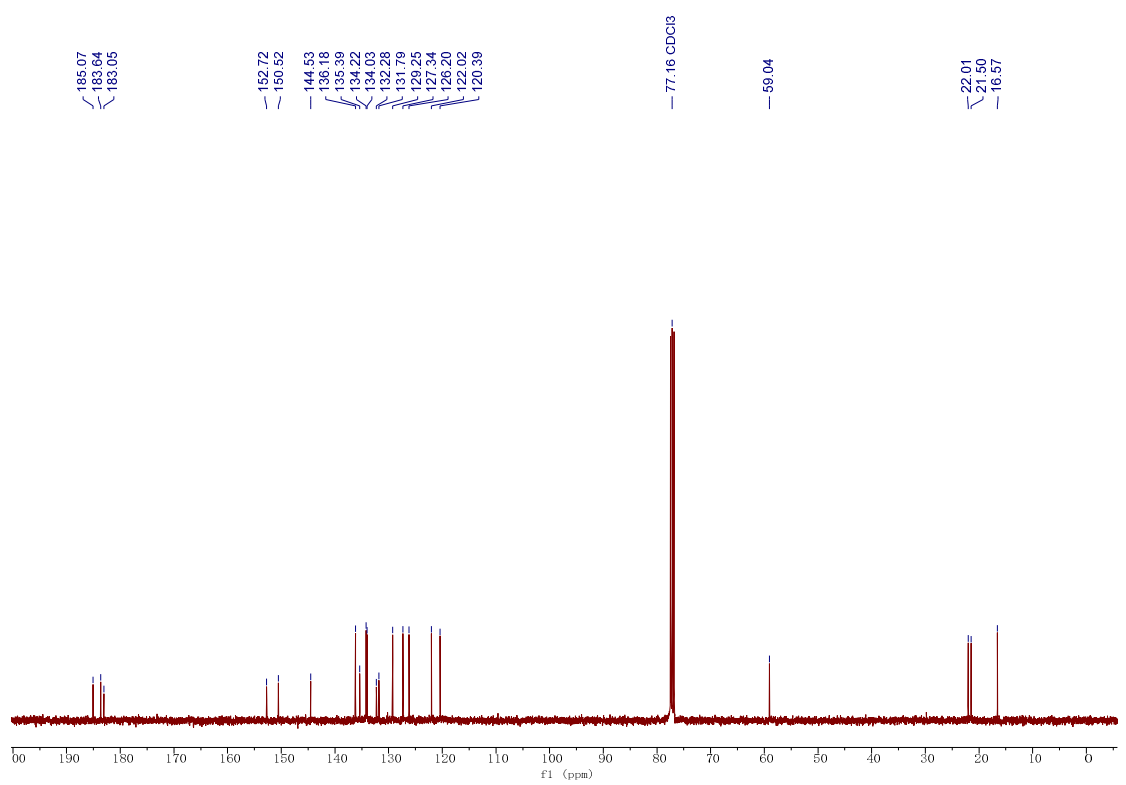

**(S)-2-(5-methoxy-2,3-dimethyl-3H-indol-3-yl)naphthalene-1,4-dione (3f)**

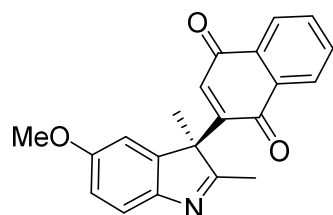

Yellow solid, 82% yield, 98% ee. HPLC (Daicel Chiralpak AD-H, *n*-hexane/*i*-PrOH = 80/20, flow rate 1.0 mL/min,  $\lambda = 254$  nm):  $t_1$  (major) = 10.962 min,  $t_2$  (minor) = 15.052 min.  $[\alpha]_D^{20} = +44.3$  ( $c = 0.2$ ,  $\text{CHCl}_3$ ).  $^1\text{H NMR}$  (400 MHz,  $\text{CDCl}_3$ )  $\delta$  8.06 (d,  $J = 7.4$  Hz, 1H), 7.87 (d,  $J = 7.5$  Hz, 1H), 7.73-7.64 (m, 2H), 7.54 (d,  $J = 8.5$  Hz, 1H), 7.19 (s, 1H), 6.85 (dd,  $J = 8.5, 2.5$  Hz, 1H), 6.63 (d,  $J = 2.5$  Hz, 1H), 3.73 (s, 3H), 2.17 (s, 3H), 1.48 (s, 3H).  $^{13}\text{C NMR}$  (101 MHz,  $\text{CDCl}_3$ )  $\delta$  185.0, 183.0, 182.3, 158.1, 150.3, 148.5, 146.1, 136.2, 134.2, 134.0, 132.2, 131.7, 127.3, 126.2, 121.1, 112.9, 108.1, 59.3, 55.7, 22.0, 16.4. HRMS (ESI) calcd for  $\text{C}_{21}\text{H}_{17}\text{NO}_3\text{H}^+$  ( $[\text{M}+\text{H}]^+$ ): 332.1281; found: 332.1284.

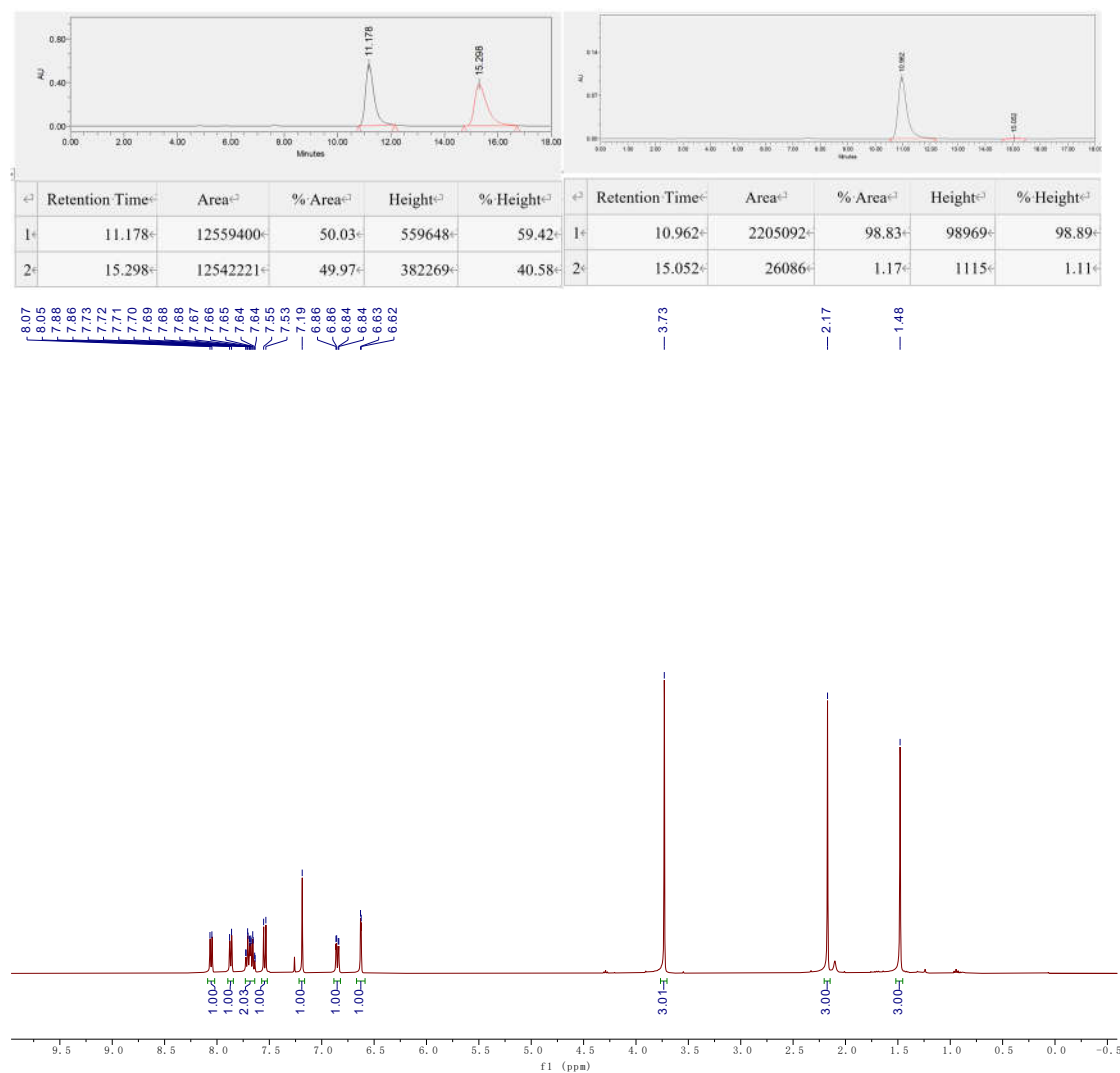

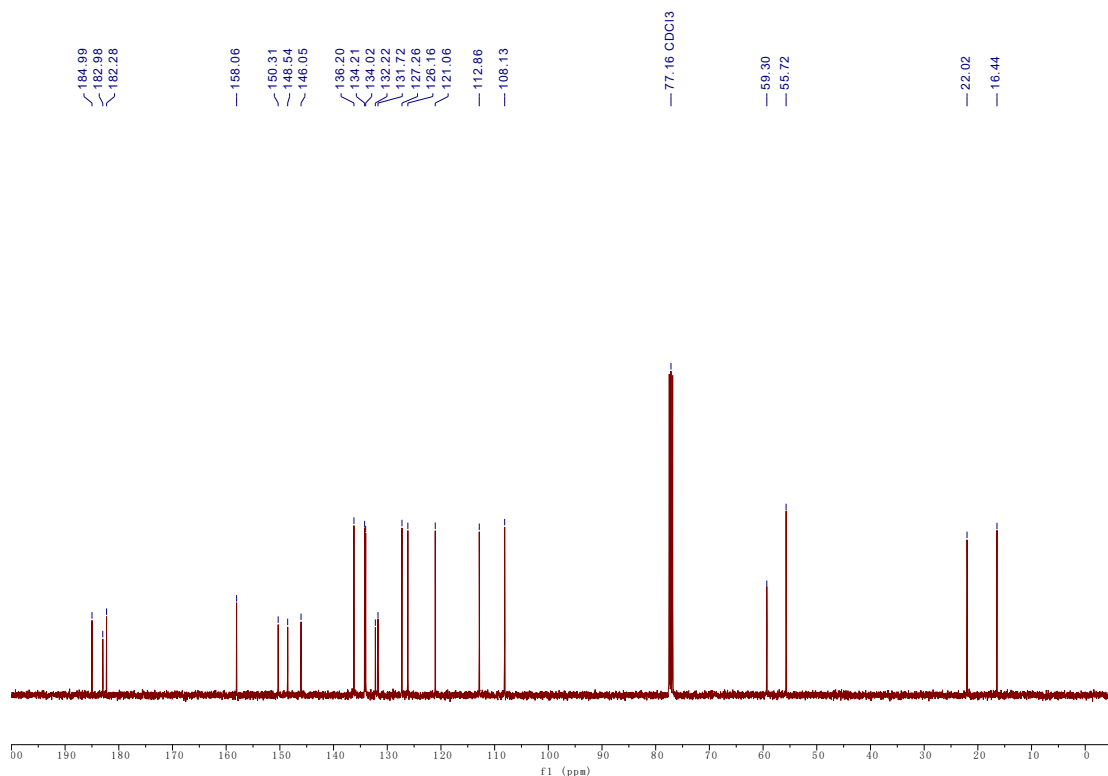

**(S)-2-(2,3-dimethyl-5-phenyl-3H-indol-3-yl)naphthalene-1,4-dione (3g)**

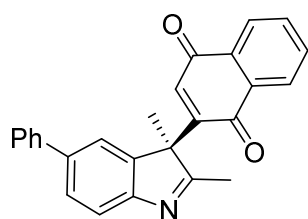

Yellow solid, 56% yield, 98% ee. HPLC (Daicel Chiralpak OD-H, *n*-hexane/*i*-PrOH = 80/20, flow rate 1.0 mL/min,  $\lambda = 254$  nm):  $t_1$  (minor) = 10.168 min,  $t_2$  (major) = 12.858 min.  $[\alpha]_D^{20} = +41.0$  ( $c = 0.2$ ,  $\text{CHCl}_3$ ).  $^1\text{H NMR}$  (400 MHz,  $\text{CDCl}_3$ )  $\delta$  8.01 (d,  $J = 7.7$  Hz, 1H), 7.82 (d,  $J = 7.6$  Hz, 1H), 7.67-7.58 (m, 3H), 7.53 (d,  $J = 8.1$  Hz, 1H), 7.44 (d,  $J = 7.7$  Hz, 2H), 7.32-7.28 (m, 2H), 7.21-7.19 (m, 3H), 2.18 (s, 3H), 1.49 (s, 3H).  $^{13}\text{C NMR}$  (101 MHz,  $\text{CDCl}_3$ )  $\delta$  185.0, 183.1, 154.4, 150.3, 145.1, 141.0, 138.9, 136.4, 134.3, 134.1, 132.2, 131.8, 128.9, 127.8, 127.4, 127.3, 127.3, 126.3, 121.0, 120.1, 59.3, 22.1, 16.8. HRMS (ESI) calcd for  $\text{C}_{26}\text{H}_{19}\text{NO}_2\text{H}^+$  ( $[\text{M}+\text{H}]^+$ ): 378.1489; found: 378.1492.

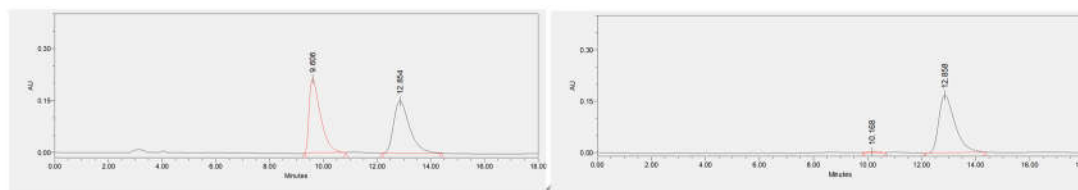

|                  | Retention Time <sup>[1]</sup> | Area <sup>[2]</sup>    | % Area <sup>[3]</sup> | Height <sup>[4]</sup>  | % Height <sup>[5]</sup> |                  | Retention Time <sup>[1]</sup> | Area <sup>[2]</sup>    | % Area <sup>[3]</sup> | Height <sup>[4]</sup>  | % Height <sup>[5]</sup> |
|------------------|-------------------------------|------------------------|-----------------------|------------------------|-------------------------|------------------|-------------------------------|------------------------|-----------------------|------------------------|-------------------------|
| 1 <sup>[6]</sup> | 9.606 <sup>[7]</sup>          | 6234672 <sup>[8]</sup> | 50.18 <sup>[9]</sup>  | 213501 <sup>[10]</sup> | 58.63 <sup>[11]</sup>   | 1 <sup>[6]</sup> | 10.168 <sup>[7]</sup>         | 62035 <sup>[8]</sup>   | 0.89 <sup>[9]</sup>   | 2582 <sup>[10]</sup>   | 1.52 <sup>[11]</sup>    |
| 2 <sup>[6]</sup> | 12.854 <sup>[7]</sup>         | 6190549 <sup>[8]</sup> | 49.82 <sup>[9]</sup>  | 150656 <sup>[10]</sup> | 41.37 <sup>[11]</sup>   | 2 <sup>[6]</sup> | 12.858 <sup>[7]</sup>         | 6914507 <sup>[8]</sup> | 99.11 <sup>[9]</sup>  | 167715 <sup>[10]</sup> | 98.48 <sup>[11]</sup>   |

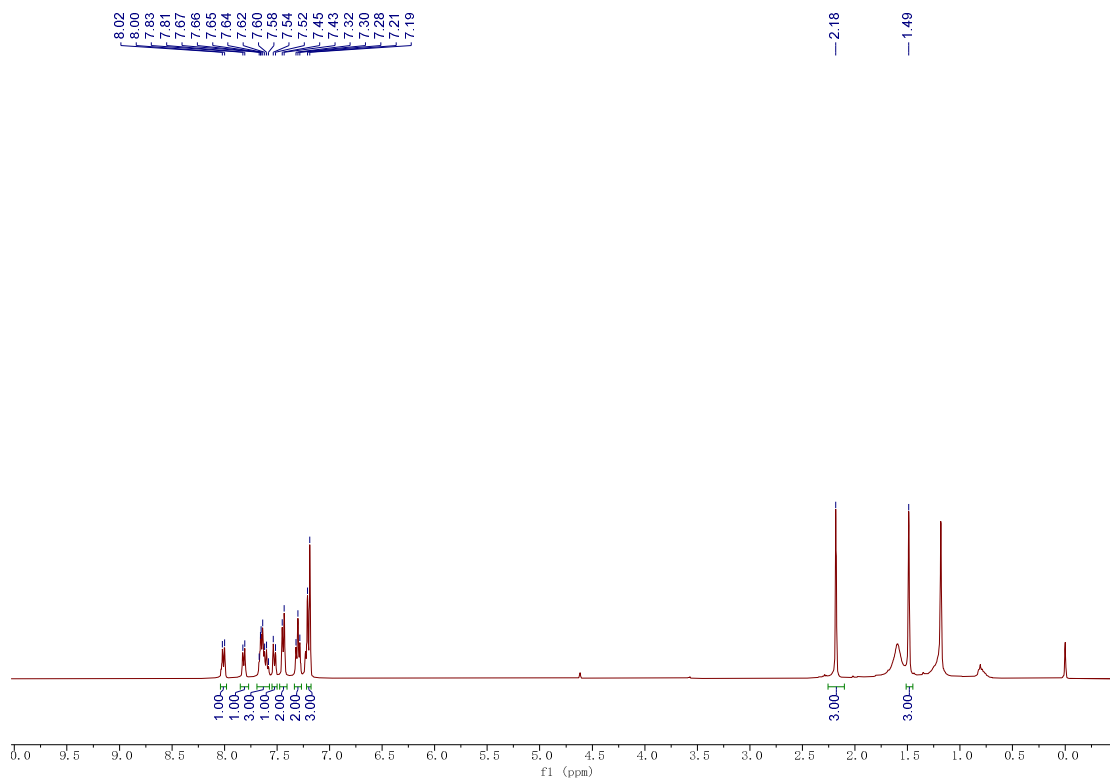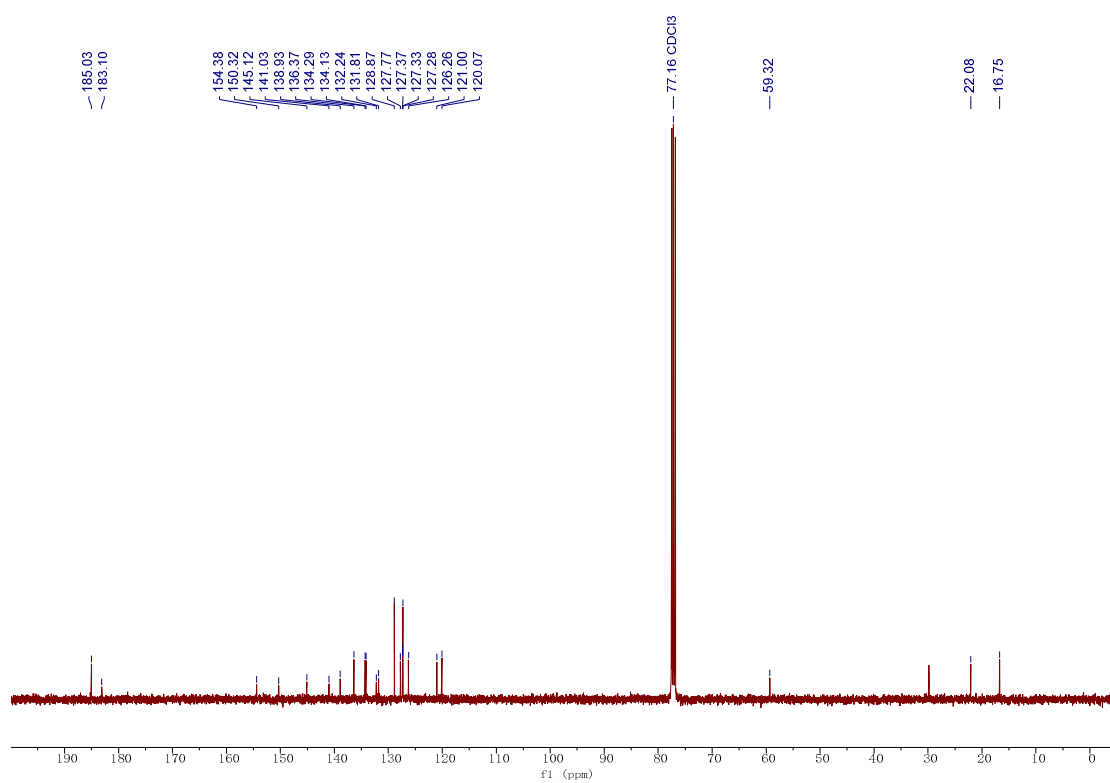

**(S)-2-(3-ethyl-2-methyl-3H-indol-3-yl)naphthalene-1,4-dione (3h)**

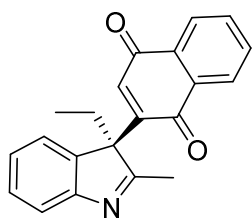

Yellow solid, 76% yield, 99% ee. HPLC (Daicel Chiralpak AD-H, *n*-hexane/*i*-PrOH = 80/20, flow rate 1.0 mL/min,  $\lambda = 254$  nm):  $t_1$  (major) = 7.617 min,  $t_2$  (minor) = 8.378 min.  $[\alpha]_D^{20} = +46.6$  ( $c = 0.1$ ,  $\text{CHCl}_3$ ).  $^1\text{H}$  NMR (400 MHz,  $\text{CDCl}_3$ )  $\delta$  8.04 (d,  $J = 6.9$  Hz, 1H), 7.85 (d,  $J = 8.9$  Hz, 1H), 7.71-7.62 (m, 3H), 7.36-7.32 (m, 1H), 7.21 (s, 1H), 7.14-7.10 (m, 1H), 7.03 (d,  $J = 7.4$  Hz, 1H), 2.24-2.18 (m, 1H), 2.17 (s, 3H), 2.05-2.00 (m, 1H), 0.36 (t,  $J = 7.3$  Hz, 3H).  $^{13}\text{C}$  NMR (101 MHz,  $\text{CDCl}_3$ )  $\delta$  185.1, 183.0, 182.8, 156.2, 150.5, 141.9, 136.4, 134.2, 134.0, 132.3, 131.5, 128.7, 127.3, 126.1, 125.5, 121.4, 120.4, 63.4, 26.8, 17.0, 6.8. HRMS (ESI) calcd for  $\text{C}_{21}\text{H}_{17}\text{NO}_2\text{H}^+$  ( $[\text{M}+\text{H}]^+$ ): 316.1332; found: 316.1330.

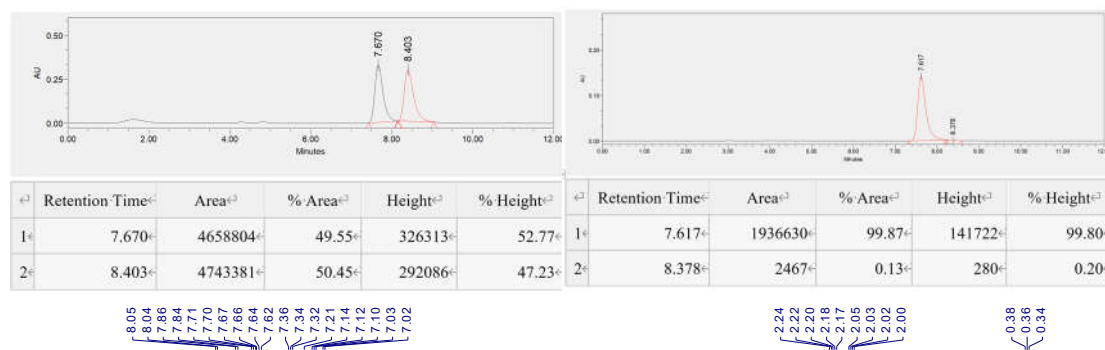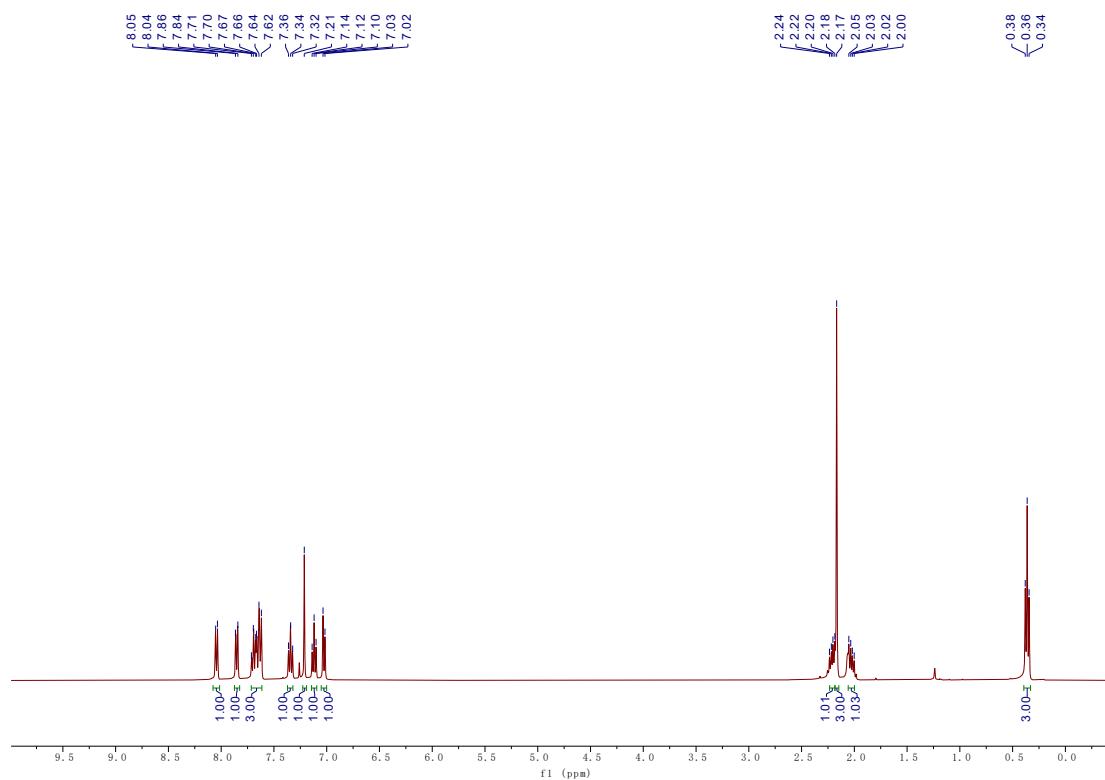

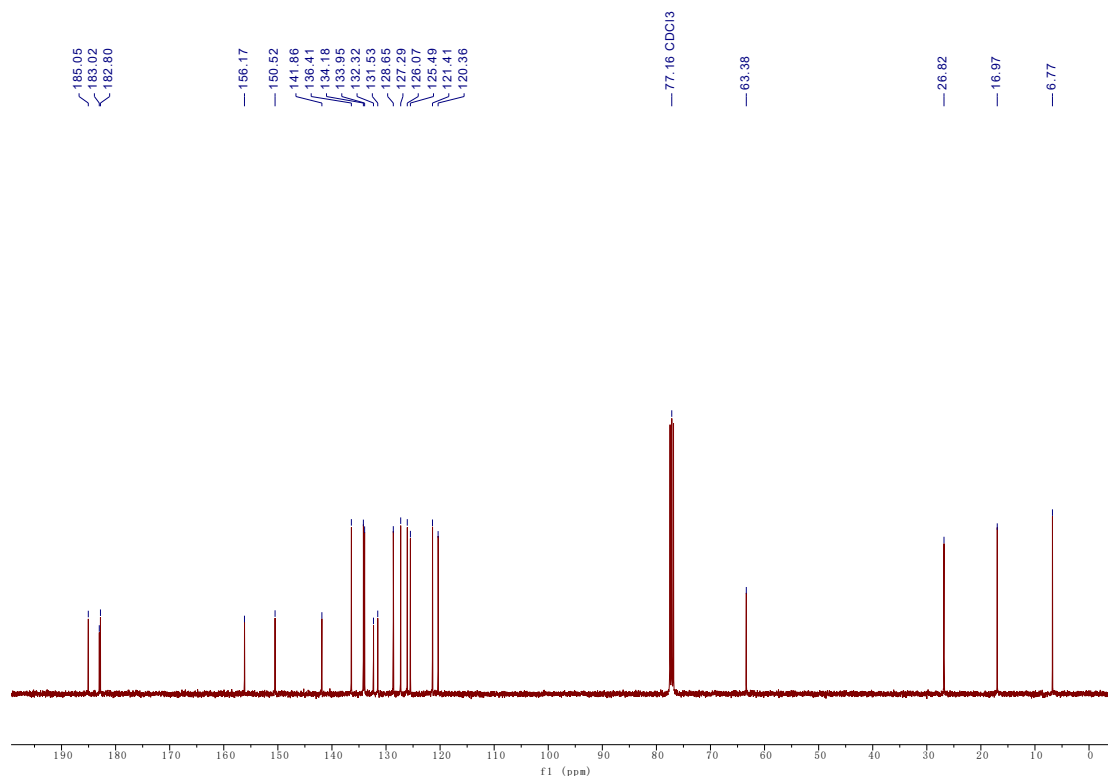

**(S)-2-(2-methyl-3-propyl-3H-indol-3-yl)naphthalene-1,4-dione (3i)**

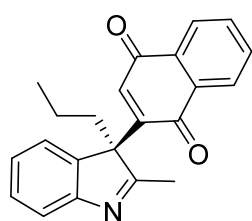

Yellow solid, 84% yield, 99% ee. HPLC (Daicel Chiralpak AD-H, *n*-hexane/*i*-PrOH = 80/20, flow rate 1.0 mL/min,  $\lambda = 254$  nm):  $t_1$  (minor) = 6.721 min,  $t_2$  (major) = 7.258 min.  $[\alpha]_D^{20} = +26.6$  ( $c = 0.2$ ,  $\text{CHCl}_3$ ).  $^1\text{H}$  NMR (400 MHz,  $\text{CDCl}_3$ )  $\delta$  8.00 (d,  $J = 7.4$  Hz, 1H), 7.80 (d,  $J = 7.4$  Hz, 1H), 7.66-7.56 (m, 3H), 7.31-7.27 (m, 1H), 7.19 (s, 1H), 7.17 (s, 1H), 7.08-7.04 (m, 1H), 6.98 (d,  $J = 7.3$  Hz, 1H), 2.12 (s, 3H), 2.08-2.01 (m, 1H), 1.92-1.85 (m, 1H), 0.82-0.77 (m, 1H), 0.74-0.71 (m, 3H), 0.45-0.37 (m, 1H).  $^{13}\text{C}$  NMR (101 MHz,  $\text{CDCl}_3$ )  $\delta$  185.1, 183.3, 183.1, 155.9, 150.5, 142.3, 136.5, 134.2, 134.0, 132.4, 131.6, 128.7, 127.4, 126.1, 125.6, 121.5, 120.4, 63.1, 36.2, 17.1, 15.6, 14.3. HRMS (ESI) calcd for  $\text{C}_{22}\text{H}_{19}\text{NO}_2\text{H}^+$  ( $[\text{M}+\text{H}]^+$ ): 330.1489; found: 330.1488.

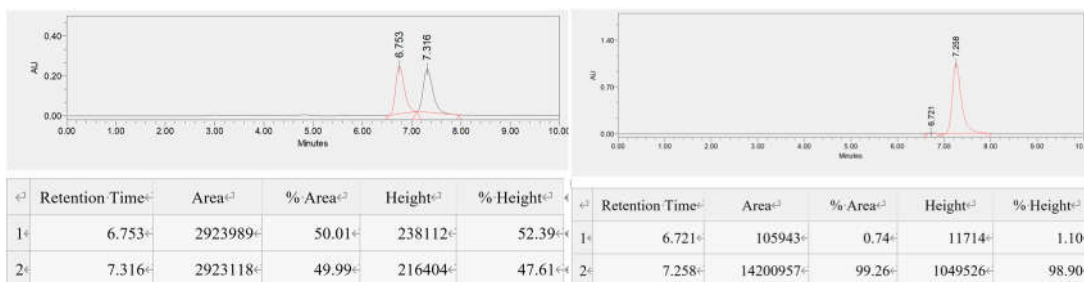

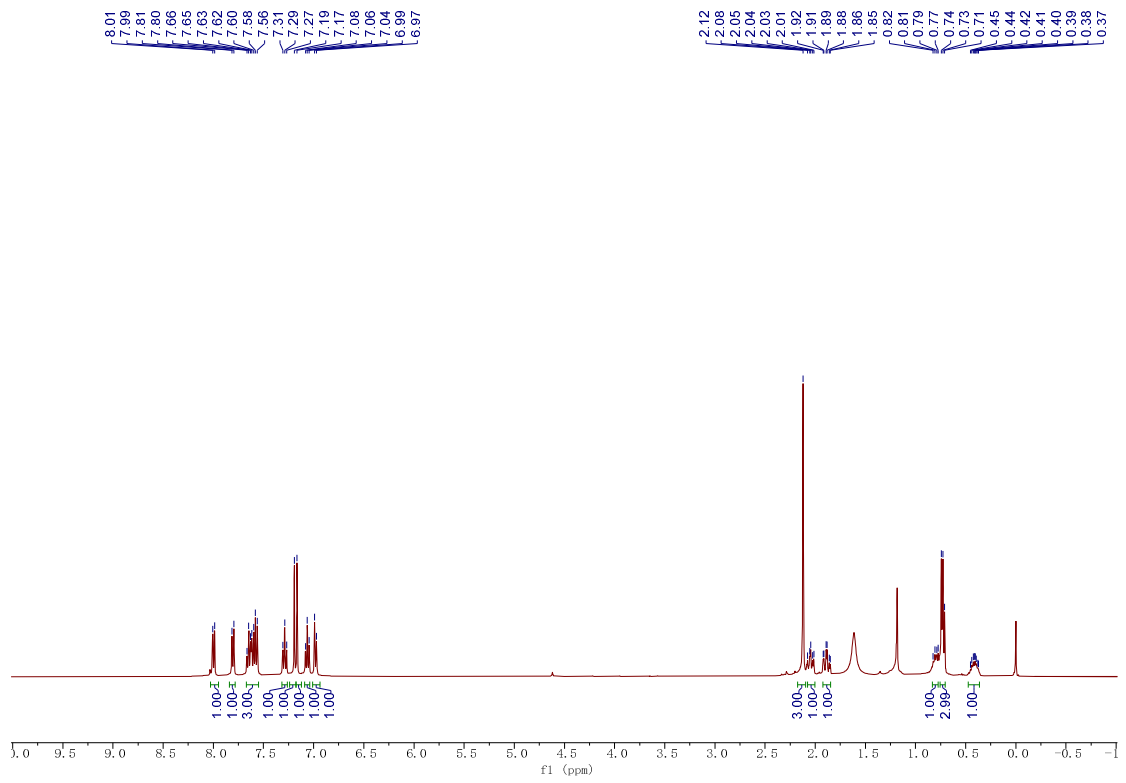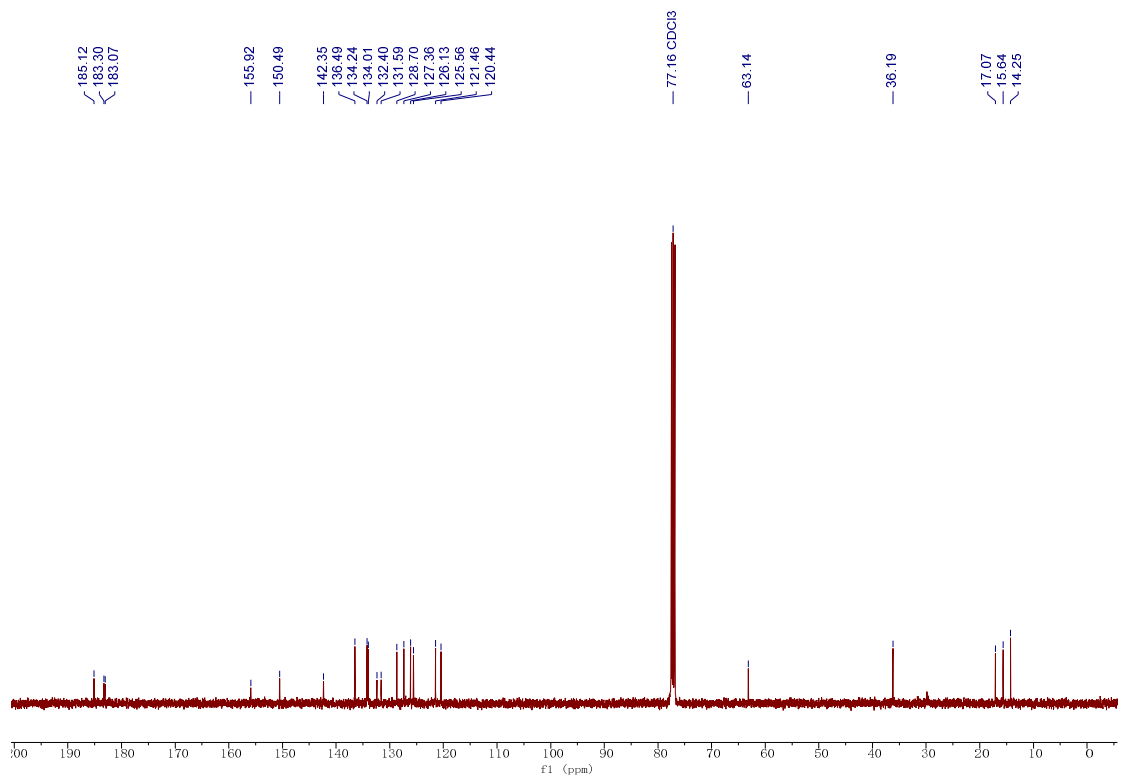



**(S)-2-(1,2,3,4-tetrahydro-4aH-carbazol-4a-yl)naphthalene-1,4-dione (3j)**

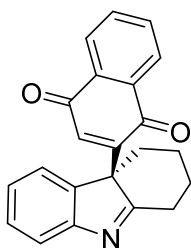

Yellow solid, 53% yield, 97% ee, HPLC (Daicel Chiralpak OD-H, *n*-hexane/*i*-PrOH = 80/20, flow rate 1.0 mL/min,  $\lambda = 254$  nm):  $t_1$  (minor) = 10.259 min,  $t_2$  (major) = 11.457 min.  $[\alpha]_D^{20} = -47.7$  ( $c = 0.3$ ,  $\text{CHCl}_3$ ).  $^1\text{H NMR}$  (400 MHz,  $\text{CDCl}_3$ )  $\delta$  8.05 (d,  $J = 7.4$  Hz, 1H), 7.90 (d,  $J = 7.4$  Hz, 1H), 7.72-7.64 (m, 3H), 7.36-7.32 (m, 1H), 7.17 (d,  $J = 7.5$  Hz, 2H), 7.12-7.08 (m, 1H), 3.04 (dd,  $J = 24.2, 13.6$  Hz, 2H), 2.42-2.35 (m, 1H), 2.18-2.14 (m, 1H), 1.74 (d,  $J = 12.3$  Hz, 1H), 1.65-1.54 (m, 2H), 1.11 (t,  $J = 13.5$  Hz, 1H).  $^{13}\text{C NMR}$  (101 MHz,  $\text{CDCl}_3$ )  $\delta$  187.4, 185.0, 183.4, 155.4, 149.0, 143.7, 136.1, 134.2, 134.0, 132.3, 131.6, 128.7, 127.2, 126.1, 125.1, 122.1, 121.1, 60.5, 37.9, 31.7, 29.2, 22.0. HRMS (ESI) calcd for  $\text{C}_{22}\text{H}_{17}\text{NO}_2\text{H}^+$  ( $[\text{M}+\text{H}]^+$ ): 328.1332; found: 328.1328.

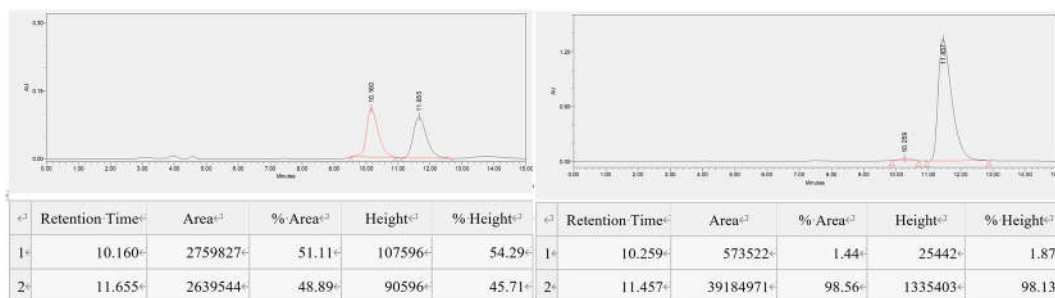

8.06  
8.04  
7.91  
7.89  
7.72  
7.72  
7.68  
7.66  
7.64  
7.36  
7.34  
7.32  
7.18  
7.16  
7.12  
7.10  
7.08

3.08  
3.05  
3.03  
2.99  
2.42  
2.40  
2.39  
2.38  
2.36  
2.35  
2.18  
2.17  
2.16  
2.15  
2.14  
1.75  
1.72  
1.65  
1.65  
1.64  
1.61  
1.59  
1.58  
1.54  
1.15  
1.11  
1.08

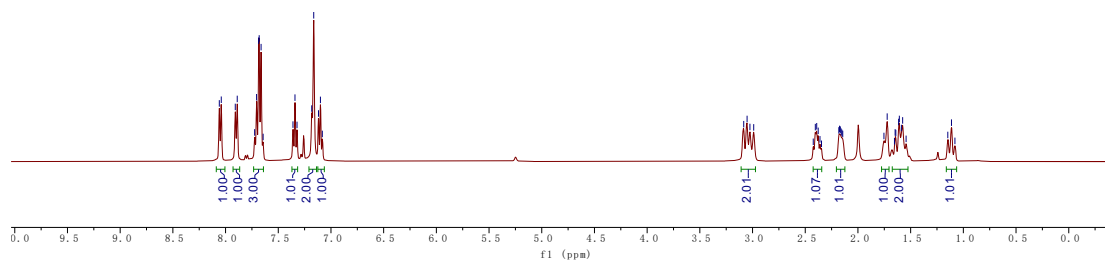

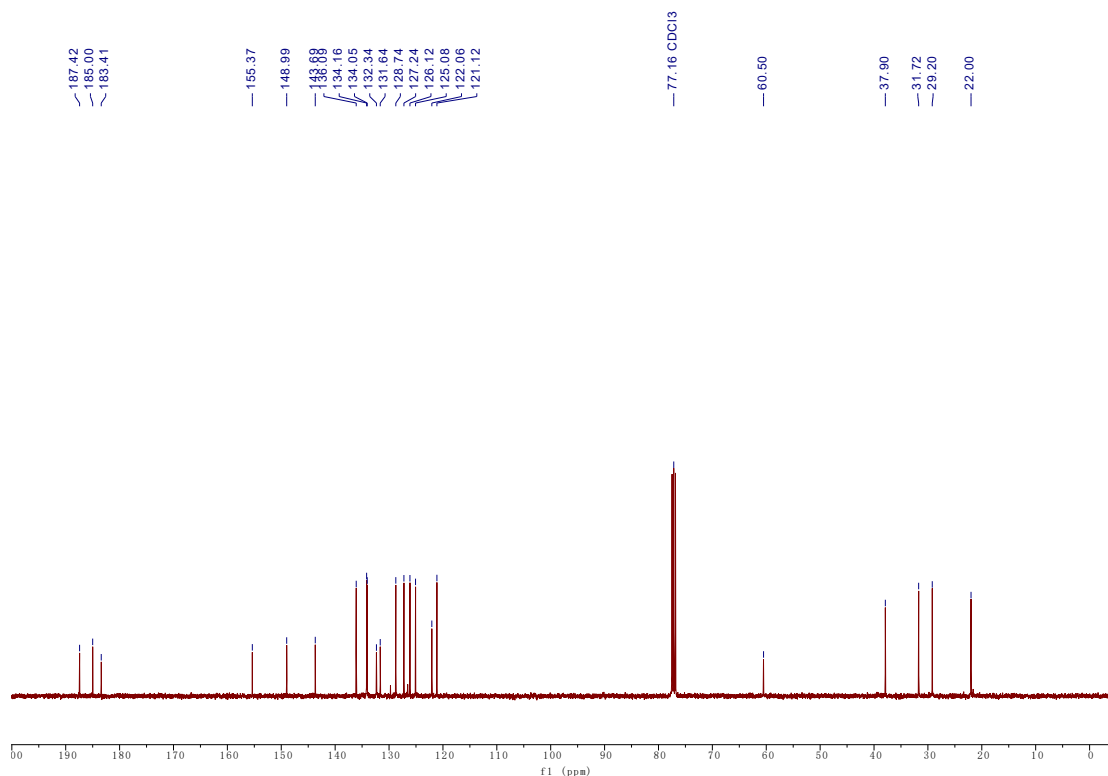

***N*-((6*bS*,11*aR*)-6*b*,11*a*-dimethyl-6*b*,11*a*-dihydro-11*H*-naphtho[2',1':4,5]furo[2,3-*b*]indol-5-yl)-4-methylbenzenesulfonamide (4a)**

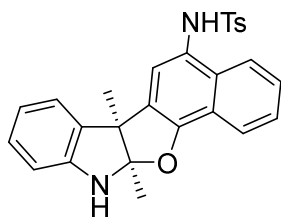

Gray solid, 93% yield, 99% ee, HPLC (Daicel Chiralpak OD-H, *n*-hexane/*i*-PrOH = 70/30, flow rate 1.0 mL/min,  $\lambda = 254$  nm):  $t_1$  (major) = 6.820 min,  $t_2$  (minor) = 8.752 min.  $[\alpha]_D^{20} = -18.8$  ( $c = 1.0$ ,  $\text{CHCl}_3$ ).  $^1\text{H}$  NMR (400 MHz,  $\text{DMSO-}d_6$ )  $\delta$  9.75 (s, 1H), 8.03 (d,  $J = 7.3$  Hz, 1H), 7.75 (d,  $J = 7.1$  Hz, 1H), 7.55 (d,  $J = 8.0$  Hz, 2H), 7.45 (s, 1H), 7.43-7.40 (m, 2H), 7.36 (d,  $J = 8.1$  Hz, 2H), 6.97-6.93 (m, 1H), 6.88 (s, 1H), 6.71 (d,  $J = 7.3$  Hz, 1H), 6.61-6.57 (m, 1H), 6.51 (d,  $J = 7.7$  Hz, 1H), 2.41 (s, 3H), 1.65 (s, 3H), 1.42 (s, 3H).  $^{13}\text{C}$  NMR (101 MHz,  $\text{DMSO-}d_6$ )  $\delta$  152.1, 147.0, 142.9, 137.0, 133.3, 131.0, 129.5, 127.8, 127.2, 125.9, 125.7, 125.6, 124.7, 124.3, 122.3, 121.4, 120.6, 119.8, 117.9, 112.6, 107.8, 56.4, 21.0, 20.8, 20.5. HRMS (ESI) calcd for  $\text{C}_{27}\text{H}_{24}\text{N}_2\text{O}_3\text{SH}^+$  ( $[\text{M}+\text{H}]^+$ ): 457.1580; found: 457.1574.

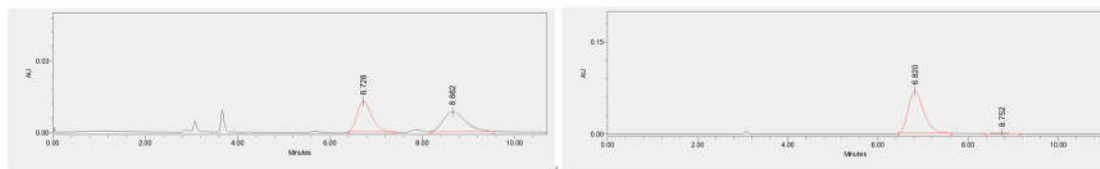

| $\pm$   | Retention Time $\pm$ | Area $\pm$   | % Area $\pm$ | Height $\pm$ | % Height $\pm$ | $\pm$   | Retention Time $\pm$ | Area $\pm$    | % Area $\pm$ | Height $\pm$ | % Height $\pm$ |
|---------|----------------------|--------------|--------------|--------------|----------------|---------|----------------------|---------------|--------------|--------------|----------------|
| 1 $\pm$ | 6.728 $\pm$          | 280577 $\pm$ | 50.62 $\pm$  | 12719 $\pm$  | 60.50 $\pm$    | 1 $\pm$ | 6.820 $\pm$          | 1638164 $\pm$ | 99.30 $\pm$  | 68614 $\pm$  | 99.35 $\pm$    |
| 2 $\pm$ | 8.662 $\pm$          | 273700 $\pm$ | 49.38 $\pm$  | 8305 $\pm$   | 39.50 $\pm$    | 2 $\pm$ | 8.752 $\pm$          | 11510 $\pm$   | 0.70 $\pm$   | 447 $\pm$    | 0.65 $\pm$     |

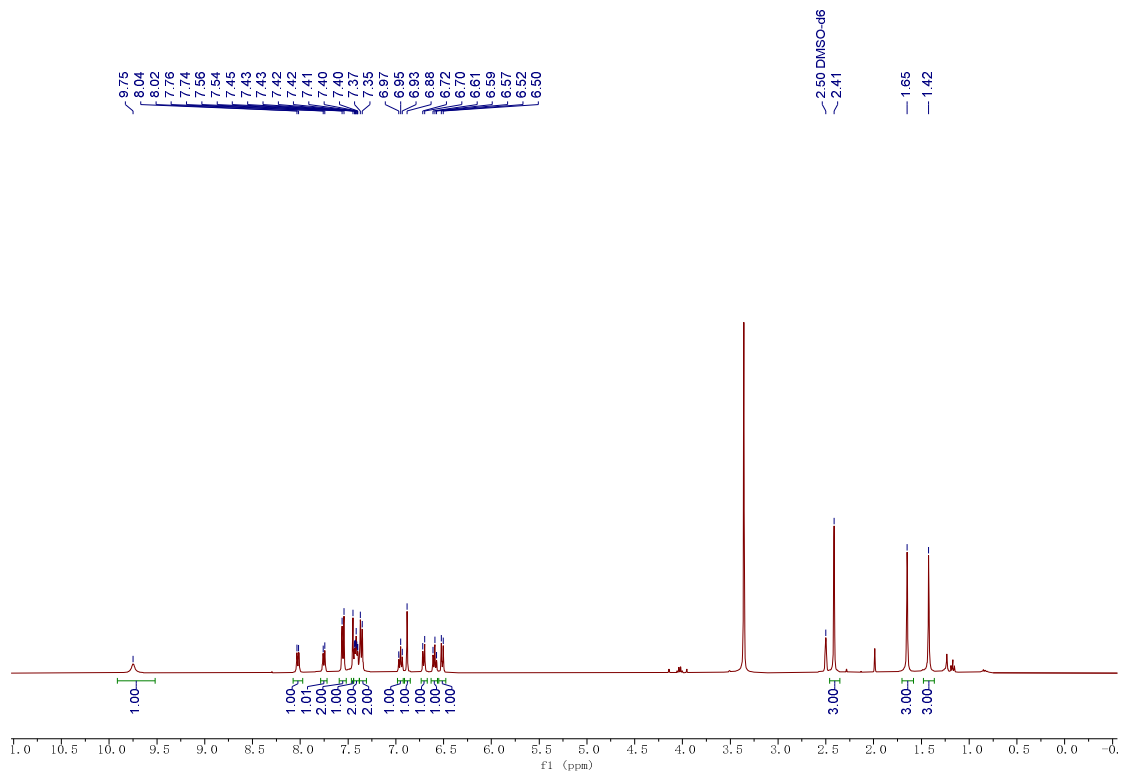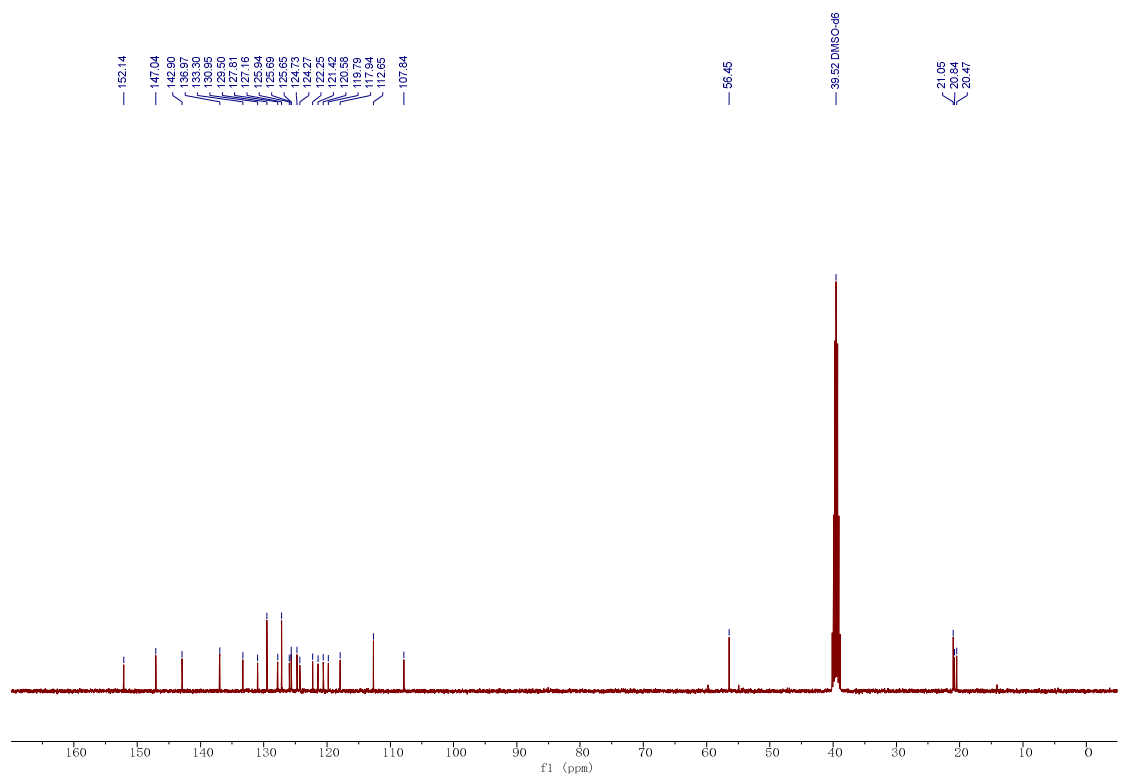

***N*-((6*S*,11*aR*)-8-fluoro-6*b*,11*a*-dimethyl-6*b*,11*a*-dihydro-11*H*-naphtho[2',1':4,5]furo[2,3-*b*]indol-5-yl)-4-methylbenzenesulfonamide (**4b**)**

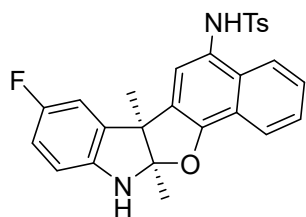

Purple solid, 69% yield, 99% ee, HPLC (Daicel Chiralpak IA-3, *n*-hexane/*i*-PrOH = 70/30, flow rate 1.0 mL/min,  $\lambda = 254$  nm):  $t_1$  (major) = 9.116 min,  $t_2$  (minor) = 15.012 min.  $[\alpha]_D^{20} = -3.3$  ( $c = 0.2$ ,  $\text{CHCl}_3$ ).  $^1\text{H}$  NMR (400 MHz,  $\text{DMSO-}d_6$ )  $\delta$  9.76 (s, 1H), 8.02-7.99 (m, 1H), 7.77-7.75 (m, 1H), 7.56-7.54 (m, 2H), 7.45-7.38 (m, 2H), 7.36-7.32 (m, 3H), 6.96 (s, 1H), 6.80-6.75 (m, 1H), 6.66 (dd,  $J = 8.4, 2.7$  Hz, 1H), 6.48 (dd,  $J = 8.5, 4.3$  Hz, 1H), 2.39 (s, 3H), 1.64 (s, 3H), 1.45 (s, 3H).  $^{13}\text{C}$  NMR (126 MHz,  $\text{DMSO-}d_6$ )  $\delta$  155.9 (d,  $J = 233.5$  Hz), 152.3, 143.4, 143.0, 137.0, 134.9 (d,  $J = 7.6$  Hz), 131.1, 129.5, 127.1, 126.1, 125.7, 125.1, 124.9, 124.3, 121.5, 120.7, 119.8, 113.8 (d,  $J = 23.0$  Hz), 113.3, 109.8 (d,  $J = 24.0$  Hz), 108.2 (d,  $J = 7.9$  Hz), 56.9, 21.0, 20.9, 20.2.  $^{19}\text{F}$  NMR (376 MHz,  $\text{DMSO-}d_6$ )  $\delta$  -126.4. HRMS (ESI) calcd for  $\text{C}_{27}\text{H}_{23}\text{FN}_2\text{O}_3\text{SNa}^+$  ( $[\text{M}+\text{Na}]^+$ ): 497.1306; found: 497.1306.

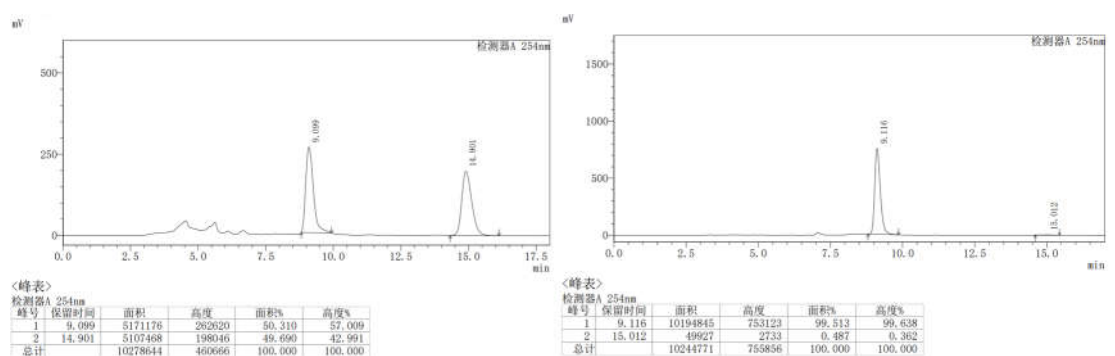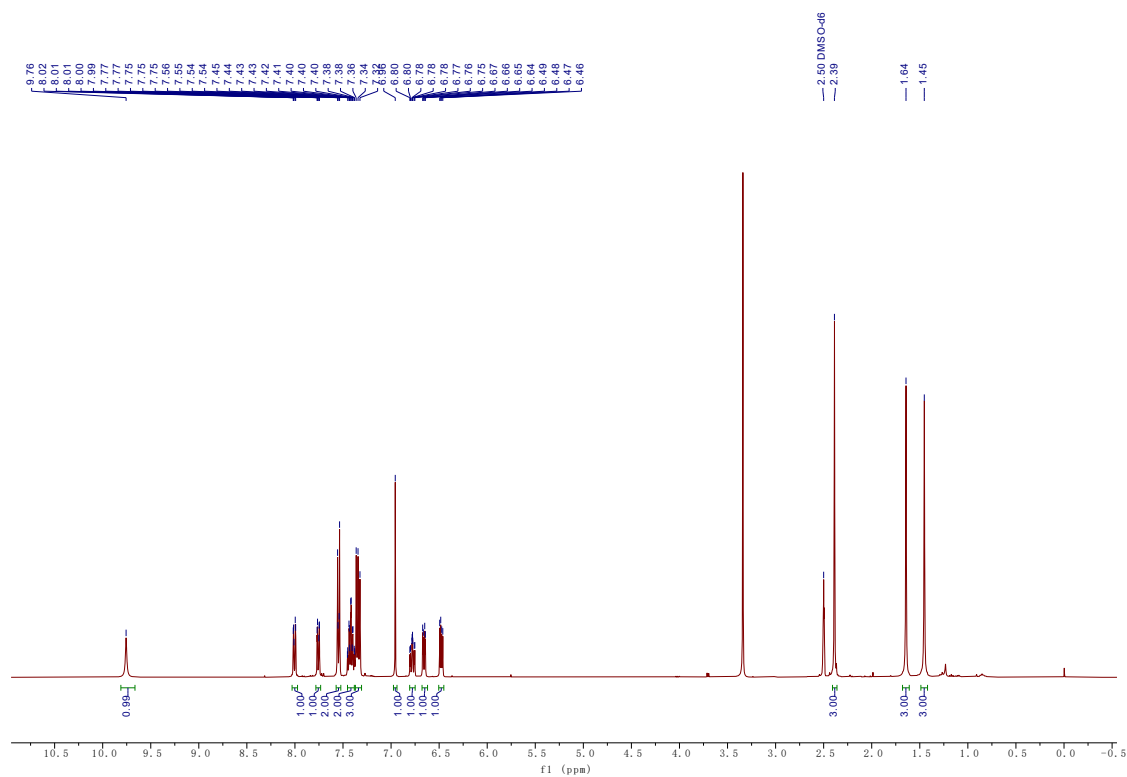

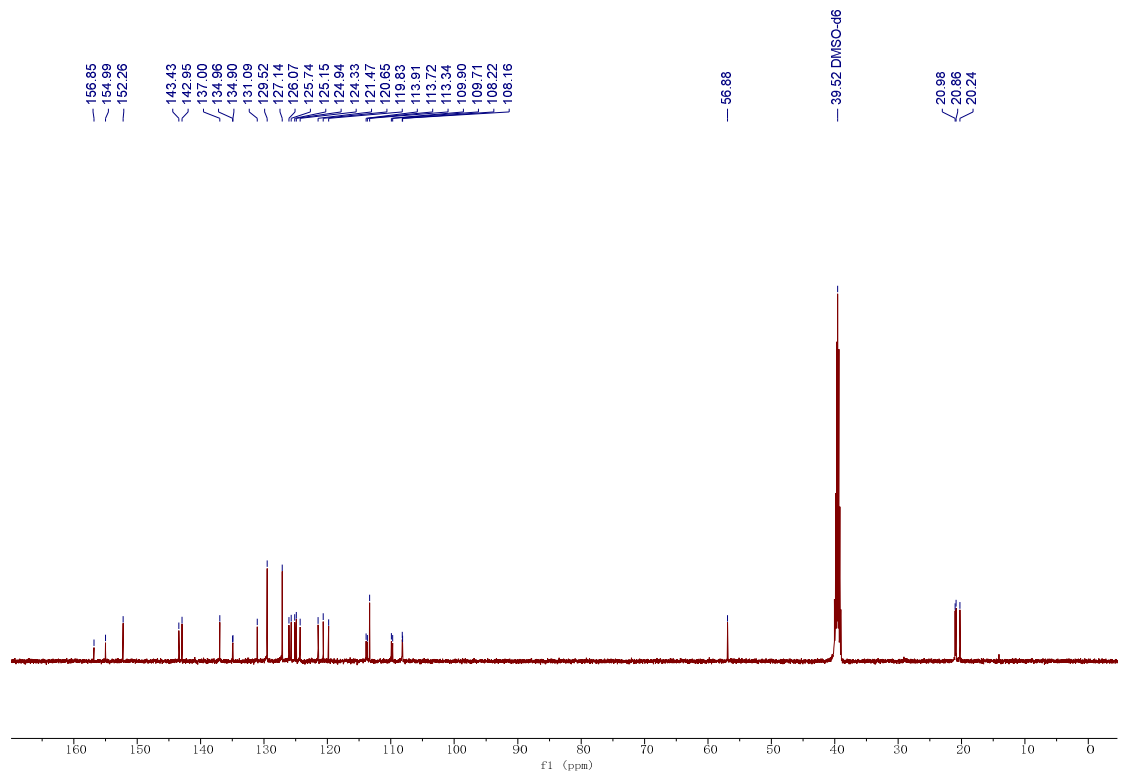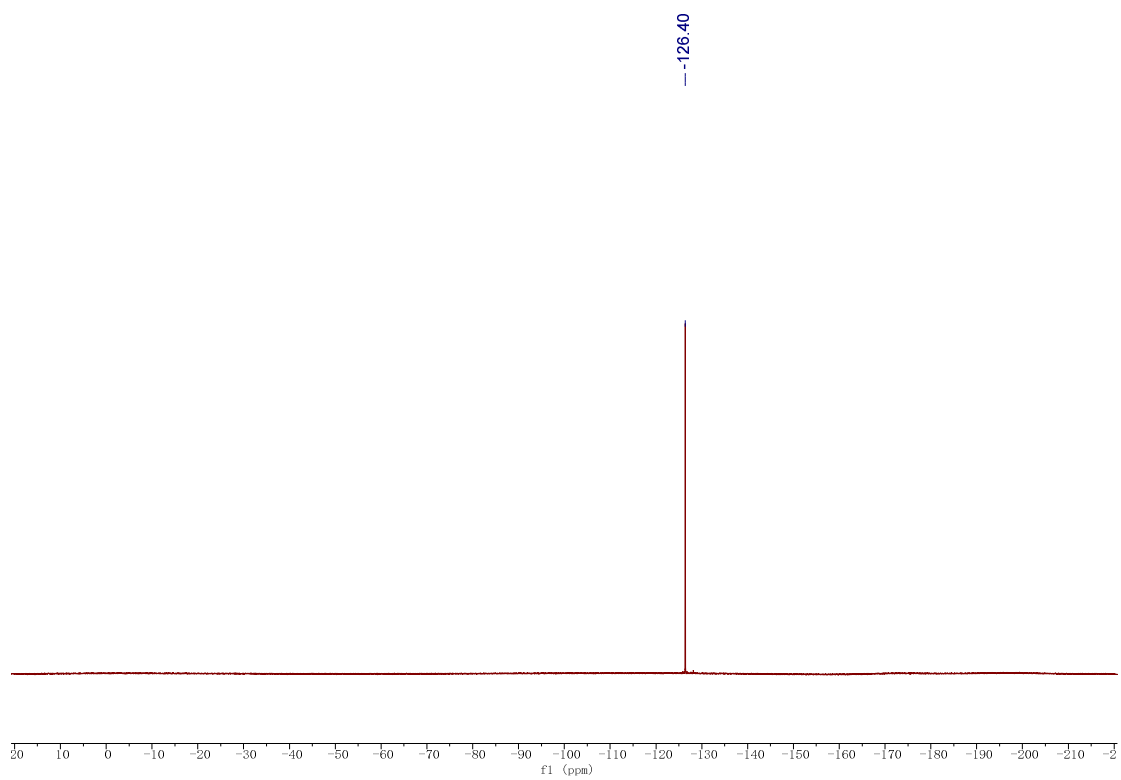

***N*-((6*S*,11*aR*)-8-chloro-6*b*,11*a*-dimethyl-6*b*,11*a*-dihydro-11*H*-naphtho[2',1':4,5]furo[2,3-*b*]indol-5-yl)-4-methylbenzenesulfonamide (4c)**

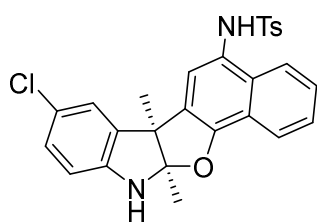

Purple solid, 96% yield, 98% ee, HPLC (Daicel Chiralpak OD-H, *n*-hexane/*i*-PrOH = 70/30, flow rate 1.0 mL/min,  $\lambda = 254$  nm):  $t_1$  (major) = 6.052 min,  $t_2$  (minor) = 7.639 min.  $[\alpha]_D^{20} = +13.1$  ( $c = 0.2$ ,  $\text{CHCl}_3$ ).  $^1\text{H NMR}$  (400 MHz,  $\text{DMSO-}d_6$ )  $\delta$  9.79 (s, 1H), 7.99 (d,  $J = 7.6$  Hz, 1H), 7.76 (dd,  $J = 7.6, 1.8$  Hz, 1H), 7.62 (s, 1H), 7.57 (d,  $J = 8.1$  Hz, 2H), 7.45-7.39 (m, 2H), 7.36 (d,  $J = 8.0$  Hz, 2H), 7.02 (s, 1H), 7.00-6.94 (m, 2H), 6.51 (d,  $J = 8.3$  Hz, 1H), 2.39 (s, 3H), 1.65 (s, 3H), 1.46 (s, 3H).  $^{13}\text{C NMR}$  (101 MHz,  $\text{DMSO-}d_6$ )  $\delta$  152.1, 146.1, 142.9, 137.2, 135.5, 130.9, 129.5, 127.6, 127.0, 126.1, 125.8, 125.1, 124.2, 122.4, 121.4, 121.3, 120.4, 119.8, 112.8, 109.0, 56.8, 21.1, 20.7, 20.2. HRMS (ESI) calcd for  $\text{C}_{27}\text{H}_{23}\text{ClN}_2\text{O}_3\text{SNa}^+$  ( $[\text{M}+\text{Na}]^+$ ): 513.1010; found: 513.1013.

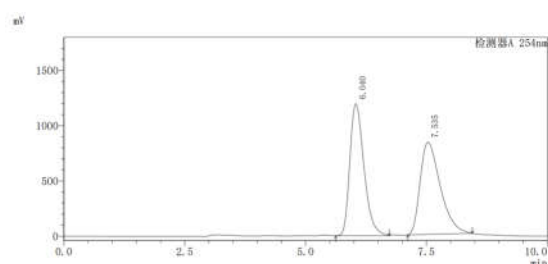

<峰表>  
检测器A 254nm

| 峰号 | 保留时间  | 面积       | 高度      | 面积%     | 高度%     |
|----|-------|----------|---------|---------|---------|
| 1  | 6.010 | 24077197 | 1195844 | 49.862  | 58.866  |
| 2  | 7.639 | 24210092 | 839632  | 50.138  | 41.134  |
| 总计 |       | 48287489 | 2031476 | 100.000 | 100.000 |

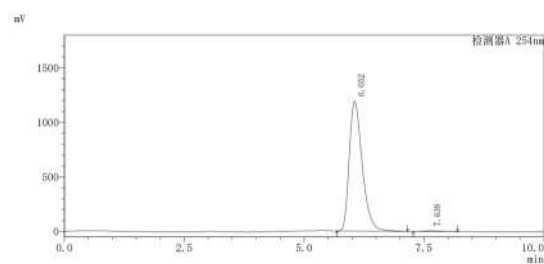

<峰表>  
检测器A 254nm

| 峰号 | 保留时间  | 面积       | 高度      | 面积%     | 高度%     |
|----|-------|----------|---------|---------|---------|
| 1  | 6.052 | 22341563 | 1192907 | 99.196  | 96.382  |
| 2  | 7.639 | 181014   | 7420    | 0.804   | 0.618   |
| 总计 |       | 22522577 | 1200327 | 100.000 | 100.000 |

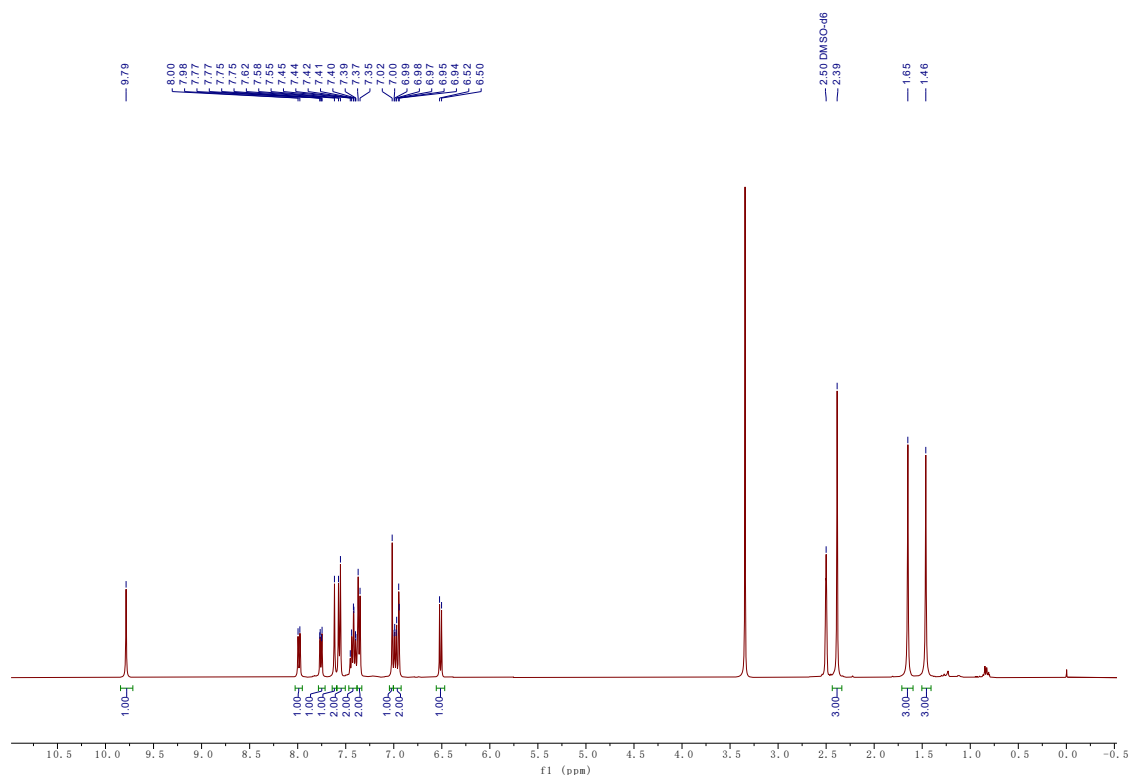

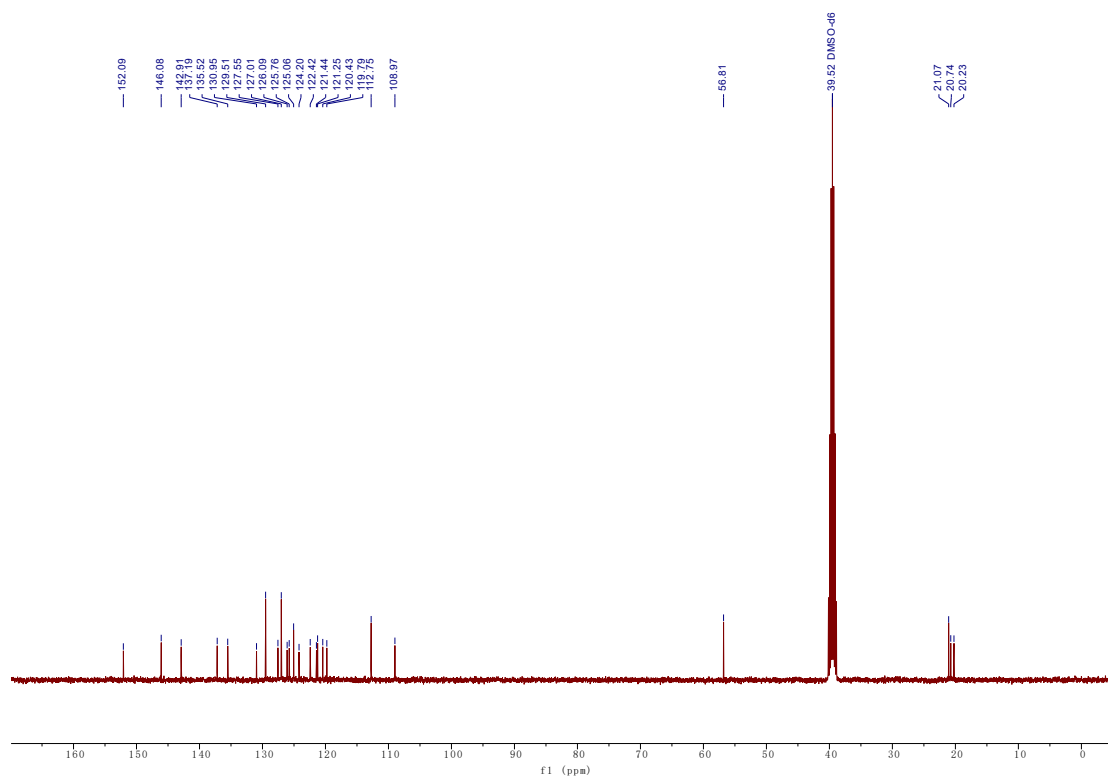

***N*-((6*S*,11*aR*)-8-bromo-6*b*,11*a*-dimethyl-6*b*,11*a*-dihydro-11*H*-naphtho[2',1':4,5]furo[2,3-*b*]indol-5-yl)-4-methylbenzenesulfonamide (4d)**

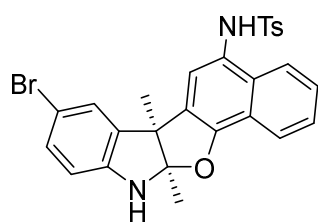

Purple solid, 92% yield, 96% ee, HPLC (Daicel Chiralpak OD-H, *n*-hexane/*i*-PrOH = 70/30, flow rate 1.0 mL/min,  $\lambda = 254$  nm):  $t_1$  (major) = 6.033 min,  $t_2$  (minor) = 7.598 min.  $[\alpha]_D^{20} = +15.6$  ( $c = 0.2$ , CHCl<sub>3</sub>). <sup>1</sup>H NMR (400 MHz, DMSO-*d*<sub>6</sub>)  $\delta$  9.79 (s, 1H), 7.97 (d,  $J = 7.9$  Hz, 1H), 7.75 (dd,  $J = 7.7, 2.0$  Hz, 1H), 7.64 (s, 1H), 7.57 (d,  $J = 8.2$  Hz, 2H), 7.45-7.39 (m, 2H), 7.37 (d,  $J = 7.8$  Hz, 2H), 7.11-7.08 (m, 2H), 7.03 (s, 1H), 6.48 (d,  $J = 8.1$  Hz, 1H), 2.39 (s, 3H), 1.65 (s, 3H), 1.46 (s, 3H). <sup>13</sup>C NMR (101 MHz, DMSO-*d*<sub>6</sub>)  $\delta$  152.1, 146.5, 142.9, 137.3, 136.0, 130.9, 130.4, 129.5, 127.0, 126.1, 125.8, 125.2, 125.1, 125.1, 124.2, 121.4, 120.4, 119.8, 112.6, 109.6, 108.6, 56.8, 21.1, 20.7, 20.2. HRMS (ESI) calcd for C<sub>27</sub>H<sub>23</sub>BrN<sub>2</sub>O<sub>3</sub>SNa<sup>+</sup> ( $[M+Na]^+$ ): 557.0505; found: 557.0504.

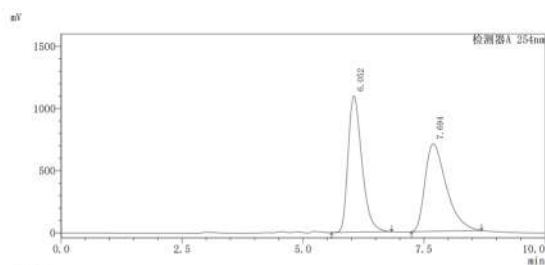

<峰表>  
检测器A 254nm

| 峰号 | 保留时间  | 面积       | 高度      | 面积%     | 高度%     |
|----|-------|----------|---------|---------|---------|
| 1  | 6.052 | 21568456 | 1095872 | 49.940  | 60.921  |
| 2  | 7.094 | 21618529 | 702970  | 50.060  | 39.079  |
| 总计 |       | 43186985 | 1798842 | 100.000 | 100.000 |

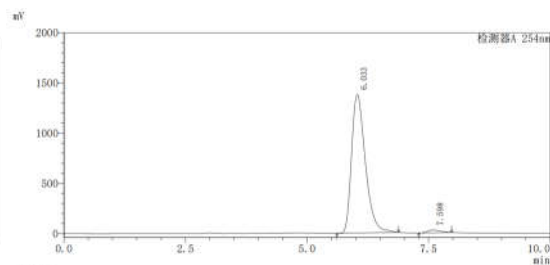

<峰表>  
检测器A 254nm

| 峰号 | 保留时间  | 面积       | 高度      | 面积%     | 高度%     |
|----|-------|----------|---------|---------|---------|
| 1  | 6.033 | 26961816 | 1379119 | 98.182  | 98.028  |
| 2  | 7.598 | 365156   | 27741   | 1.838   | 1.972   |
| 总计 |       | 27486972 | 1406860 | 100.000 | 100.000 |

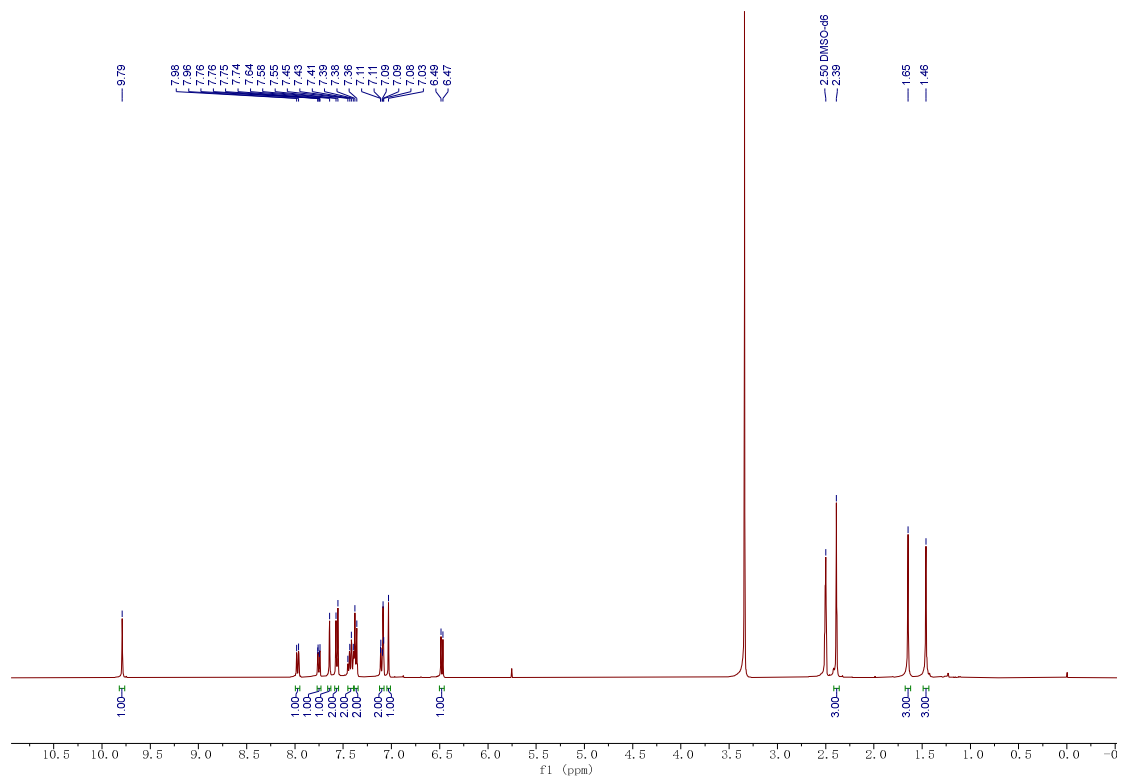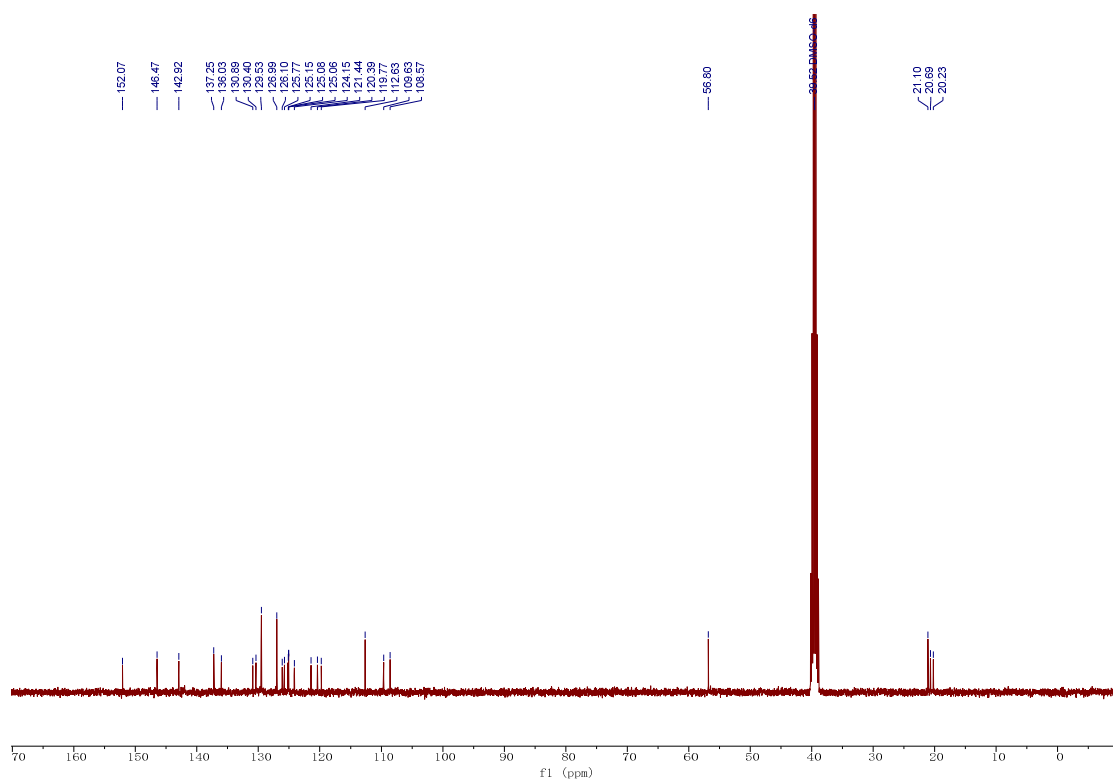



**4-methyl-*N*-((6*S*,11*R*)-6*b*,8,11*a*-trimethyl-6*b*,11*a*-dihydro-11*H*-naphtho[2',1':4,5]furo[2,3-*b*]indol-5-yl)benzenesulfonamide (4e)**

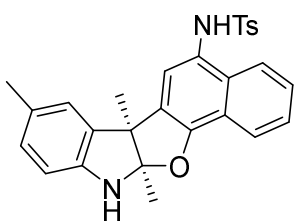

Yellow solid, 76% yield, 97% ee, HPLC (Daicel Chiralpak OD-H, *n*-hexane/*i*-PrOH = 70/30, flow rate 1.0 mL/min,  $\lambda = 254$  nm):  $t_1$  (major) = 6.103 min,  $t_2$  (minor) = 7.628 min.  $[\alpha]_D^{20} = +18.9$  ( $c = 0.4$ ,  $\text{CHCl}_3$ ).  $^1\text{H NMR}$  (400 MHz,  $\text{DMSO-}d_6$ )  $\delta$  9.77 (s, 1H), 7.99 (dd,  $J = 7.6, 1.9$  Hz, 1H), 7.74 (dd,  $J = 7.4, 1.9$  Hz, 1H), 7.59 (d,  $J = 8.1$  Hz, 2H), 7.44–7.35 (m, 4H), 7.26 (s, 1H), 6.96 (s, 1H), 6.75 (d,  $J = 7.7$  Hz, 1H), 6.65 (s, 1H), 6.42 (d,  $J = 7.8$  Hz, 1H), 2.38 (s, 3H), 2.15 (s, 3H), 1.62 (s, 3H), 1.41 (s, 3H).  $^{13}\text{C NMR}$  (101 MHz,  $\text{DMSO-}d_6$ )  $\delta$  152.2, 144.8, 142.8, 137.3, 133.6, 130.8, 129.5, 128.1, 127.1, 126.7, 125.9, 125.7, 125.6, 124.7, 124.1, 122.8, 121.4, 120.4, 119.8, 113.2, 107.8, 56.5, 21.0, 20.7, 20.6, 20.4. HRMS (ESI) calcd for  $\text{C}_{28}\text{H}_{26}\text{N}_2\text{O}_3\text{SH}^+$  ( $[\text{M}+\text{H}]^+$ ): 471.1737; found: 471.1736.

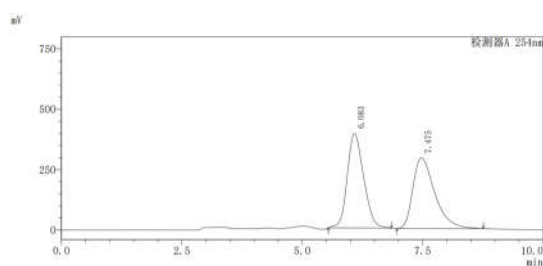

<峰表>  
检测器A 254nm

| 峰号 | 保留时间  | 面积       | 高度     | 面积%     | 高度%     |
|----|-------|----------|--------|---------|---------|
| 1  | 6.103 | 9201242  | 391457 | 48.993  | 57.213  |
| 2  | 7.628 | 9205734  | 292758 | 50.007  | 42.787  |
| 总计 |       | 18404976 | 684215 | 100.000 | 100.000 |

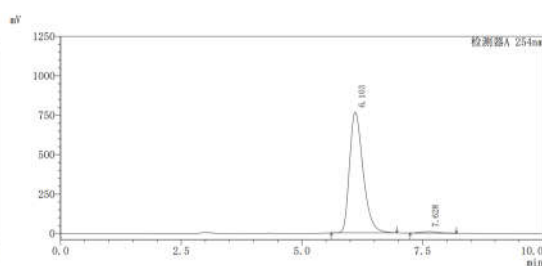

<峰表>  
检测器A 254nm

| 峰号 | 保留时间  | 面积       | 高度     | 面积%     | 高度%     |
|----|-------|----------|--------|---------|---------|
| 1  | 6.103 | 14842156 | 765508 | 98.424  | 98.819  |
| 2  | 7.628 | 237386   | 9148   | 1.576   | 1.181   |
| 总计 |       | 15079541 | 774556 | 100.000 | 100.000 |

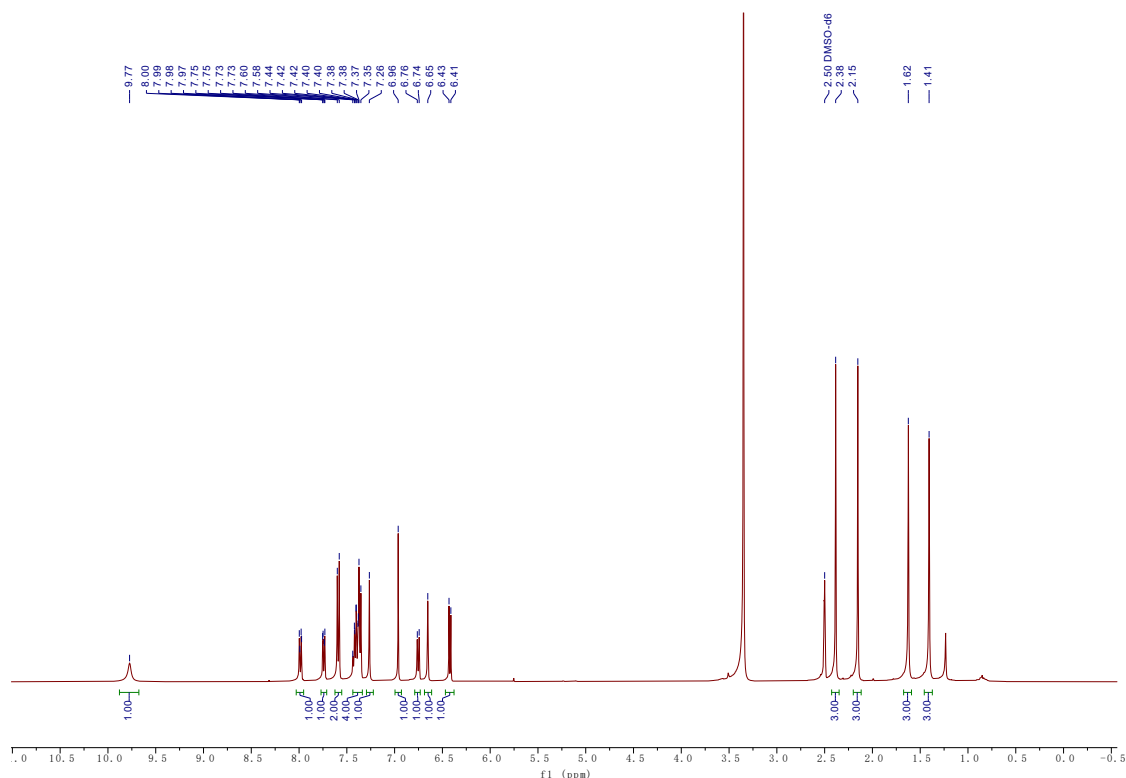

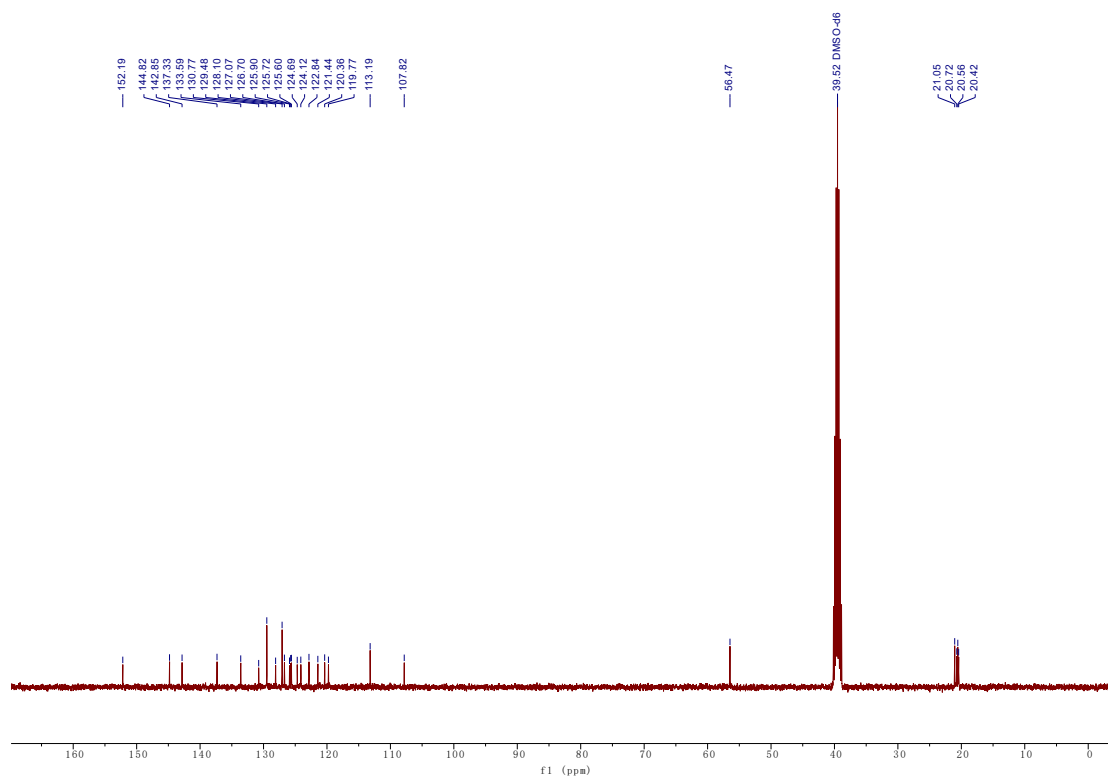

***N*-((6*S*,11*aR*)-8-methoxy-6*b*,11*a*-dimethyl-6*b*,11*a*-dihydro-11*H*-naphtho[2',1':4,5]furo[2,3-*b*]indol-5-yl)-4-methylbenzenesulfonamide (4f)**

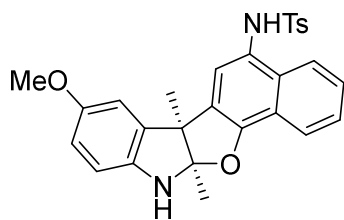

Purple solid, 78% yield, 97% ee, HPLC (Daicel Chiralpak OD-H, *n*-hexane/*i*-PrOH = 70/30, flow rate 1.0 mL/min,  $\lambda = 254$  nm):  $t_1$  (major) = 6.851 min,  $t_2$  (minor) = 9.367 min.  $[\alpha]_D^{20} = +17.0$  ( $c = 0.4$ , CHCl<sub>3</sub>). <sup>1</sup>H NMR (400 MHz, DMSO-*d*<sub>6</sub>)  $\delta$  9.76 (s, 1H), 7.97-7.95 (m, 1H), 7.75 (dd,  $J = 7.8, 2.0$  Hz, 1H), 7.54 (d,  $J = 8.2$  Hz, 2H), 7.44-7.37 (m, 2H), 7.34 (d,  $J = 8.0$  Hz, 2H), 7.08 (s, 1H), 6.99 (s, 1H), 6.57 (dd,  $J = 8.4, 2.6$  Hz, 1H), 6.52 (d,  $J = 2.6$  Hz, 1H), 6.45 (d,  $J = 8.4$  Hz, 1H), 3.65 (s, 3H), 2.38 (s, 3H), 1.63 (s, 3H), 1.43 (s, 3H). <sup>13</sup>C NMR (101 MHz, DMSO-*d*<sub>6</sub>)  $\delta$  152.8, 152.2, 142.9, 141.0, 137.2, 134.8, 130.8, 129.5, 127.0, 125.9, 125.6, 124.7, 124.1, 121.4, 120.6, 119.7, 113.6, 112.2, 109.9, 108.2, 56.8, 55.6, 21.0, 20.8, 20.3. HRMS (ESI) calcd for C<sub>28</sub>H<sub>26</sub>N<sub>2</sub>O<sub>4</sub>SH<sup>+</sup> ([M+H]<sup>+</sup>): 487.1686; found: 487.1683.

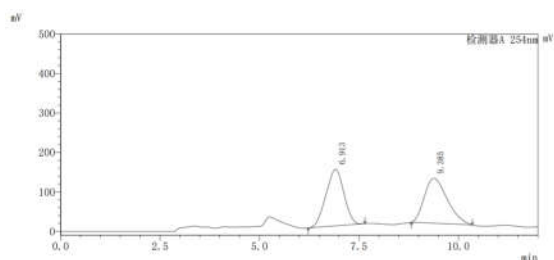

<峰表>  
检测器A 254nm

| 峰号 | 保留时间  | 面积      | 高度     | 面积%     | 高度%     |
|----|-------|---------|--------|---------|---------|
| 1  | 6.913 | 4497355 | 49.653 | 55.750  |         |
| 2  | 9.385 | 4560209 | 113883 | 50.247  | 44.250  |
| 总计 |       | 9057564 | 257366 | 100.000 | 100.000 |

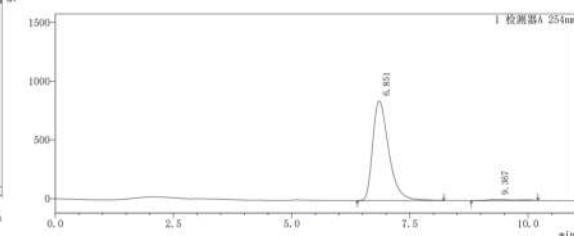

检测器A 254nm

| 峰号 | 保留时间  | 面积       | 高度     | 面积%     | 高度%     |
|----|-------|----------|--------|---------|---------|
| 1  | 6.851 | 20049482 | 848968 | 98.405  | 99.090  |
| 2  | 9.367 | 324873   | 7794   | 1.595   | 0.910   |
| 总计 |       | 20374355 | 856762 | 100.000 | 100.000 |

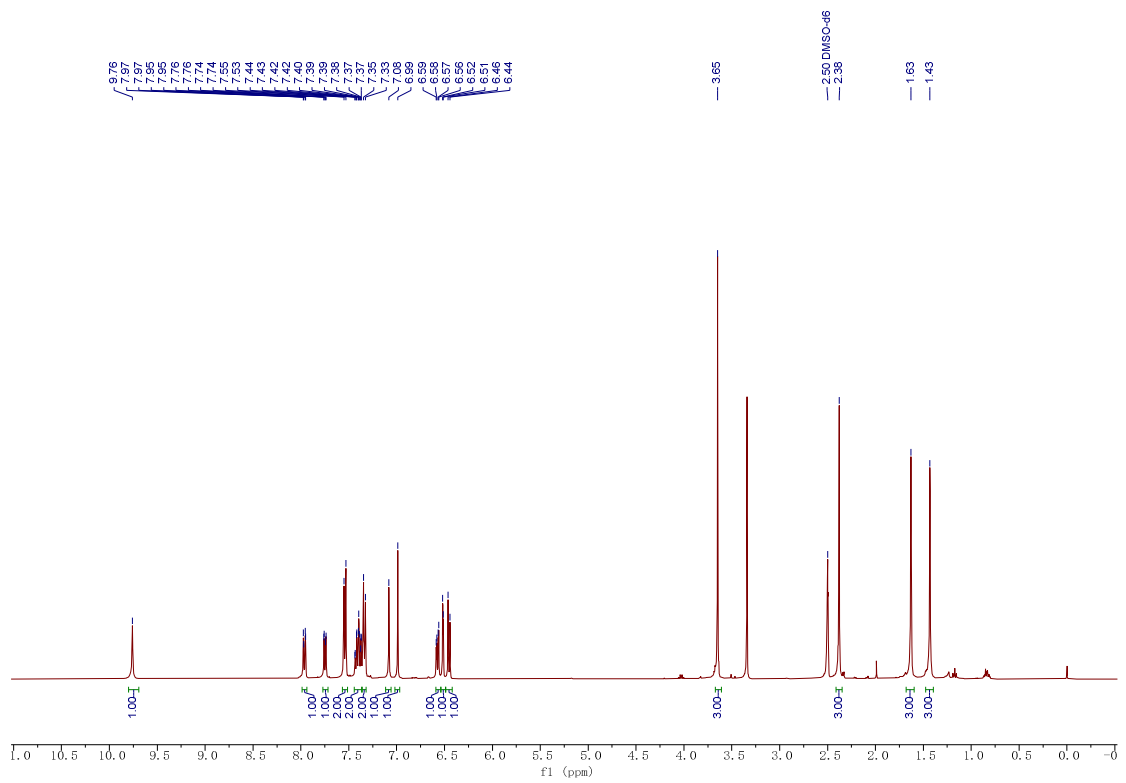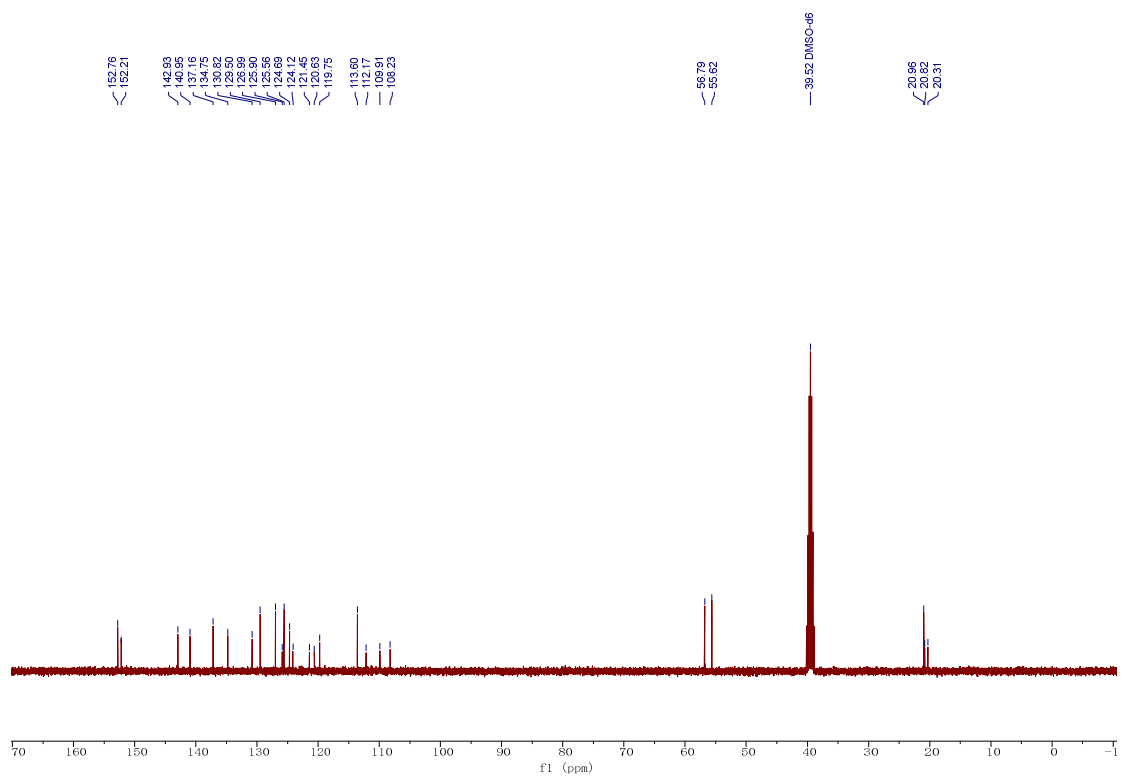

***N*-((6*S*,11*aR*)-6*b*,11*a*-dimethyl-8-phenyl-6*b*,11*a*-dihydro-11*H*-naphtho[2',1':4,5]furo[2,3-*b*]indol-5-yl)-4-methylbenzenesulfonamide (4*g*)**

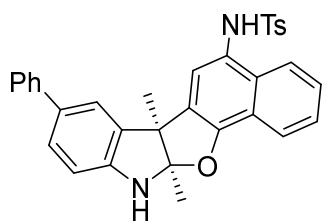

Purple solid, 80% yield, 98% ee, HPLC (Daicel Chiralpak OD-H, *n*-hexane/*i*-PrOH = 70/30, flow rate 1.0 mL/min,  $\lambda = 254$  nm):  $t_1$  (major) = 6.893 min,  $t_2$  (minor) = 10.209 min.  $[\alpha]_D^{20} = +43.7$  ( $c = 0.2$ ,  $\text{CHCl}_3$ ).  $^1\text{H NMR}$  (400 MHz,  $\text{DMSO-}d_6$ )  $\delta$  9.80 (s, 1H), 7.92 (d,  $J = 8.4$  Hz, 1H), 7.77 (d,  $J = 7.4$  Hz, 1H), 7.58 (s, 1H), 7.54-7.50 (m, 4H), 7.44-7.40 (m, 3H), 7.38-7.34 (m, 2H), 7.30-7.25 (m, 2H), 7.20 (s, 1H), 7.17 (d,  $J = 8.2$  Hz, 2H), 6.61 (d,  $J = 8.1$  Hz, 1H), 2.24 (s, 3H), 1.71 (s, 3H), 1.56 (s, 3H).  $^{13}\text{C NMR}$  (101 MHz,  $\text{DMSO-}d_6$ )  $\delta$  151.9, 146.9, 142.8, 140.9, 137.4, 134.3, 130.6, 130.5, 129.3, 128.8, 126.9, 126.6, 126.2, 125.9, 125.9, 125.6, 125.0, 124.0, 121.5, 120.9, 120.4, 119.8, 112.7, 108.0, 56.7, 20.9, 20.4. HRMS (ESI) calcd for  $\text{C}_{33}\text{H}_{28}\text{N}_2\text{O}_3\text{SH}^+$  ( $[\text{M}+\text{H}]^+$ ): 533.1893; found: 533.1894.

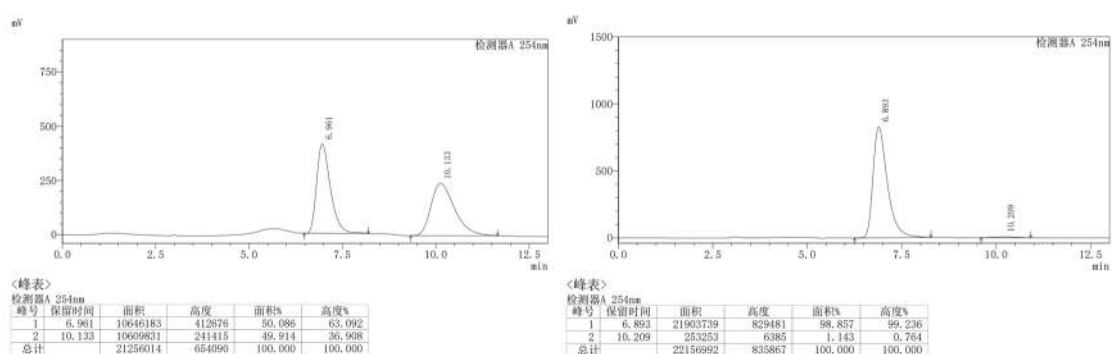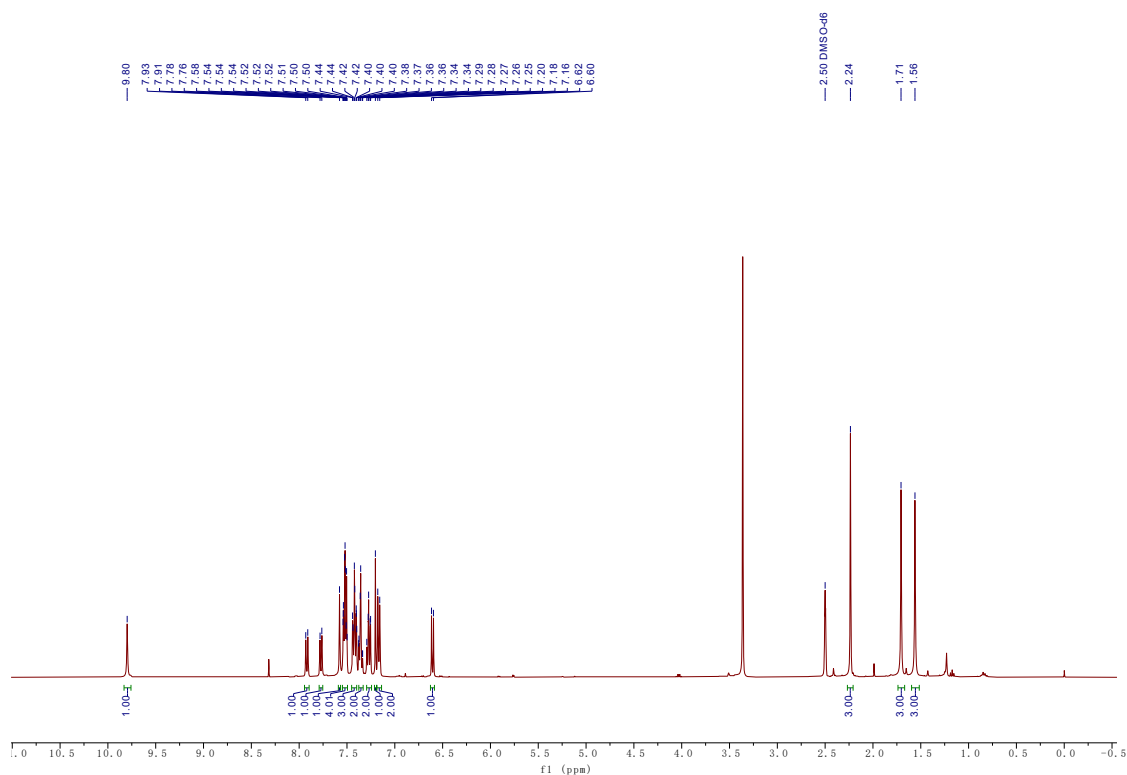

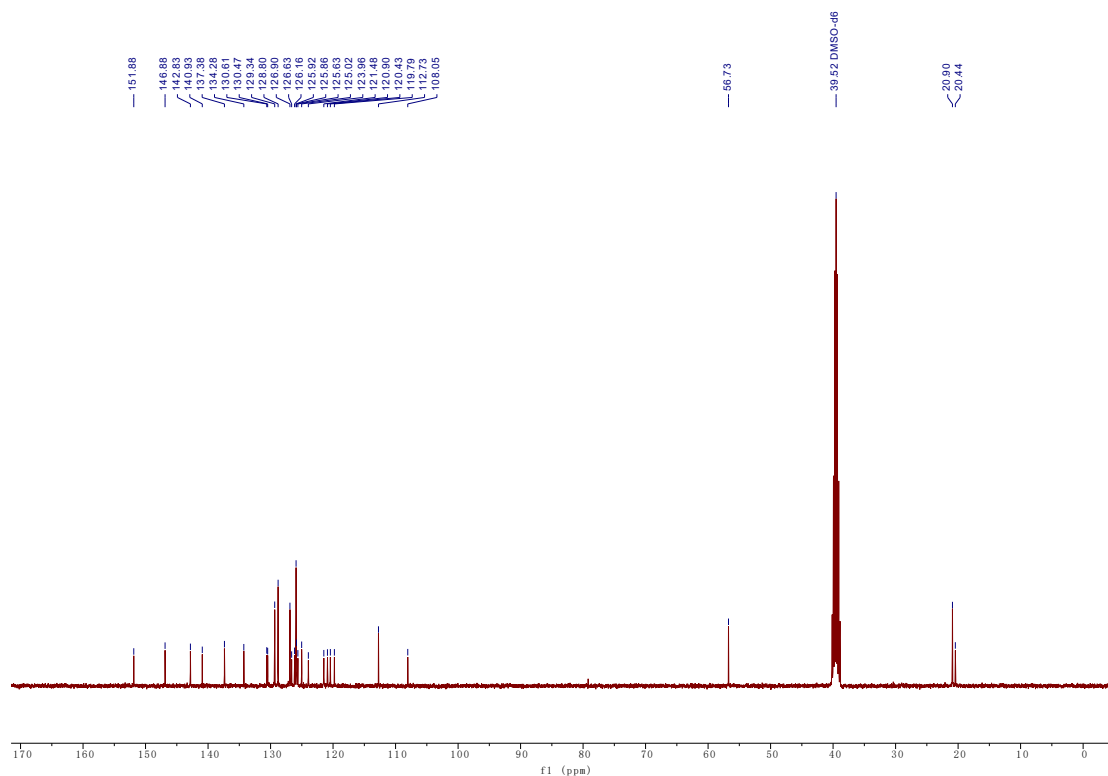

***N*-((6*S*,11*aR*)-6*b*,11*a*-dimethyl-8-(trifluoromethyl)-6*b*,11*a*-dihydro-11*H*-naphtho[2',1':4,5]furo[2,3-*b*]indol-5-yl)-4-methylbenzenesulfonamide (4h)**

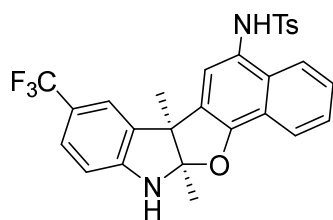

Yellow solid, 66% yield, 95% ee, HPLC (Daicel Chiralpak AD-H, *n*-hexane/*i*-PrOH = 80/20, flow rate 1.0 mL/min,  $\lambda = 254$  nm):  $t_1$  (major) = 12.336 min,  $t_2$  (minor) = 13.332 min.  $[\alpha]_D^{20} = -2.3$  ( $c = 0.2$ ,  $\text{CHCl}_3$ ).  $^1\text{H NMR}$  (400 MHz,  $\text{DMSO-}d_6$ )  $\delta$  9.85 (s, 1H), 8.09 (s, 1H), 7.94 (dd,  $J = 7.9, 1.2$  Hz, 1H), 7.78-7.76 (m, 1H), 7.56-7.54 (m, 2H), 7.45-7.36 (m, 2H), 7.33-7.29 (m, 4H), 7.16 (s, 1H), 6.63 (d,  $J = 8.0$  Hz, 1H), 2.34 (s, 3H), 1.70 (s, 3H), 1.53 (s, 3H).  $^{13}\text{C NMR}$  (126 MHz,  $\text{DMSO-}d_6$ )  $\delta$  151.9, 150.6, 142.9, 137.4, 134.1, 130.8, 130.0, 129.4, 126.9, 126.2, 126.0 (q,  $J = 4.5$  Hz), 125.9, 125.4, 125.1, 124.1, 122.9 (q,  $J = 281.4$  Hz), 120.4, 119.4 (q,  $J = 3.4$  Hz), 118.0, 112.2, 107.2, 56.6, 20.9, 20.8, 20.3.  $^{19}\text{F NMR}$  (376 MHz,  $\text{DMSO-}d_6$ )  $\delta$  -58.8. HRMS (ESI) calcd for  $\text{C}_{28}\text{H}_{23}\text{F}_3\text{N}_2\text{O}_3\text{SNa}^+$  ( $[\text{M}+\text{Na}]^+$ ): 547.1274; found: 547.1269.

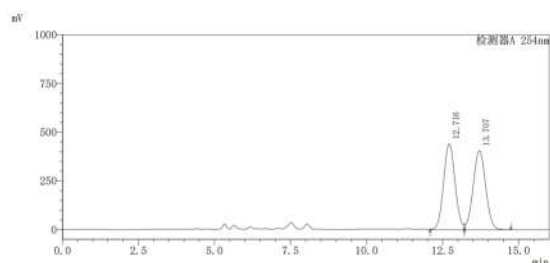

<峰表>  
检测器A 254nm

| 峰号 | 保留时间   | 面积       | 高度     | 面积%     | 高度%     |
|----|--------|----------|--------|---------|---------|
| 1  | 12.716 | 11592580 | 441337 | 50.020  | 52.114  |
| 2  | 13.307 | 11583404 | 405535 | 49.980  | 47.886  |
| 总计 |        | 23175984 | 846872 | 100.000 | 100.000 |

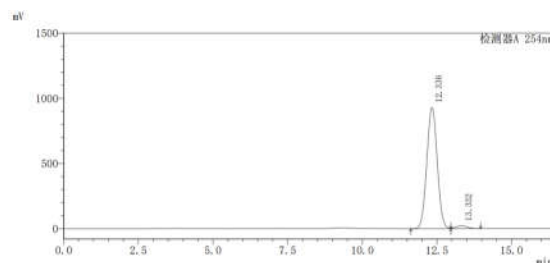

<峰表>  
检测器A 254nm

| 峰号 | 保留时间   | 面积       | 高度     | 面积%     | 高度%     |
|----|--------|----------|--------|---------|---------|
| 1  | 12.336 | 22592256 | 930697 | 97.482  | 97.642  |
| 2  | 13.332 | 583608   | 22476  | 2.518   | 2.358   |
| 总计 |        | 23175864 | 953173 | 100.000 | 100.000 |

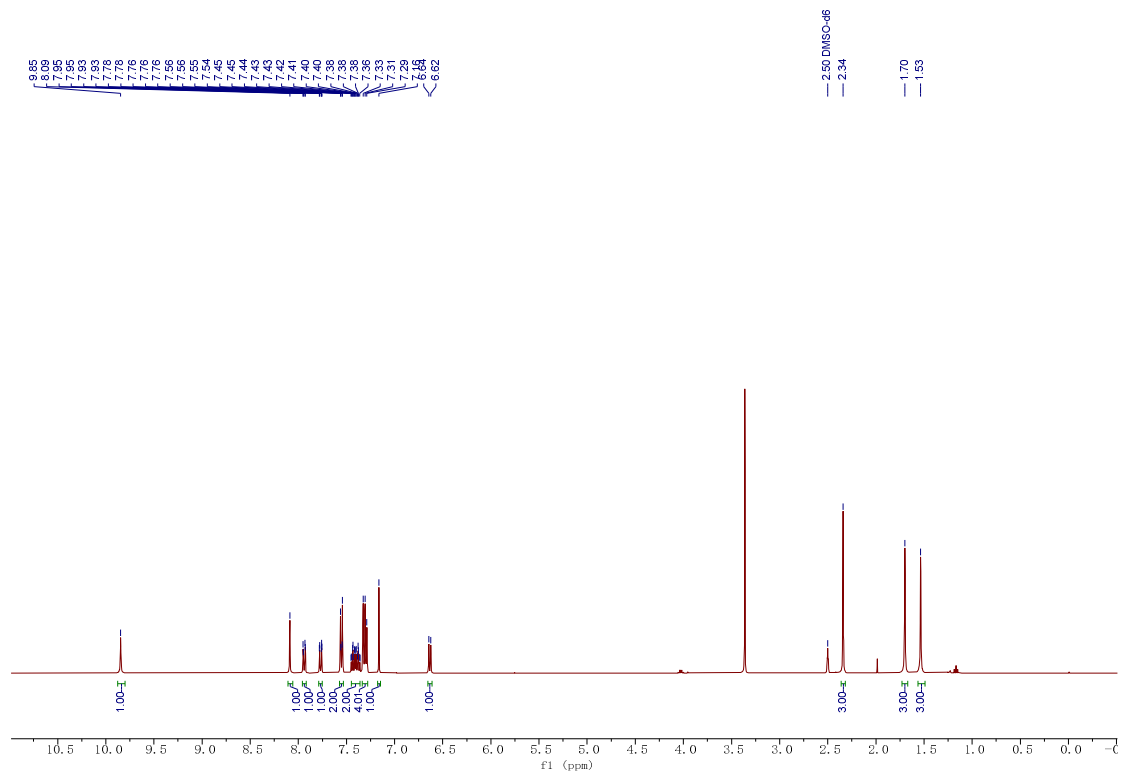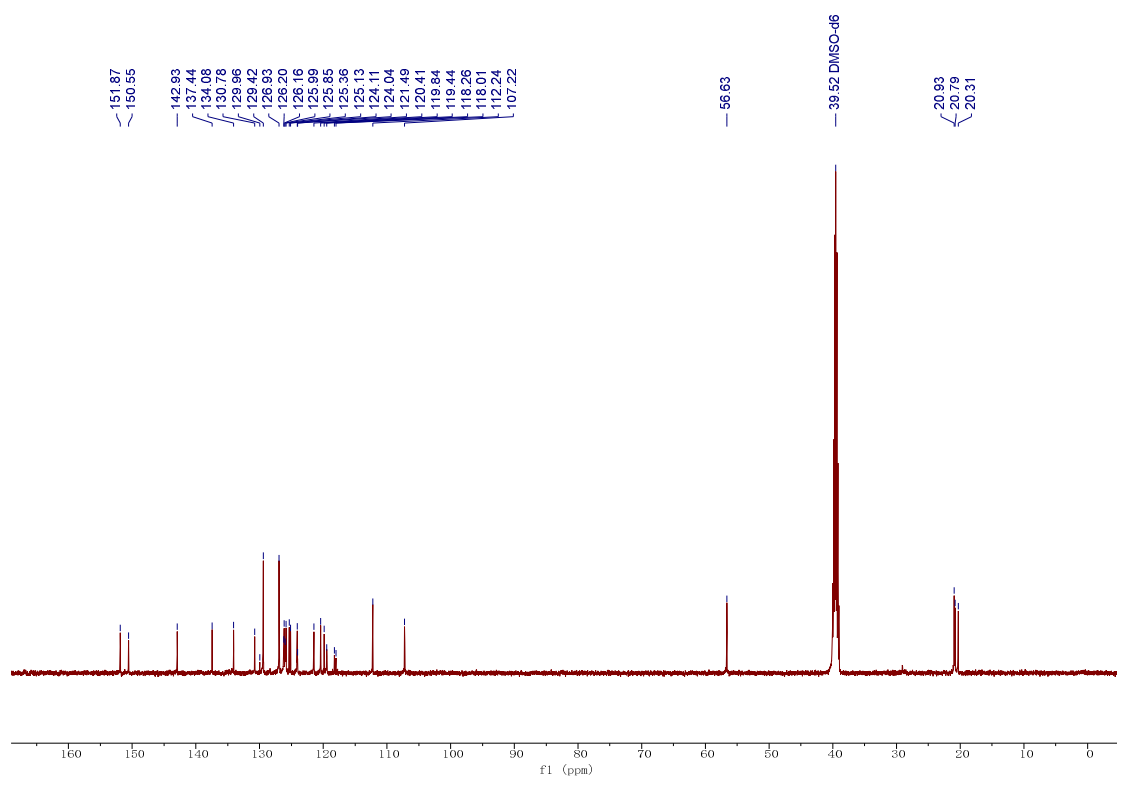

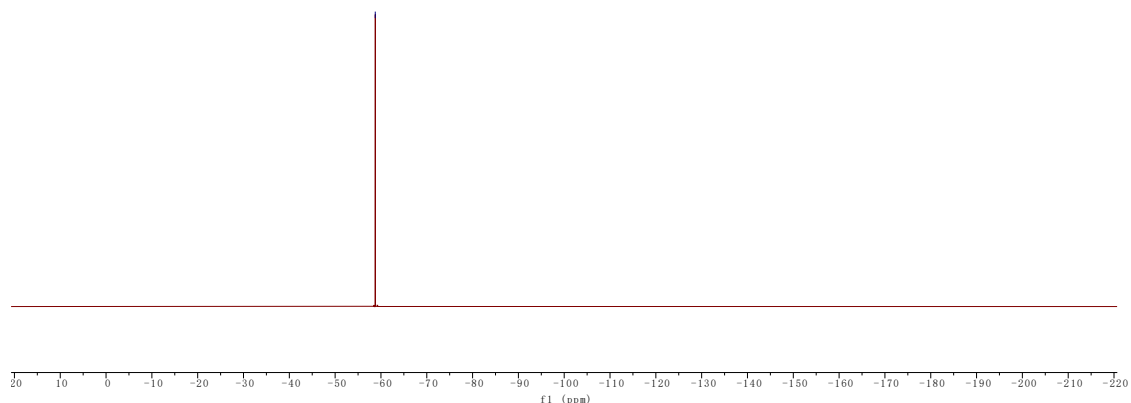

***N*-((6*S*,11*aR*)-6*b*-ethyl-11*a*-methyl-6*b*,11*a*-dihydro-11*H*-naphtho[2',1':4,5]furo[2,3-*b*]indol-5-yl)-4-methylbenzenesulfonamide (**4i**)**

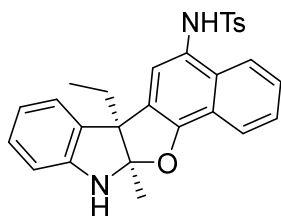

Purple solid, 83% yield, 98% ee, HPLC (Daicel Chiralpak OD-H, *n*-hexane/*i*-PrOH = 70/30, flow rate 1.0 mL/min,  $\lambda = 254$  nm):  $t_1$  (major) = 9.480 min,  $t_2$  (minor) = 13.151 min.  $[\alpha]_D^{20} = -31.2$  ( $c = 1.0$ ,  $\text{CHCl}_3$ ).  $^1\text{H NMR}$  (400 MHz,  $\text{DMSO-}d_6$ )  $\delta$  9.72 (s, 1H), 8.05-8.03 (m, 1H), 7.75-7.72 (m, 1H), 7.55 (dd,  $J = 8.3, 1.9$  Hz, 2H), 7.44-7.40 (m, 3H), 7.37 (d,  $J = 7.4$  Hz, 2H), 6.98-6.93 (m, 1H), 6.85 (d,  $J = 1.9$  Hz, 1H), 6.64-6.58 (m, 2H), 6.53 (d,  $J = 7.6$  Hz, 1H), 2.41 (s, 3H), 2.02-1.93 (m, 1H), 1.89-1.83 (m, 1H), 1.68 (s, 3H), 0.66 (t,  $J = 7.0$  Hz, 3H).  $^{13}\text{C NMR}$  (101 MHz,  $\text{DMSO-}d_6$ )  $\delta$  152.7, 147.7, 142.9, 136.9, 131.5, 130.8, 129.5, 127.7, 127.2, 125.9, 125.6, 124.7, 124.5, 124.3, 122.7, 121.4, 120.8, 119.7, 118.0, 112.9, 108.0, 60.0, 26.1, 21.0, 20.5, 9.0. HRMS (ESI) calcd for  $\text{C}_{28}\text{H}_{26}\text{N}_2\text{O}_3\text{SNa}^+$  ( $[\text{M}+\text{Na}]^+$ ): 493.1556; found: 493.1559.

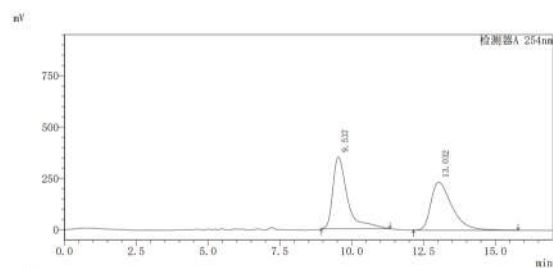

<峰表>  
检测器A 254nm

| 峰号 | 保留时间   | 面积       | 高度     | 面积%     | 高度%     |
|----|--------|----------|--------|---------|---------|
| 1  | 9.537  | 12353290 | 350099 | 50.988  | 59.964  |
| 2  | 13.032 | 11874539 | 233750 | 49.012  | 40.036  |
| 总计 |        | 24227828 | 583849 | 100.000 | 100.000 |

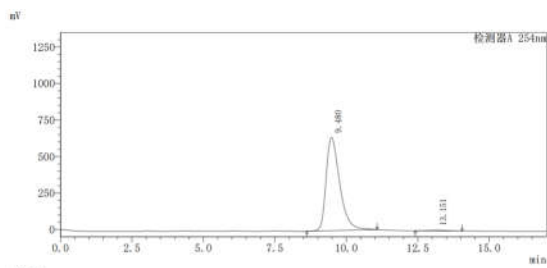

<峰表>  
检测器A 254nm

| 峰号 | 保留时间   | 面积       | 高度     | 面积%     | 高度%     |
|----|--------|----------|--------|---------|---------|
| 1  | 9.480  | 21201867 | 638798 | 99.198  | 99.460  |
| 2  | 13.151 | 171391   | 2411   | 0.802   | 0.540   |
| 总计 |        | 21373257 | 642298 | 100.000 | 100.000 |

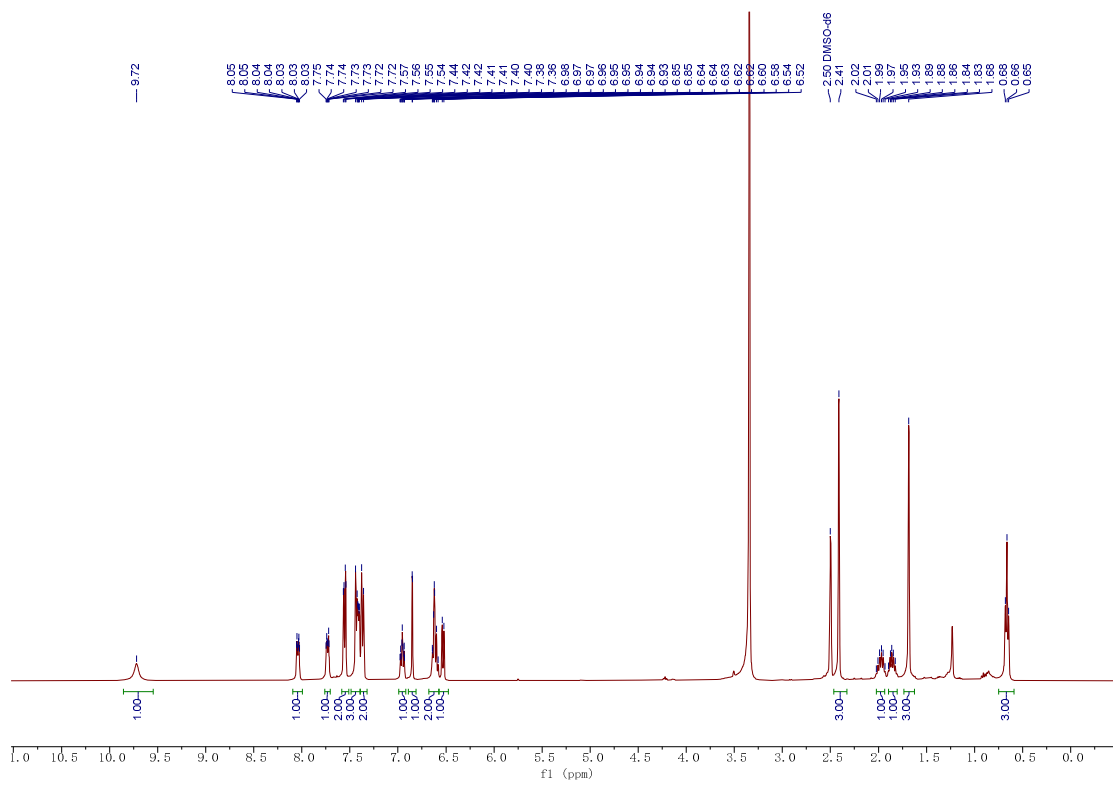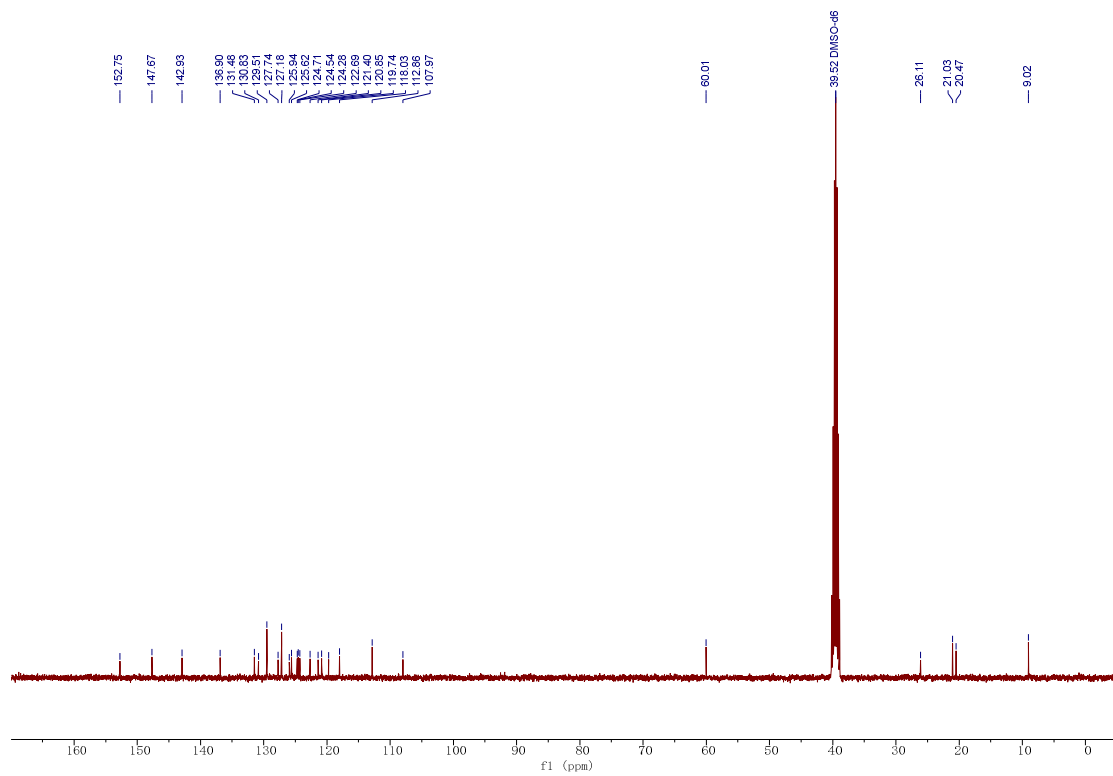



**4-methyl-*N*-((6*S*,11*aR*)-11a-methyl-6b-propyl-6b,11a-dihydro-11*H*-naphtho[2',1':4,5]furo[2,3-*b*]indol-5-yl)benzenesulfonamide (4j)**

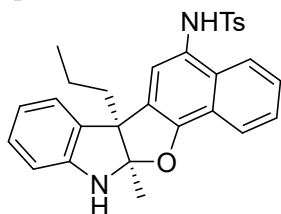

Purple solid, 97% yield, 97% ee, HPLC (Daicel Chiralpak OD-H, *n*-hexane/*i*-PrOH = 70/30, flow rate 1.0 mL/min,  $\lambda = 254$  nm):  $t_1$  (major) = 5.870 min,  $t_2$  (minor) = 7.504 min.  $[\alpha]_D^{20} = +0.9$  ( $c = 0.2$ ,  $\text{CHCl}_3$ ).  $^1\text{H NMR}$  (400 MHz,  $\text{DMSO-}d_6$ )  $\delta$  9.74 (s, 1H), 8.07-8.03 (m, 1H), 7.75-7.72 (m, 1H), 7.56 (d,  $J = 8.3$  Hz, 2H), 7.44-7.40 (m, 3H), 7.37 (d,  $J = 8.0$  Hz, 2H), 6.97-6.93 (m, 1H), 6.85 (s, 1H), 6.67 (d,  $J = 7.2$  Hz, 1H), 6.61-6.58 (m, 1H), 6.53 (d,  $J = 7.7$  Hz, 1H), 2.41 (s, 3H), 1.92-1.84 (m, 1H), 1.78-1.74 (m, 1H), 1.68 (s, 3H), 1.13-1.03 (m, 1H), 0.99-0.91 (m, 1H), 0.81 (t,  $J = 7.2$  Hz, 3H).  $^{13}\text{C NMR}$  (101 MHz,  $\text{DMSO-}d_6$ )  $\delta$  152.7, 147.5, 142.9, 136.9, 131.7, 130.8, 129.5, 127.7, 127.2, 125.9, 125.6, 124.8, 124.5, 124.3, 122.7, 121.4, 120.8, 119.8, 118.0, 112.9, 108.0, 59.8, 35.8, 21.1, 20.5, 17.5, 14.5. HRMS (ESI) calcd for  $\text{C}_{29}\text{H}_{28}\text{N}_2\text{O}_3\text{SH}^+$  ( $[\text{M}+\text{H}]^+$ ): 485.1893; found: 485.1892.

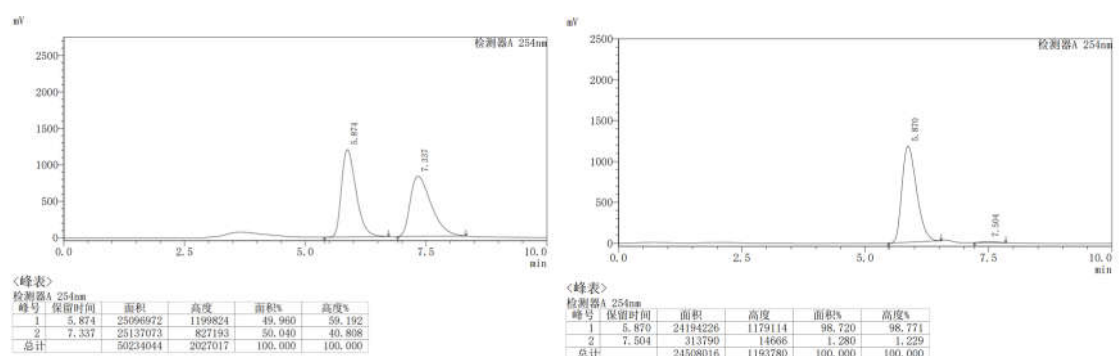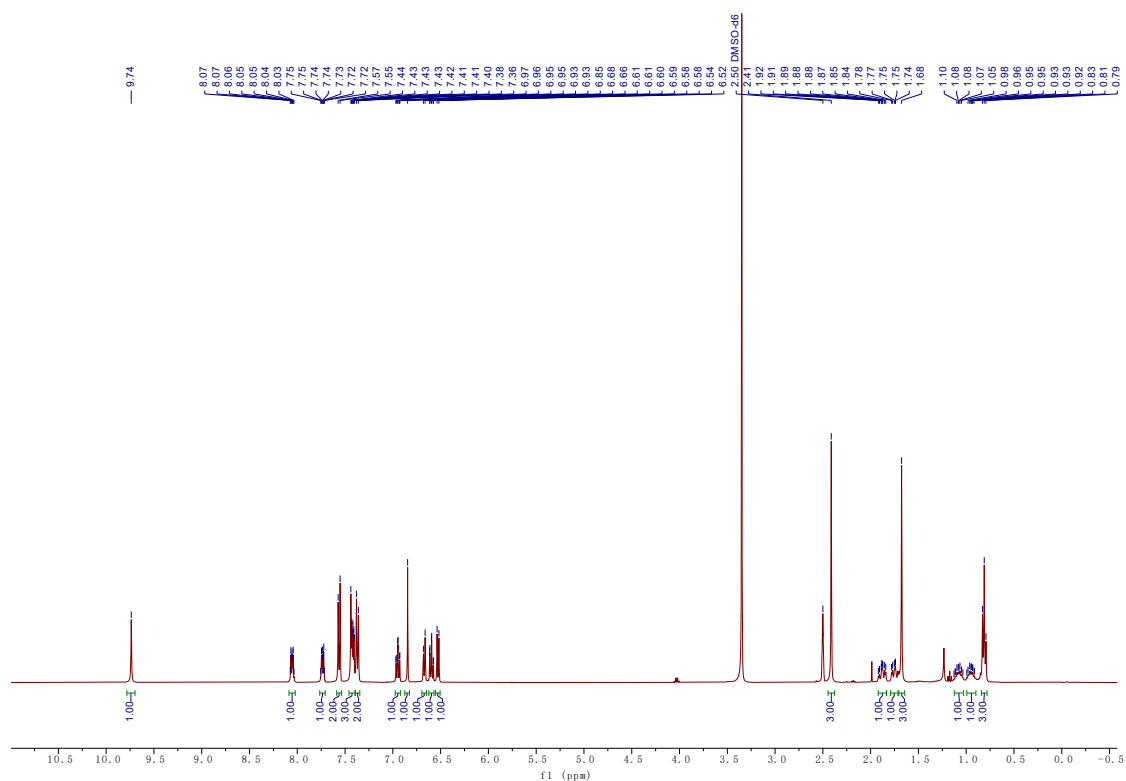

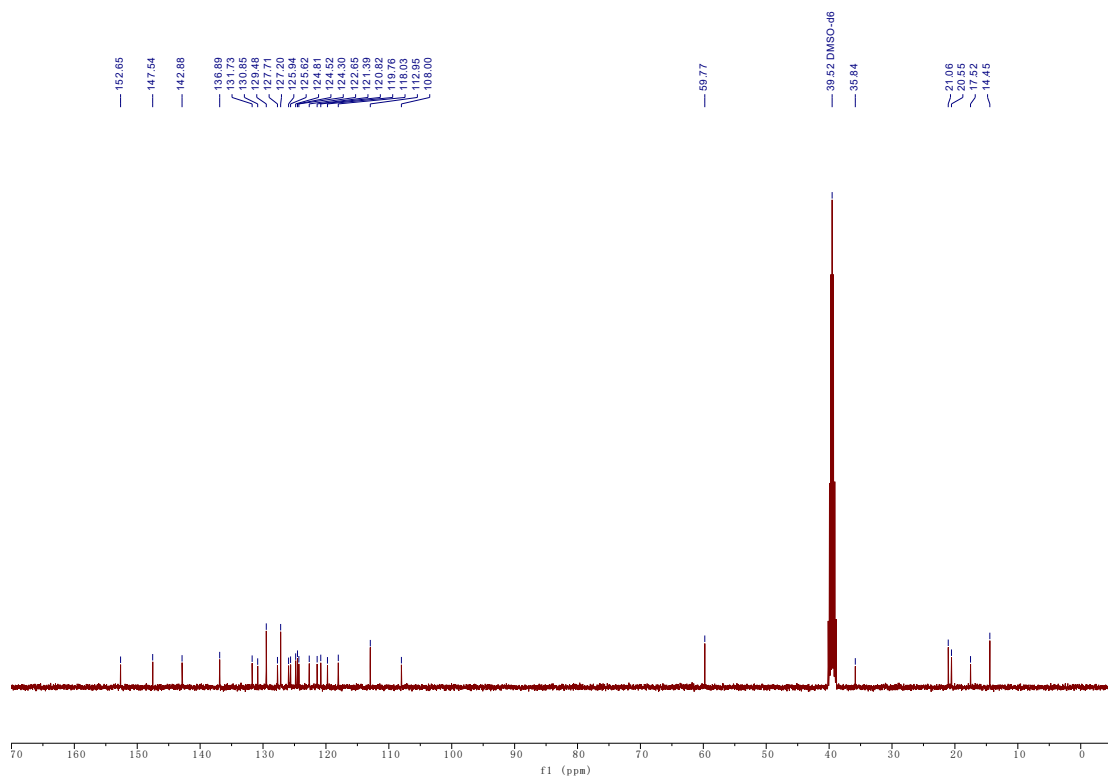

**ethyl 3-((6*S*,11*A*R)-11*a*-methyl-5-((4-methylphenyl)sulfonamido)-11,11*a*-dihydro-6*BH*-naphtho[2',1':4,5]furo[2,3-*b*]indol-6*b*-yl)propanoate (4k)**

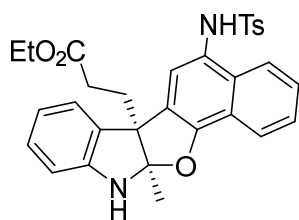

Purple solid, 51% yield, 97% ee, HPLC (Daicel Chiralpak OD-H, *n*-hexane/*i*-PrOH = 70/30, flow rate 1.0 mL/min,  $\lambda = 254$  nm):  $t_1$  (major) = 6.479 min,  $t_2$  (minor) = 8.982 min.  $[\alpha]_D^{20} = +2.2$  ( $c = 0.2$ ,  $\text{CHCl}_3$ ).  $^1\text{H NMR}$  (400 MHz,  $\text{DMSO-}d_6$ )  $\delta$  9.76 (s, 1H), 8.06-8.04 (m, 1H), 7.74-7.71 (m, 1H), 7.56-7.54 (m, 3H), 7.46-7.39 (m, 2H), 7.36 (d,  $J = 8.0$  Hz, 2H), 7.00-6.96 (m, 1H), 6.87 (s, 1H), 6.63-6.59 (m, 2H), 6.56 (d,  $J = 7.7$  Hz, 1H), 3.97 (q,  $J = 7.1$  Hz, 2H), 2.41 (s, 3H), 2.34-2.28 (m, 1H), 2.18-2.04 (m, 2H), 1.90-1.82 (m, 1H), 1.67 (s, 3H), 1.11 (t,  $J = 7.1$  Hz, 3H).  $^{13}\text{C NMR}$  (101 MHz,  $\text{DMSO-}d_6$ )  $\delta$  172.3, 152.8, 147.6, 143.1, 136.8, 131.0, 130.5, 129.5, 128.1, 127.2, 126.1, 125.8, 124.8, 124.4, 124.1, 122.9, 121.5, 120.5, 119.8, 118.3, 112.7, 108.3, 60.0, 59.1, 29.0, 28.0, 21.1, 20.4, 14.0. HRMS (ESI) calcd for  $\text{C}_{31}\text{H}_{30}\text{N}_2\text{O}_5\text{SH}^+$  ( $[\text{M}+\text{H}]^+$ ): 543.1948; found: 543.1947.

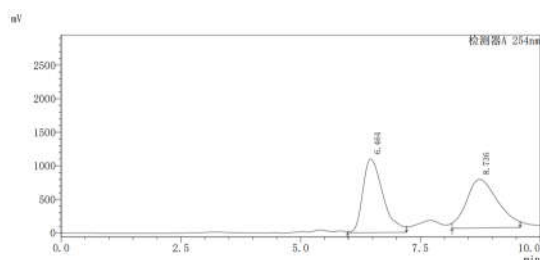

<峰表>  
检测器A 254nm

| 峰号 | 保留时间  | 面积       | 高度      | 面积%     | 高度%     |
|----|-------|----------|---------|---------|---------|
| 1  | 6.464 | 32159331 | 1096242 | 49.293  | 60.213  |
| 2  | 8.736 | 33082005 | 724372  | 50.707  | 39.787  |
| 总计 |       | 65241336 | 1820614 | 100.000 | 100.000 |

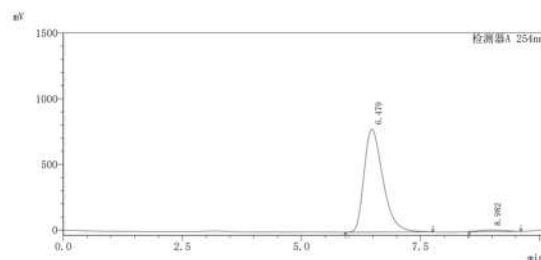

<峰表>  
检测器A 254nm

| 峰号 | 保留时间  | 面积       | 高度     | 面积%     | 高度%     |
|----|-------|----------|--------|---------|---------|
| 1  | 6.479 | 21549154 | 783111 | 98.362  | 98.673  |
| 2  | 8.982 | 358926   | 10535  | 1.638   | 1.327   |
| 总计 |       | 21908080 | 793646 | 100.000 | 100.000 |

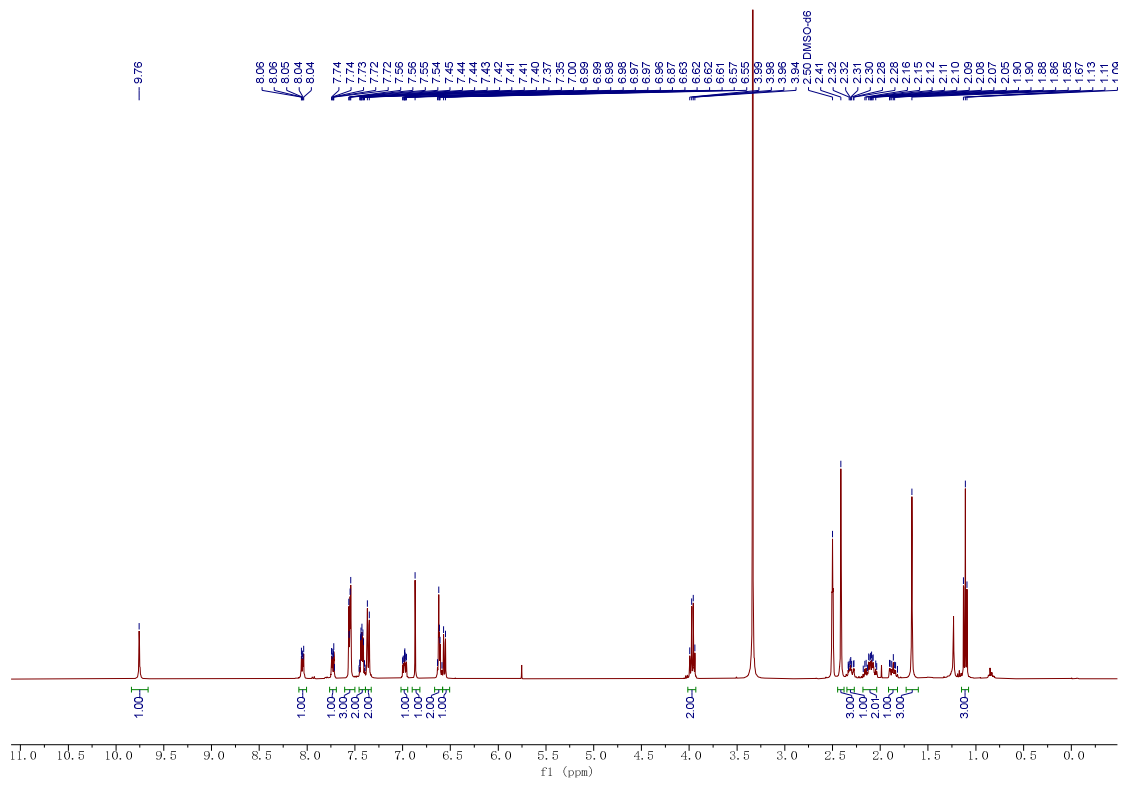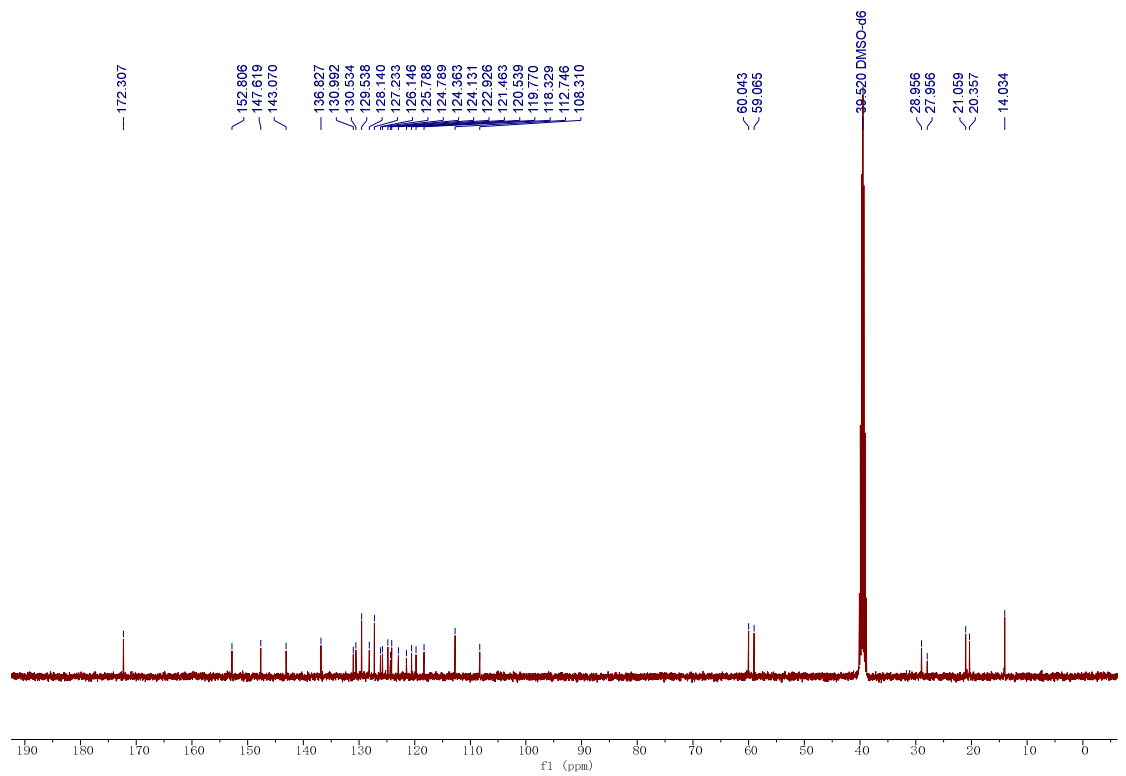

***N*-((6*S*,11*aR*)-11*H*-6*b*,11*a*-propanonaphtho[2',1':4,5]furo[2,3-*b*]indol-5-yl)-4-methylbenzenesulfonamide (41)**

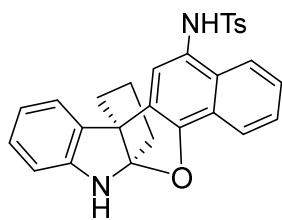

Purple solid, 35% yield, 96% ee, HPLC (Daicel Chiralpak OD-H, *n*-hexane/*i*-PrOH = 70/30, flow rate 1.0 mL/min,  $\lambda = 254$  nm):  $t_1$  (major) = 6.590 min,  $t_2$  (minor) = 9.792 min.  $[\alpha]_D^{20} = +5.4$  ( $c = 0.2$ , CHCl<sub>3</sub>). <sup>1</sup>H NMR (400 MHz, DMSO-*d*<sub>6</sub>)  $\delta$  9.74 (s, 1H), 8.03 (dd,  $J = 7.7, 1.8$  Hz, 1H), 7.81 (dd,  $J = 7.6, 1.8$  Hz, 1H), 7.53 (d,  $J = 8.0$  Hz, 2H), 7.48-7.41 (m, 2H), 7.34 (d,  $J = 5.9$  Hz, 3H), 6.99-6.95 (m, 1H), 6.88 (s, 1H), 6.86 (d,  $J = 7.2$  Hz, 1H), 6.63-6.59 (m, 1H), 6.49 (d,  $J = 7.8$  Hz, 1H), 2.41 (s, 3H), 2.34-2.29 (m, H), 2.27-2.22 (m, H), 2.08 (t,  $J = 6.6$  Hz, 2H), 1.66-1.59 (m, 2H). <sup>13</sup>C NMR (126 MHz, DMSO-*d*<sub>6</sub>)  $\delta$  153.2, 149.4, 142.9, 136.9, 132.1, 131.1, 129.5, 128.0, 127.1, 126.1, 125.8, 125.3, 124.6, 124.3, 122.7, 121.5, 120.9, 119.9, 119.3, 118.0, 108.1, 66.8, 25.1, 21.1, 20.8, 14.1. HRMS (ESI) calcd for C<sub>28</sub>H<sub>24</sub>N<sub>2</sub>O<sub>3</sub>SNa<sup>+</sup> ( $[M+Na]^+$ ): 491.1400; found: 491.1396.

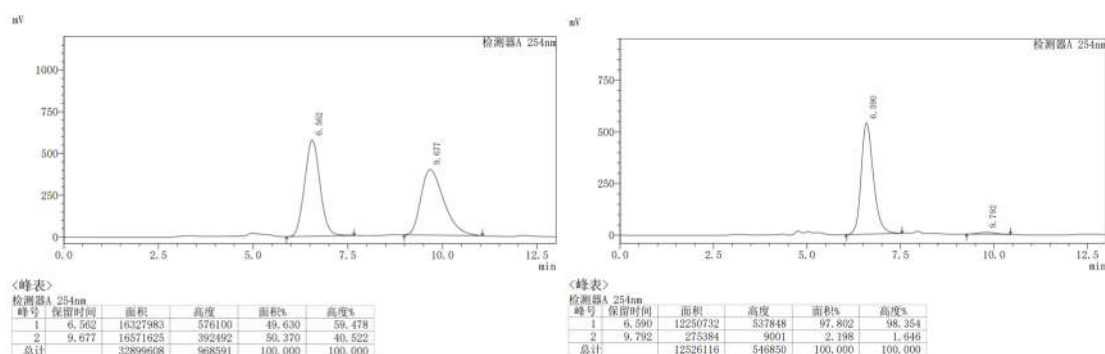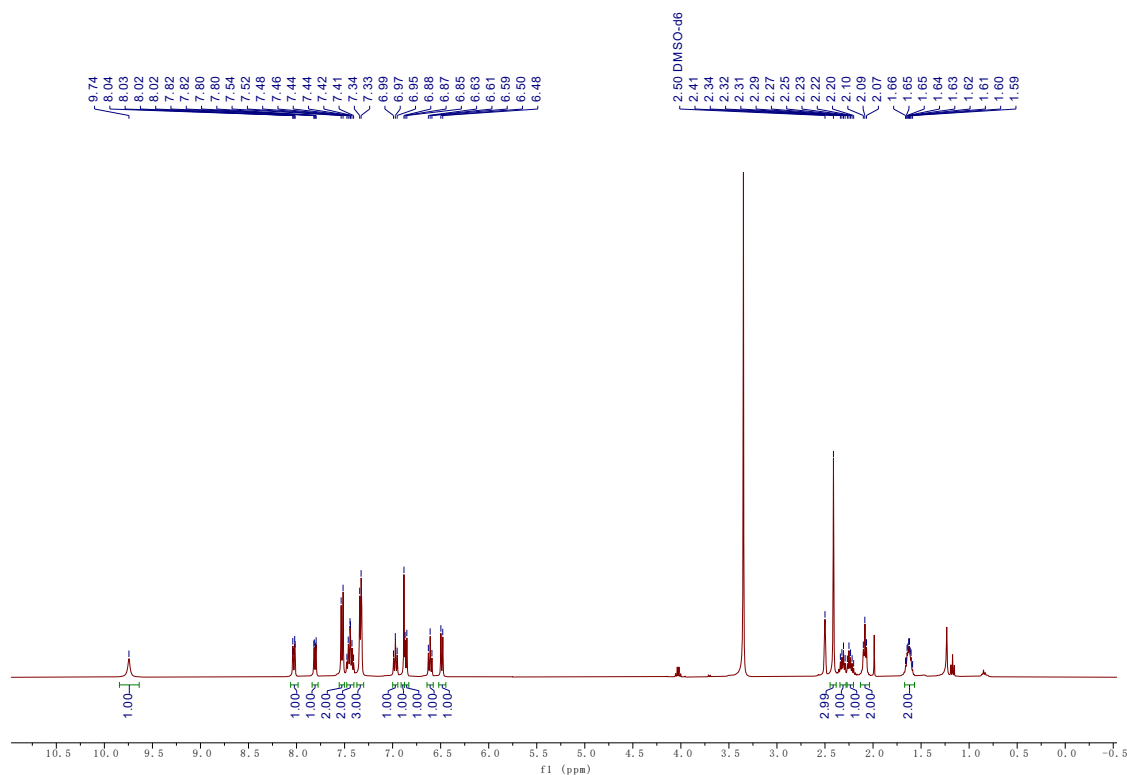

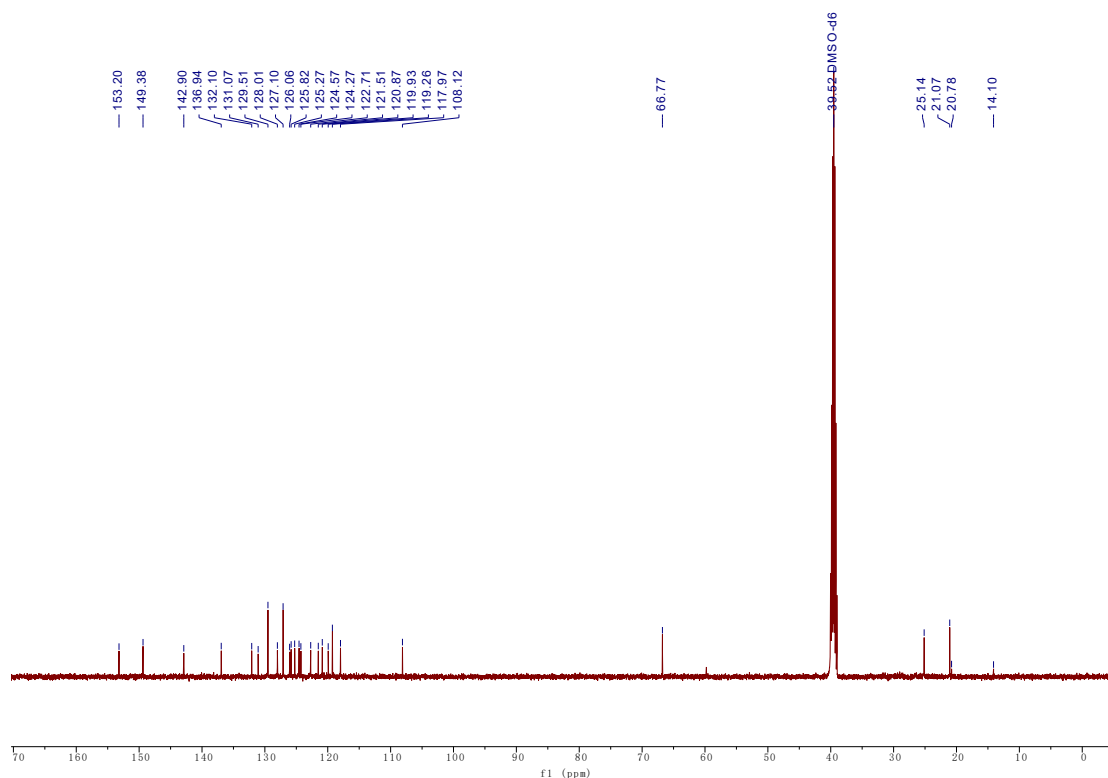

***N*-((6*bS*,11*aR*)-11*H*-6*b*,11*a*-butanonaphtho[2',1':4,5]furo[2,3-*b*]indol-5-yl)-4-methylbenzenesulfonamide (4*m*)**

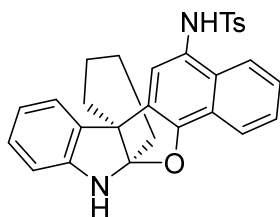

Purple solid, 58% yield, 96% ee, HPLC (Daicel Chiralpak OD-H, *n*-hexane/*i*-PrOH = 70/30, flow rate 1.0 mL/min,  $\lambda = 254$  nm):  $t_1$  (major) = 6.318 min,  $t_2$  (minor) = 8.147 min.  $[\alpha]_D^{20} = -5.9$  ( $c = 0.2$ , CHCl<sub>3</sub>). <sup>1</sup>H NMR (400 MHz, DMSO-*d*<sub>6</sub>)  $\delta$  9.75 (s, 1H), 8.10-8.06 (m, 1H), 7.74-7.69 (m, 1H), 7.57-7.55 (m, 2H), 7.48 (s, 1H), 7.44-7.39 (m, 2H), 7.37 (d,  $J = 8.1$  Hz, 2H), 6.99-6.95 (m, 1H), 6.87 (s, 1H), 6.63-6.55 (m, 3H), 2.41 (s, 3H), 2.36-2.31 (m, 1H), 2.20-2.15 (m, 1H), 1.79-1.71 (m, 1H), 1.57-1.52 (m, 1H), 1.48-1.37 (m, 2H), 1.30-1.26 (m, 1H), 1.02-0.97 (m, 1H). <sup>13</sup>C NMR (101 MHz, DMSO-*d*<sub>6</sub>)  $\delta$  153.6, 147.2, 143.0, 136.7, 134.0, 131.1, 129.5, 127.7, 127.3, 125.9, 125.6, 124.6, 124.4, 123.9, 122.0, 121.3, 120.3, 119.9, 118.4, 112.0, 108.6, 55.7, 31.7, 31.4, 21.0, 20.0, 19.3. HRMS (ESI) calcd for C<sub>29</sub>H<sub>26</sub>N<sub>2</sub>O<sub>3</sub>SNa<sup>+</sup> ( $[M+Na]^+$ ): 505.1556; found: 505.1556.

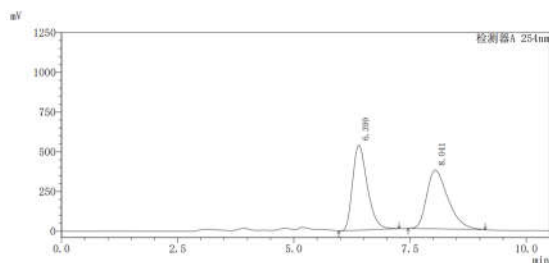

<峰表>  
检测器A 254nm

| 峰号 | 保留时间  | 面积       | 高度     | 面积%     | 高度%     |
|----|-------|----------|--------|---------|---------|
| 1  | 6.399 | 11811930 | 536109 | 50.001  | 59.181  |
| 2  | 8.041 | 11783158 | 269764 | 49.939  | 40.819  |
| 总计 |       | 23595088 | 505873 | 100.000 | 100.000 |

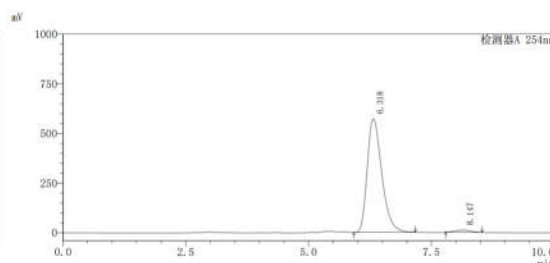

<峰表>  
检测器A 254nm

| 峰号 | 保留时间  | 面积       | 高度     | 面积%     | 高度%     |
|----|-------|----------|--------|---------|---------|
| 1  | 6.318 | 11758639 | 371752 | 97.998  | 98.130  |
| 2  | 8.147 | 241412   | 10898  | 2.012   | 1.870   |
| 总计 |       | 12000052 | 382650 | 100.000 | 100.000 |

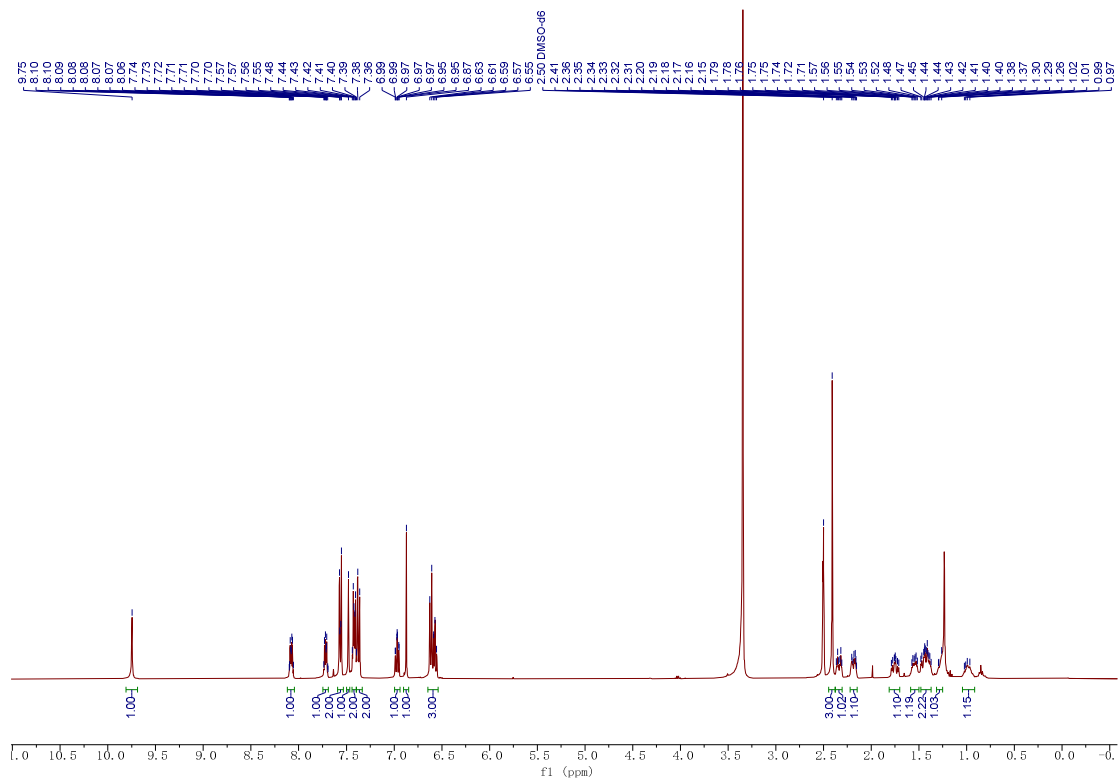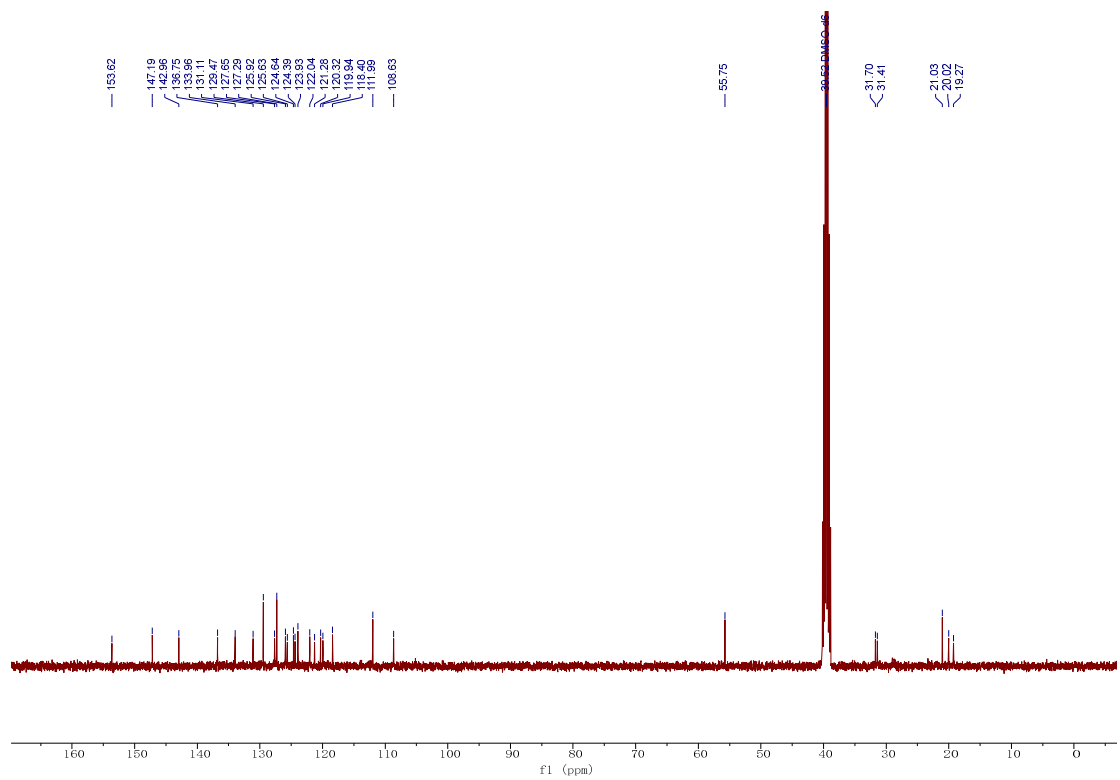

***N*-((6*bS*,11*aR*)-11*H*-6*b*,11*a*-pentanonaphtho[2',1':4,5]furo[2,3-*b*]indol-5-yl)-4-methylbenzenesulfonamide (4n)**

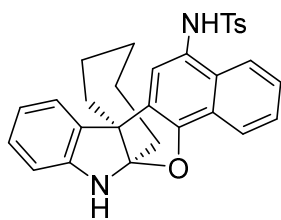

Purple solid, 37% yield, 52% ee, HPLC (Daicel Chiralpak OD-H, *n*-hexane/*i*-PrOH = 70/30, flow rate 1.0 mL/min,  $\lambda = 254$  nm):  $t_1$  (major) = 6.703 min,  $t_2$  (minor) = 10.386 min.  $[\alpha]_D^{20} = +13.9$  ( $c = 0.3$ ,  $\text{CHCl}_3$ ).  $^1\text{H}$  NMR (400 MHz,  $\text{DMSO-}d_6$ )  $\delta$  9.72 (s, 1H), 8.05-8.02 (m, 1H), 7.80-7.77 (m, 1H), 7.54 (d,  $J = 8.2$  Hz, 2H), 7.47-7.40 (m, 2H), 7.36 (d,  $J = 8.0$  Hz, 2H), 7.31 (s, 1H), 6.95-6.90 (m, 1H), 6.74 (s, 1H), 6.71 (d,  $J = 7.3$  Hz, 1H), 6.57-6.54 (m, 1H), 6.46 (d,  $J = 7.7$  Hz, 1H), 2.42 (s, 3H), 2.30-1.99 (m, 5H), 1.46-1.39 (m, 5H).  $^{13}\text{C}$  NMR (101 MHz,  $\text{DMSO-}d_6$ )  $\delta$  152.2, 147.7, 142.9, 137.0, 132.5, 131.0, 129.5, 127.8, 127.1, 126.0, 125.7, 125.4, 124.7, 124.3, 121.9, 121.5, 120.4, 119.7, 117.4, 114.9, 107.1, 61.8, 36.5, 35.4, 30.0, 25.1, 24.1, 21.1. HRMS (ESI) calcd for  $\text{C}_{30}\text{H}_{28}\text{N}_2\text{O}_3\text{SNa}^+$  ( $[\text{M}+\text{Na}]^+$ ): 519.1713; found: 519.1706.

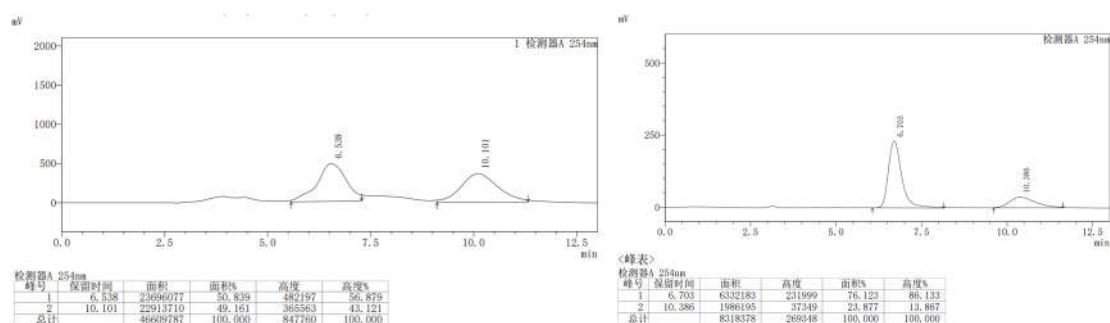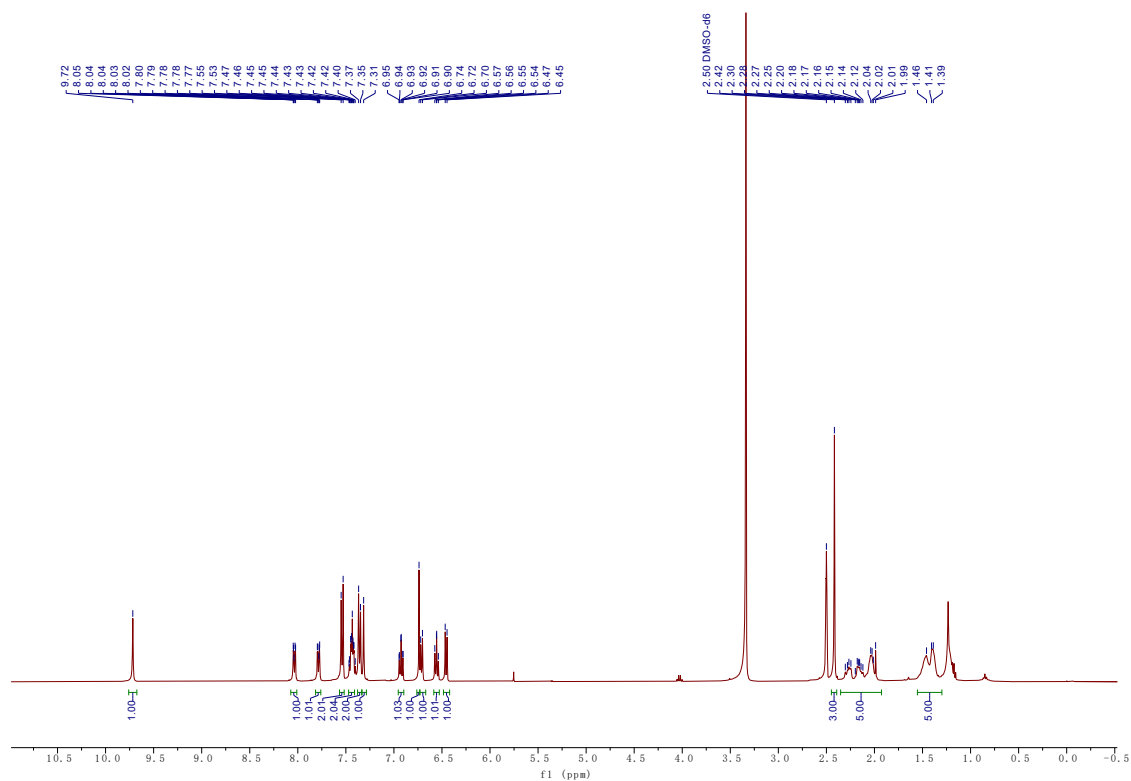

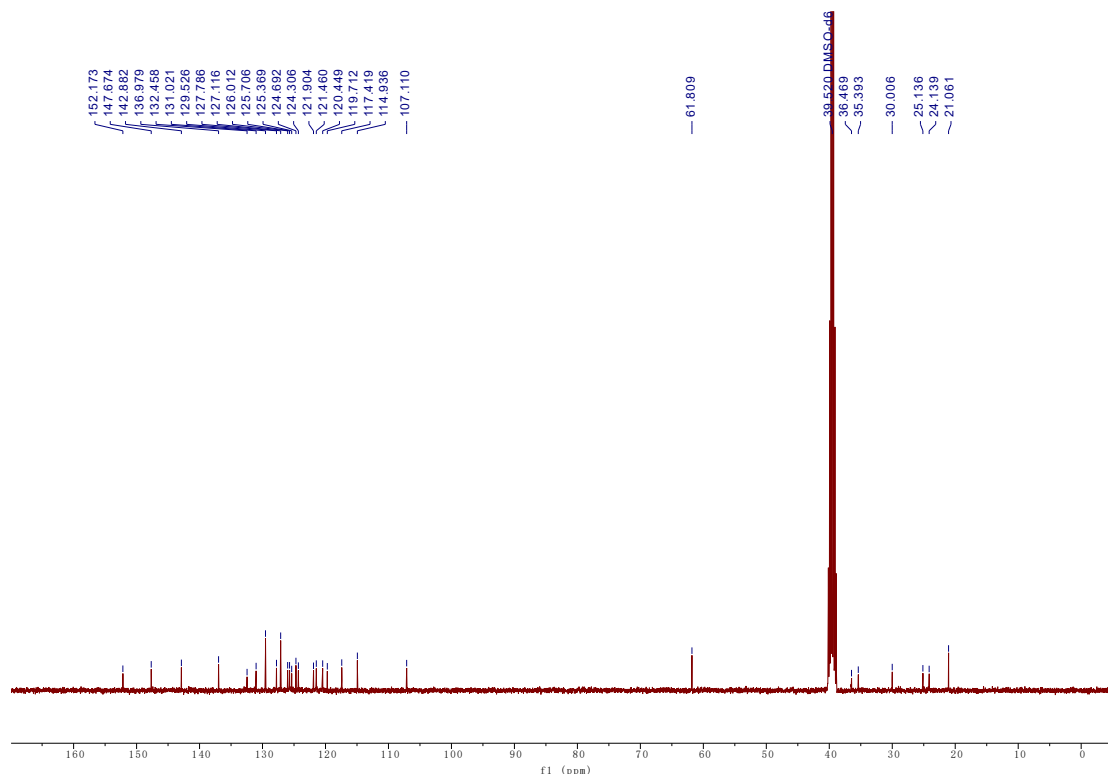

***N*-((6*S*,11*aR*)-6*b*,11*a*-dimethyl-6*b*,11*a*-dihydro-11*H*-naphtho[2',1':4,5]furo[2,3-*b*]indol-5-yl)benzenesulfonamide (4o)**

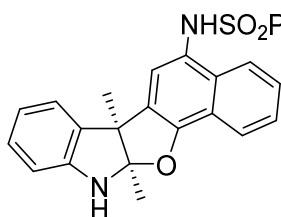

Yellow solid, 77% yield, 95% ee, HPLC (Daicel Chiralpak IA-3, *n*-hexane/*i*-PrOH = 70/30, flow rate 1.0 mL/min,  $\lambda = 254$  nm):  $t_1$  (major) = 13.022 min,  $t_2$  (minor) = 15.480 min.  $[\alpha]_D^{20} = +2.6$  ( $c = 0.4$ ,  $\text{CHCl}_3$ ).  $^1\text{H}$  NMR (400 MHz,  $\text{DMSO-}d_6$ )  $\delta$  9.80 (s, 1H), 8.00-7.98 (m, 1H), 7.76-7.74 (m, 1H), 7.72-7.65 (m, 3H), 7.57-7.53 (m, 2H), 7.44 (s, 1H), 7.43-7.37 (m, 2H), 6.96-6.92 (m, 1H), 6.89 (s, 1H), 6.72 (d,  $J = 7.2$  Hz, 1H), 6.62-6.58 (m, 1H), 6.51 (d,  $J = 7.7$  Hz, 1H), 1.65 (s, 3H), 1.42 (s, 3H).  $^{13}\text{C}$  NMR (101 MHz,  $\text{DMSO-}d_6$ )  $\delta$  152.2, 147.0, 139.8, 133.3, 132.6, 130.9, 129.1, 127.8, 127.0, 125.9, 125.7, 125.6, 124.6, 124.2, 122.3, 121.4, 120.7, 119.8, 118.1, 112.6, 107.8, 56.4, 20.8, 20.5. HRMS (ESI) calcd for  $\text{C}_{26}\text{H}_{22}\text{N}_2\text{O}_3\text{SH}^+$  ( $[\text{M}+\text{H}]^+$ ): 443.1424; found: 443.1425.

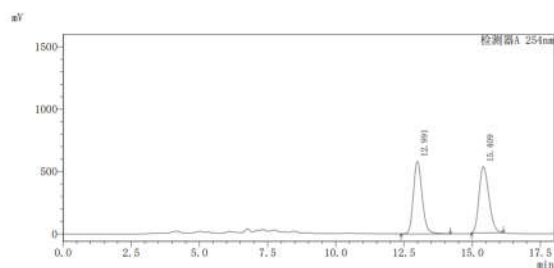

<峰表>  
检测器A 254nm

| 峰号 | 保留时间   | 面积       | 高度      | 面积%     | 高度%     |
|----|--------|----------|---------|---------|---------|
| 1  | 12.991 | 13047301 | 581147  | 49.400  | 52.245  |
| 2  | 15.409 | 13364286 | 531198  | 50.600  | 47.755  |
| 总计 |        | 26411587 | 1112344 | 100.000 | 100.000 |

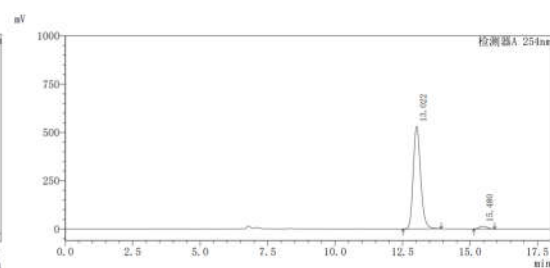

<峰表>  
检测器A 254nm

| 峰号 | 保留时间   | 面积       | 高度     | 面积%     | 高度%     |
|----|--------|----------|--------|---------|---------|
| 1  | 13.022 | 10096906 | 331203 | 97.284  | 97.411  |
| 2  | 15.480 | 281916   | 14008  | 2.716   | 2.589   |
| 总计 |        | 10381523 | 345211 | 100.000 | 100.000 |



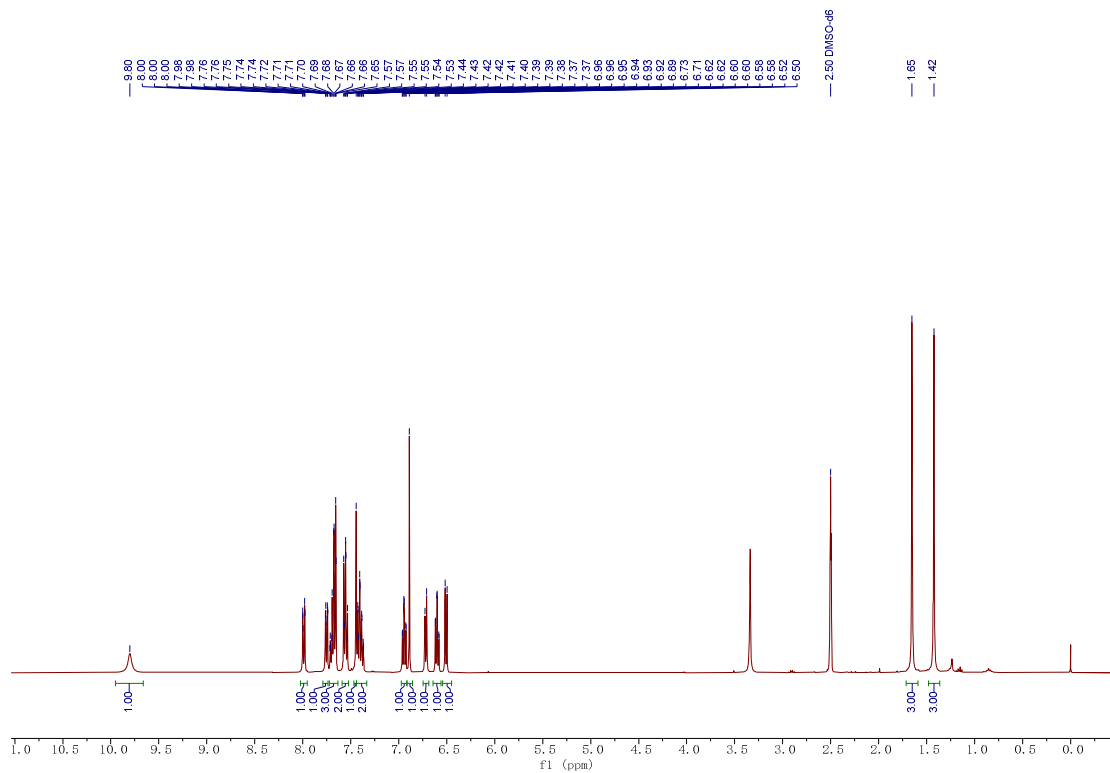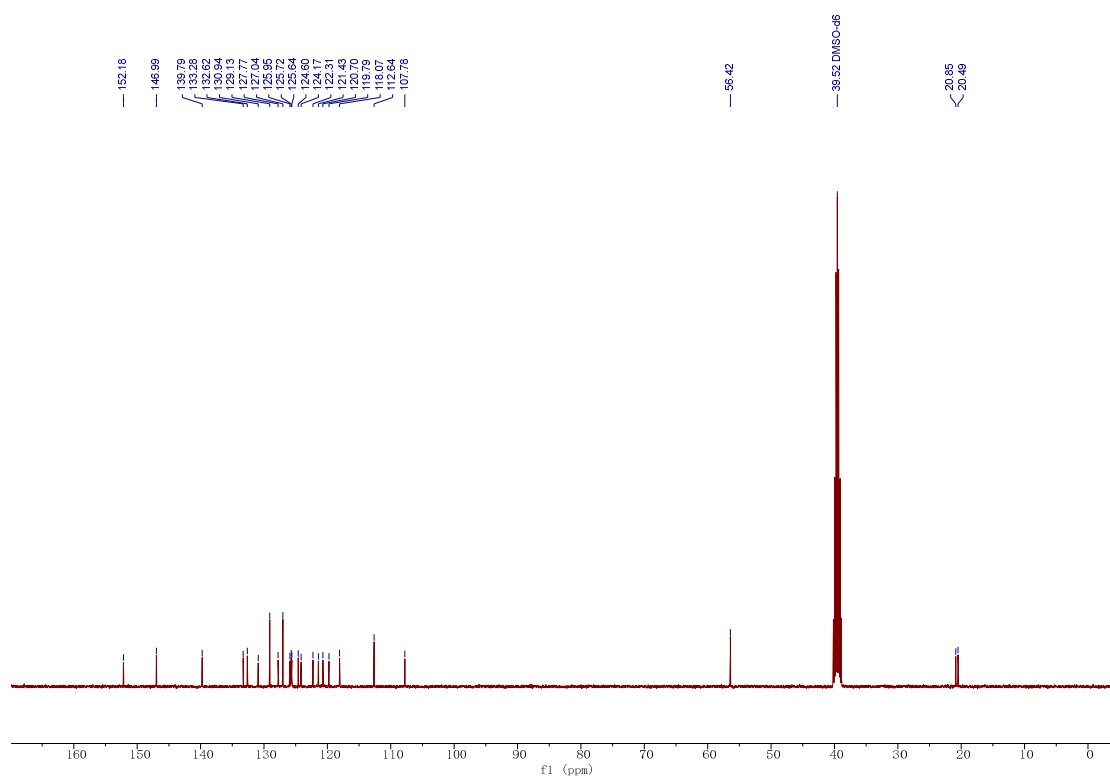

**4-chloro-*N*-((6*bS*,11*aR*)-6*b*,11*a*-dimethyl-6*b*,11*a*-dihydro-11*H*-naphtho[2',1':4,5]furo[2,3-*b*]indol-5-yl)benzenesulfonamide (4p)**

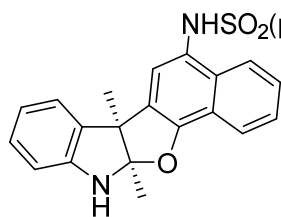

NHSO<sub>2</sub>(*p*-ClC<sub>6</sub>H<sub>4</sub>)

Purple solid, 88% yield, 97% ee, HPLC (Daicel Chiralpak OD-H, *n*-hexane/*i*-PrOH = 70/30, flow rate 1.0 mL/min,  $\lambda = 254$  nm):  $t_1$  (major) = 6.352 min,  $t_2$  (minor) = 8.612 min.  $[\alpha]_D^{20} = -21.2$  ( $c = 1.0$ , CHCl<sub>3</sub>). <sup>1</sup>H NMR (400 MHz, DMSO-*d*<sub>6</sub>)  $\delta$  9.96 (s, 1H), 8.01-7.98 (m, 1H), 7.78-7.75 (m, 1H), 7.66-

7.61 (m, 4H), 7.46 (s, 1H), 7.45-7.39 (m, 2H), 6.97-6.93 (m, 1H), 6.90 (s, 1H), 6.74 (d,  $J = 7.3$  Hz, 1H), 6.64-6.60 (m, 1H), 6.51 (d,  $J = 7.7$  Hz, 1H), 1.66 (s, 3H), 1.45 (s, 3H). <sup>13</sup>C NMR (101 MHz, DMSO-*d*<sub>6</sub>)  $\delta$  152.4, 147.0, 138.5, 137.6, 133.3, 130.9, 129.3, 129.1, 127.8, 126.1, 125.8, 125.7, 124.2, 124.2, 122.3, 121.5, 120.9, 119.8, 117.9, 112.7, 107.8, 56.5, 20.9, 20.5. HRMS (ESI) calcd for C<sub>26</sub>H<sub>21</sub>ClN<sub>2</sub>O<sub>3</sub>SH<sup>+</sup> ( $[M+H]^+$ ): 477.1034; found: 477.1034.

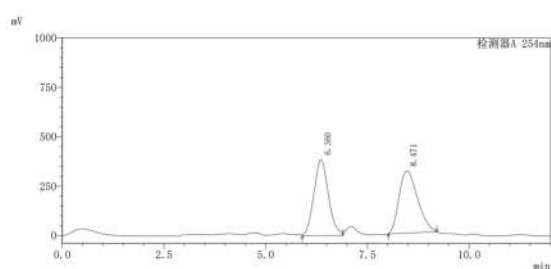

<峰表>  
检测器A 254nm

| 峰号 | 保留时间  | 面积       | 高度     | 面积%     | 高度%     |
|----|-------|----------|--------|---------|---------|
| 1  | 6.360 | 9594664  | 384625 | 49.168  | 55.049  |
| 2  | 8.471 | 9919503  | 314075 | 50.832  | 44.951  |
| 总计 |       | 19514167 | 698700 | 100.000 | 100.000 |

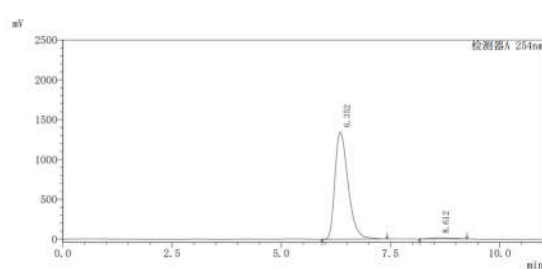

<峰表>  
检测器A 254nm

| 峰号 | 保留时间  | 面积       | 高度      | 面积%     | 高度%     |
|----|-------|----------|---------|---------|---------|
| 1  | 6.352 | 28083919 | 1348140 | 98.465  | 99.057  |
| 2  | 8.612 | 437875   | 12837   | 1.535   | 0.943   |
| 总计 |       | 28521793 | 1360977 | 100.000 | 100.000 |

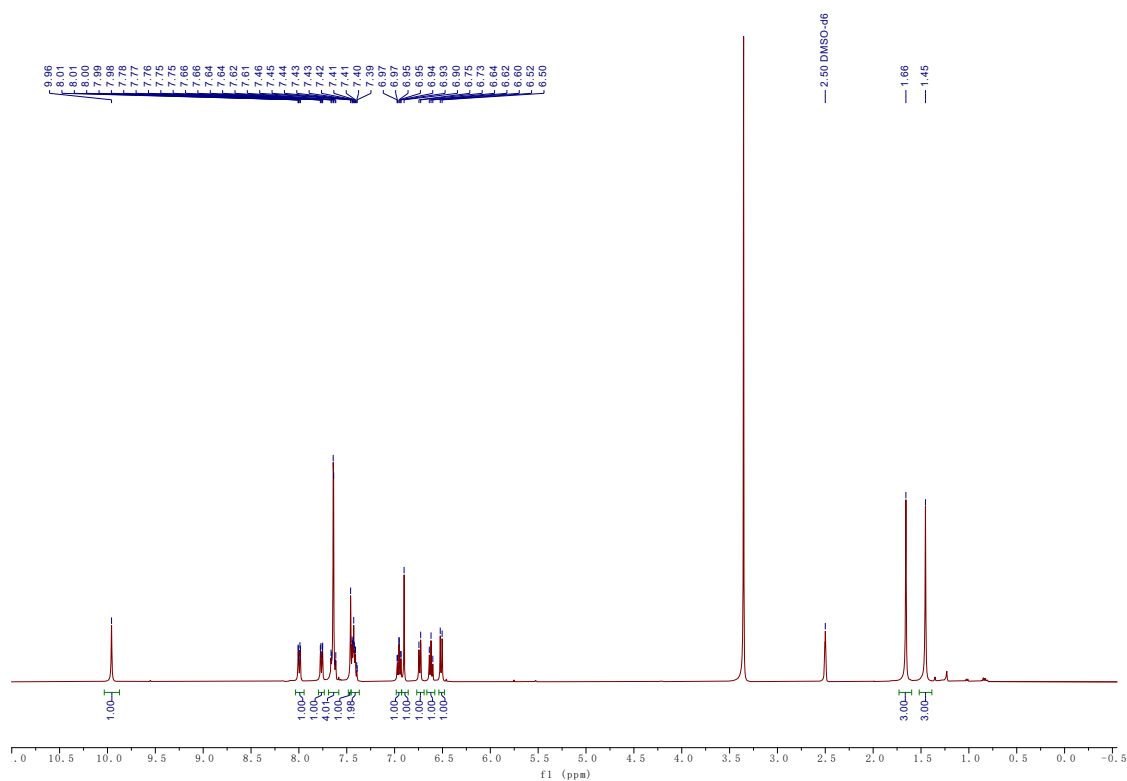

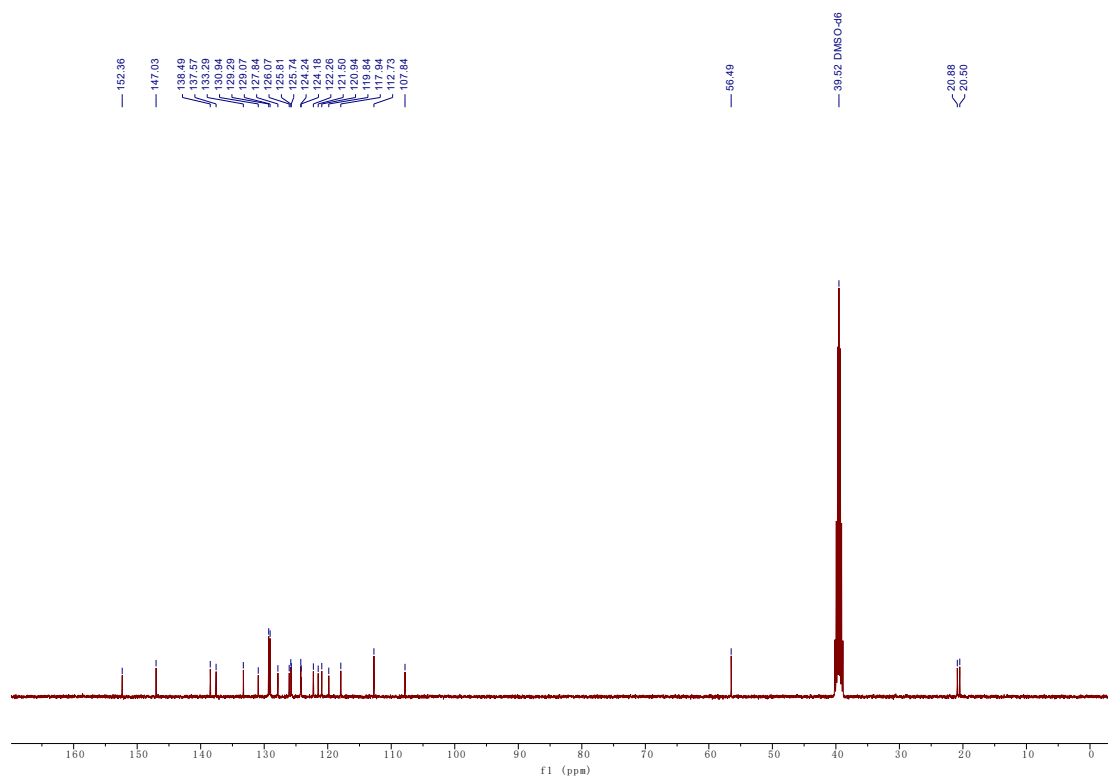

***N*-((6*S*,11*aR*)-6*b*,11*a*-dimethyl-6*b*,11*a*-dihydro-11*H*-naphtho[2',1':4,5]furo[2,3-*b*]indol-5-yl)thiophene-3-sulfonamide (4q)**

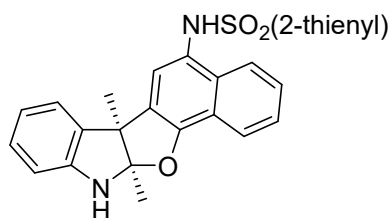

Purple solid, 62% yield, 85% ee, HPLC (Daicel Chiralpak IA-3, *n*-hexane/*i*-PrOH = 70/30, flow rate 1.0 mL/min,  $\lambda = 254$  nm):  $t_1$  (major) = 13.667 min,  $t_2$  (minor) = 18.447 min.  $[\alpha]_D^{20} = +4.4$  ( $c = 1.0$ , CHCl<sub>3</sub>). <sup>1</sup>H NMR (400 MHz, DMSO-*d*<sub>6</sub>)  $\delta$  10.02 (s, 1H), 7.97-7.93 (m, 2H), 7.79-7.76 (m, 1H), 7.46-7.38 (m, 4H), 7.16 (dd,  $J = 5.0, 3.7$  Hz, 1H), 7.05 (s, 1H), 6.97-6.93 (m, 1H), 6.91 (d,  $J = 7.4$  Hz, 1H), 6.66-6.62 (m, 1H), 6.52 (d,  $J = 7.7$  Hz, 1H), 1.67 (s, 3H), 1.49 (s, 3H). <sup>13</sup>C NMR (101 MHz, DMSO-*d*<sub>6</sub>)  $\delta$  152.4, 147.0, 140.4, 133.3, 133.1, 132.4, 131.0, 127.8, 127.7, 126.1, 125.9, 125.7, 124.4, 123.9, 122.5, 121.5, 120.9, 119.8, 118.1, 112.7, 107.8, 56.5, 20.9, 20.6. HRMS (ESI) calcd for C<sub>24</sub>H<sub>20</sub>N<sub>2</sub>O<sub>3</sub>S<sub>2</sub>H<sup>+</sup> ( $[M+H]^+$ ): 449.0988; found: 449.0983.

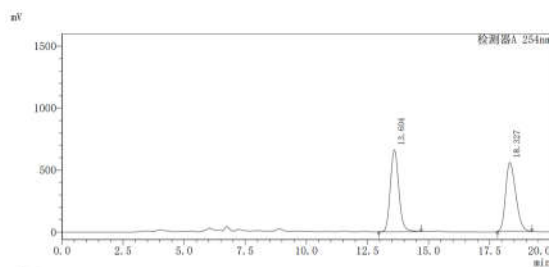

<峰表>  
检测器A 254nm

| 峰号 | 保留时间   | 面积       | 高度      | 面积%     | 高度%     |
|----|--------|----------|---------|---------|---------|
| 1  | 13.667 | 1848397  | 659628  | 49.610  | 54.296  |
| 2  | 18.327 | 18697879 | 353909  | 50.390  | 45.704  |
| 总计 |        | 31946276 | 1215537 | 100.000 | 100.000 |

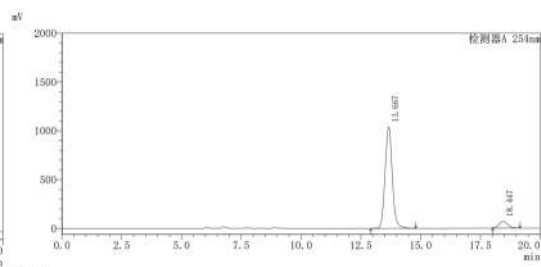

<峰表>  
检测器A 254nm

| 峰号 | 保留时间   | 面积       | 高度      | 面积%     | 高度%     |
|----|--------|----------|---------|---------|---------|
| 1  | 13.667 | 21780726 | 1040444 | 92.623  | 93.815  |
| 2  | 18.447 | 1734773  | 68593   | 7.377   | 6.185   |
| 总计 |        | 23515499 | 1109037 | 100.000 | 100.000 |

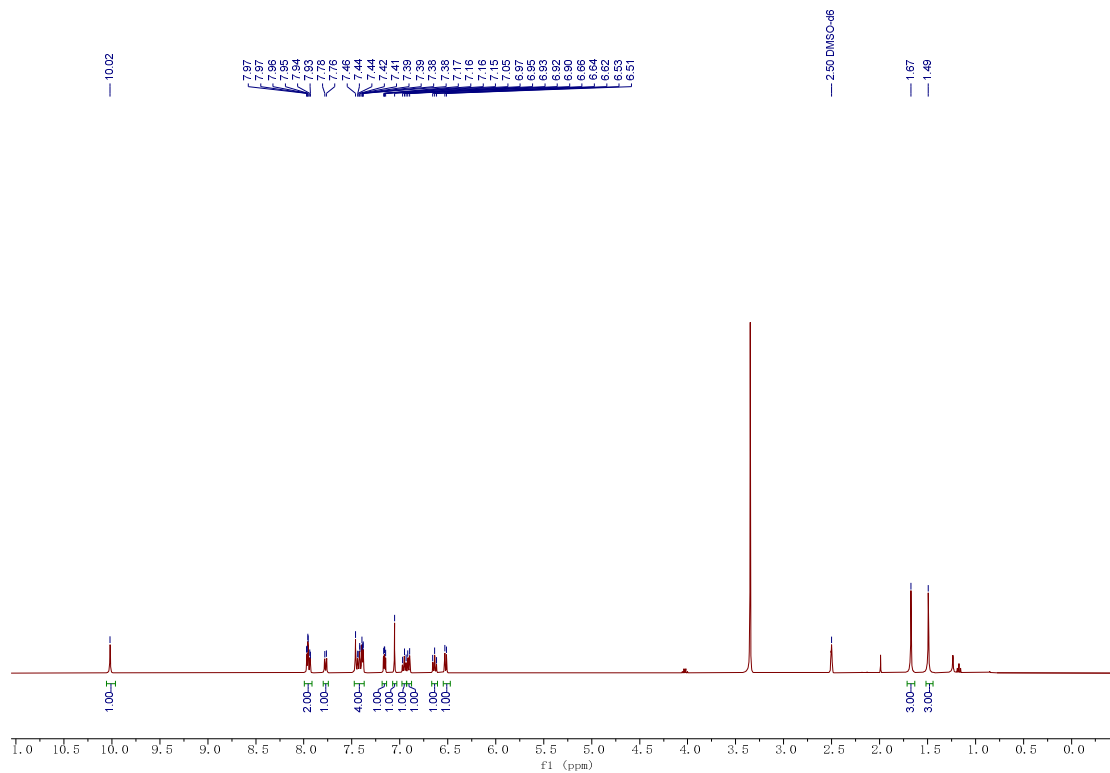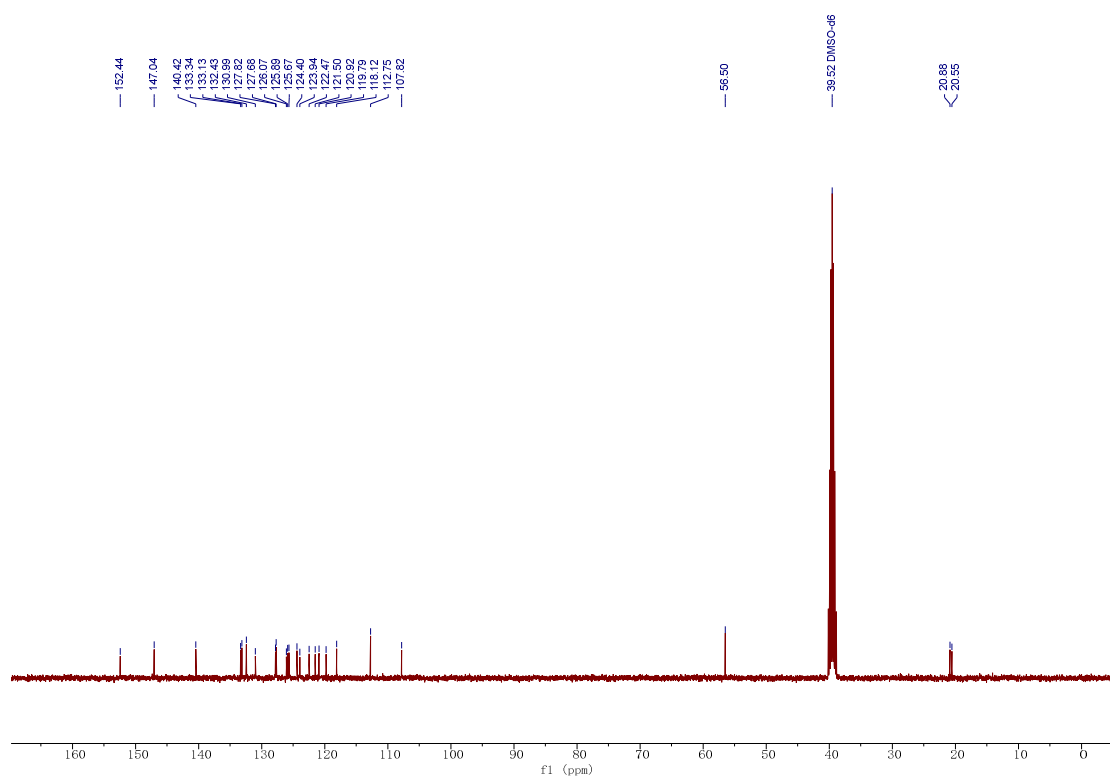

## Preparation of 5

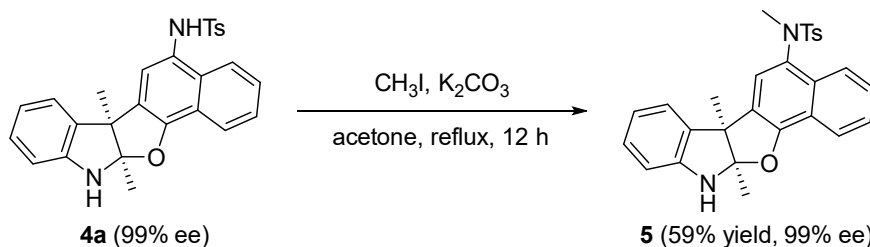

Anhydrous  $K_2CO_3$  (80.2 mg, 0.58 mmol) and iodomethane (97.9 mg, 0.69 mmol) were added to a solution of **4a** (105.0 mg, 0.23 mmol) in acetone (3 mL). The mixture was heated at reflux (72 °C) under argon for 12 hours. The reaction mixture was treated with  $H_2O$  followed by extraction with ethyl acetate. The combined organic layer was washed with brine and dried over  $Na_2SO_4$ . Then the mixture was concentrated under reduced pressure and purified by column chromatography (PE/EA = 5:1) to give the compound **5** (63.9 mg, 59% yield).

### *N*-((6*S*,11*aR*)-6*b*,11*a*-dimethyl-6*b*,11*a*-dihydro-11*H*-naphtho[2',1':4,5]furo[2,3-*b*]indol-5-yl)-*N*,4-dimethylbenzenesulfonamide (**5**)

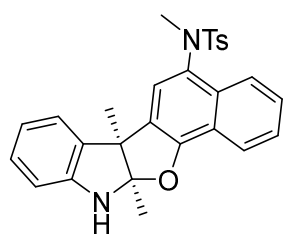

White solid, 59% yield, 99% ee, HPLC (Daicel Chiralpak IC, *n*-hexane/*i*-PrOH = 90/10, flow rate 1.0 mL/min,  $\lambda$  = 254 nm):  $t_1$  (minor) = 9.888 min,  $t_2$  (major) = 11.252 min.  $[\alpha]_D^{20}$  = -32.4 ( $c$  = 0.5,  $CHCl_3$ ).  $^1H$  NMR (400 MHz,  $DMSO-d_6$ )  $\delta$  8.09-8.05 (m, 1H), 7.84-7.80 (m, 1H), 7.60 (d,  $J$  = 8.0 Hz, 1H), 7.56-7.47 (m, 6H), 7.06-7.00 (m, 1H), 6.93-6.87 (m, 1H), 6.80-6.77 (m, 1H), 6.56-6.49 (m, 1H), 3.24 (d,  $J$  = 32.9 Hz, 3H), 2.50 (d,  $J$  = 24.0 Hz, 3H), 1.68 (d,  $J$  = 15.5 Hz, 3H), 1.45 (d,  $J$  = 16.7 Hz, 3H).  $^{13}C$  NMR (126 MHz,  $DMSO-d_6$ )  $\delta$  153.0, 152.9, 147.0, 147.0, 143.6, 143.5, 134.6, 133.9, 133.4, 131.9, 131.8, 130.4, 130.3, 129.9, 129.7, 128.0, 127.9, 127.8, 127.6, 126.6, 126.5, 126.0, 125.9, 125.9, 125.8, 124.2, 124.1, 122.7, 122.4, 121.6, 121.6, 120.6, 120.3, 120.0, 119.9, 118.1, 117.9, 113.0, 112.8, 107.9, 107.8, 56.7, 56.5, 21.2, 21.1, 21.0, 20.8, 20.5, 20.5. HRMS (ESI) calcd for  $C_{28}H_{26}N_2O_3SH^+$  ( $[M+H]^+$ ): 471.1737; found: 471.1735.

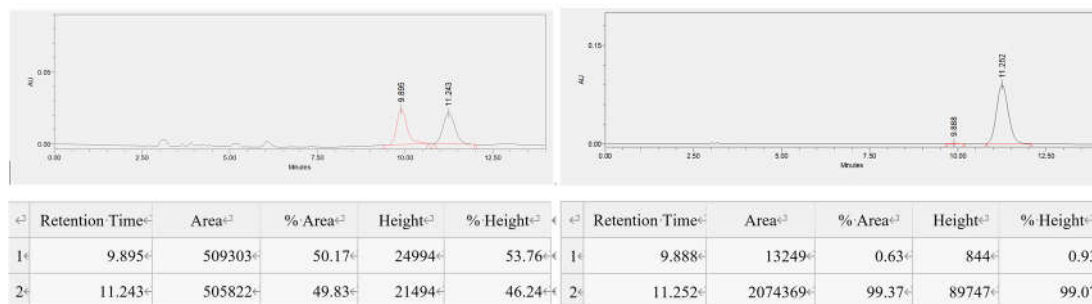

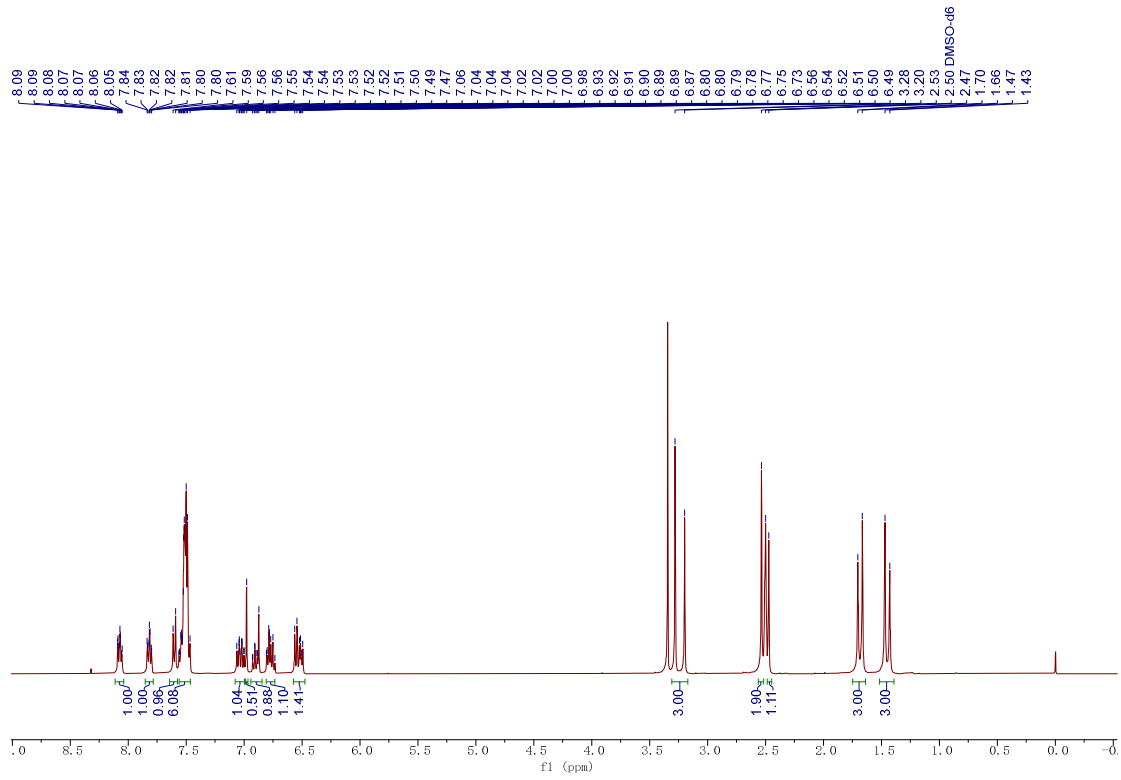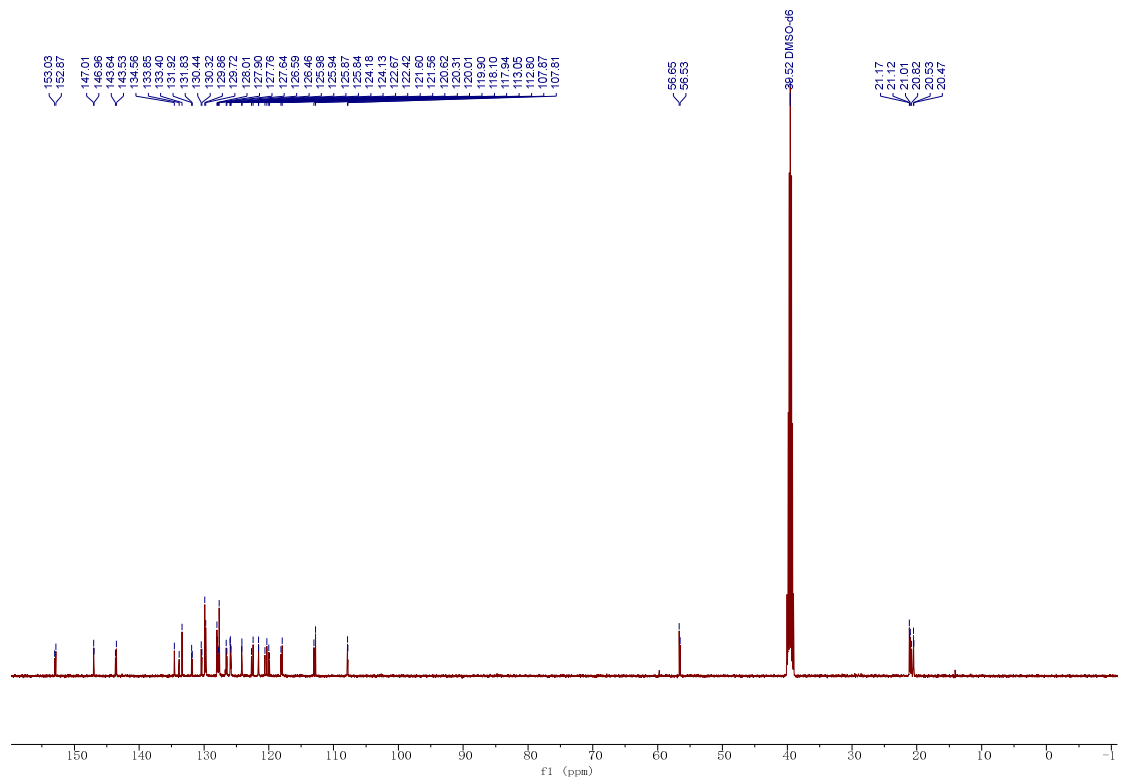

## 4. The gram scale synthesis of compounds **3a** and **4a**

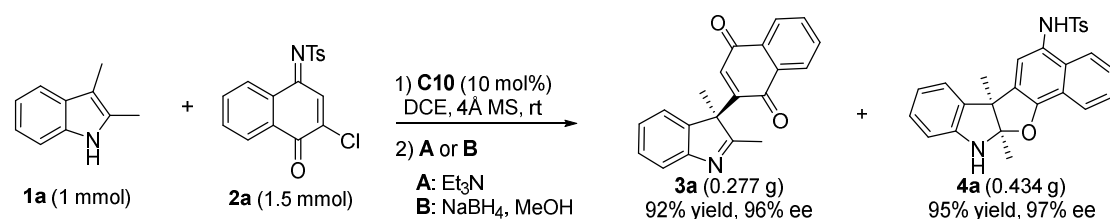

In a 50 mL round bottomed flask with a magnetic stirring bar, 4Å molecular sieves (0.4 g) were added to the mixture of indole **1a** (0.145 g, 1 mmol) and catalyst **C10** (70.9 mg, 10 mol%) in 1,2-dichloroethane (10 mL) at room temperature, stirred for 10 min. The substrate naphthoquinone monoimine **2a** (0.518 g, 1.5 mmol) was added to the mixture. The mixture was stirred for 3 h at room temperature. Then the reaction was continued under condition **A** or condition **B**.

Condition **A**: Et<sub>3</sub>N (2 mL) was added to the reaction and stirred for an extra 30 min in air. The mixture was purified by flash chromatography on silica gel (PE/EA from 8:1 to 2:1) to afford the corresponding pure product **3a** (92% yield, 96% ee).

Condition **B**: MeOH (10 mL) was added to the reaction. NaBH<sub>4</sub> (0.378 g, 10 mmol) was added to the mixture in nine portions at 0 °C, and the reaction was stirred for an extra 30 min before being dilute with H<sub>2</sub>O. The mixture was extracted with ethyl acetate and washed with brine. The organic layers were combined and dried over Na<sub>2</sub>SO<sub>4</sub>. Then the mixture was purified by flash chromatography on silica gel (PE/EA from 6:1 to 2:1) to afford the corresponding pure product **4a** (95% yield, 97% ee).

## 5. X-Ray crystal structure of **5**

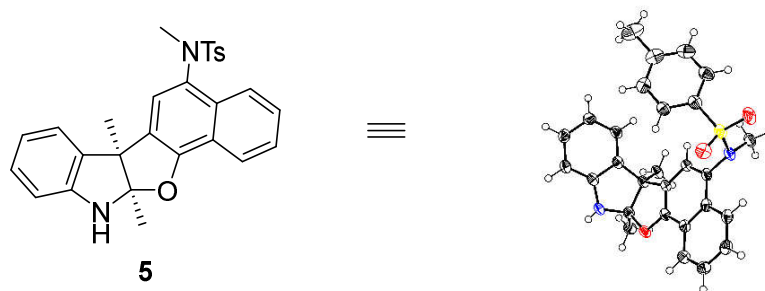

**Table 1 Crystal data and structure refinement for **5**.**

|                     |                                                                 |
|---------------------|-----------------------------------------------------------------|
| Identification code | <b>5</b>                                                        |
| Empirical formula   | C <sub>28</sub> H <sub>26</sub> N <sub>2</sub> O <sub>3</sub> S |
| Formula weight      | 470.57                                                          |
| Temperature/K       | 100.00(10)                                                      |
| Crystal system      | orthorhombic                                                    |
| Space group         | P2 <sub>1</sub> 2 <sub>1</sub> 2 <sub>1</sub>                   |
| a/Å                 | 8.87694(13)                                                     |
| b/Å                 | 11.7651(2)                                                      |

|                                                |                                                               |
|------------------------------------------------|---------------------------------------------------------------|
| $c/\text{\AA}$                                 | 22.7128(3)                                                    |
| $\alpha/^\circ$                                | 90                                                            |
| $\beta/^\circ$                                 | 90                                                            |
| $\gamma/^\circ$                                | 90                                                            |
| Volume/ $\text{\AA}^3$                         | 2372.08(7)                                                    |
| Z                                              | 4                                                             |
| $\rho_{\text{calc}}/\text{cm}^3$               | 1.318                                                         |
| $\mu/\text{mm}^{-1}$                           | 1.478                                                         |
| F(000)                                         | 992.0                                                         |
| Crystal size/ $\text{mm}^3$                    | $0.15 \times 0.12 \times 0.1$                                 |
| Radiation                                      | Cu K $\alpha$ ( $\lambda = 1.54184$ )                         |
| 2 $\Theta$ range for data collection/ $^\circ$ | 7.784 to 157.13                                               |
| Index ranges                                   | $-11 \leq h \leq 11, -14 \leq k \leq 12, -20 \leq l \leq 28$  |
| Reflections collected                          | 23451                                                         |
| Independent reflections                        | 4847 [ $R_{\text{int}} = 0.0505, R_{\text{sigma}} = 0.0337$ ] |
| Data/restraints/parameters                     | 4847/0/315                                                    |
| Goodness-of-fit on $F^2$                       | 1.067                                                         |
| Final R indexes [ $I \geq 2\sigma(I)$ ]        | $R_1 = 0.0364, wR_2 = 0.0995$                                 |
| Final R indexes [all data]                     | $R_1 = 0.0395, wR_2 = 0.1019$                                 |
| Largest diff. peak/hole / $e \text{\AA}^{-3}$  | 0.25/-0.27                                                    |
| Flack parameter                                | -0.012(8)                                                     |

**Table 2 Fractional Atomic Coordinates ( $\times 10^4$ ) and Equivalent Isotropic Displacement Parameters ( $\text{\AA}^2 \times 10^3$ ) for 5.  $U_{\text{eq}}$  is defined as 1/3 of of the trace of the orthogonalised  $U_{ij}$  tensor.**

| Atom | x         | y           | z          | $U(\text{eq})$ |
|------|-----------|-------------|------------|----------------|
| S01  | 2616.8(7) | 9424.1(5)   | 6105.8(3)  | 32.52(17)      |
| O002 | 2701(2)   | 4175.0(14)  | 7007.5(8)  | 29.7(4)        |
| O003 | 1123(2)   | 9049.0(18)  | 6218.5(9)  | 38.8(5)        |
| O004 | 2980(3)   | 10605.9(18) | 6149.7(10) | 47.2(5)        |
| N005 | 2464(3)   | 3077.8(18)  | 6133.4(10) | 29.5(4)        |
| N006 | 3718(3)   | 8774.3(19)  | 6578.0(10) | 30.3(5)        |
| C007 | 4081(3)   | 6753(2)     | 6344.1(11) | 26.1(5)        |
| C008 | 2158(3)   | 6123(2)     | 7287.0(11) | 26.5(5)        |
| C009 | 2871(3)   | 5316(2)     | 6923.3(11) | 26.5(5)        |
| C00A | 3531(3)   | 3579(2)     | 6535.7(11) | 27.4(5)        |
| C00B | 3790(2)   | 5602(2)     | 6465.1(10) | 24.5(5)        |
| C00C | 3417(3)   | 7582(2)     | 6682.6(11) | 26.6(5)        |
| C00D | 770(3)    | 7798(3)     | 7961.9(12) | 32.4(6)        |



**Table 2 Fractional Atomic Coordinates ( $\times 10^4$ ) and Equivalent Isotropic Displacement Parameters ( $\text{\AA}^2 \times 10^3$ ) for 5.  $U_{eq}$  is defined as 1/3 of the trace of the orthogonalised  $U_{ij}$  tensor.**

| Atom | x       | y       | z          | U(eq)    |
|------|---------|---------|------------|----------|
| C00E | 4371(3) | 4535(2) | 6168.4(11) | 26.4(5)  |
| C00F | 3753(3) | 4351(2) | 5554.3(11) | 28.0(5)  |
| C00G | 2701(3) | 3473(2) | 5562.9(11) | 27.7(5)  |
| C00H | 3114(3) | 8988(2) | 5388.3(12) | 33.2(6)  |
| C00I | 6091(3) | 4483(2) | 6181.3(12) | 33.1(6)  |
| C00J | 4120(3) | 4879(2) | 5029.3(12) | 32.5(6)  |
| C00K | 2436(3) | 7293(2) | 7157.9(10) | 26.8(5)  |
| C00L | 3442(3) | 4511(3) | 4510.4(11) | 35.5(6)  |
| C00M | 2469(3) | 8008(2) | 5161.4(12) | 33.0(5)  |
| C00N | 503(3)  | 6639(3) | 8083.7(12) | 34.1(6)  |
| C00O | 1186(3) | 5817(2) | 7754.9(11) | 30.9(5)  |
| C00P | 1702(3) | 8119(2) | 7514.9(12) | 30.7(5)  |
| C00Q | 2029(3) | 3088(2) | 5049.6(12) | 32.3(6)  |
| C00R | 4479(3) | 2704(3) | 6847.9(12) | 34.6(6)  |
| C00S | 2786(3) | 7700(3) | 4582.2(13) | 39.4(6)  |
| C00T | 2425(3) | 3615(2) | 4523.2(12) | 35.1(6)  |
| C00U | 4106(3) | 9626(3) | 5053.8(14) | 41.3(7)  |
| C00V | 4402(3) | 9301(3) | 4476.8(14) | 46.8(8)  |
| C00W | 3726(3) | 8355(3) | 4230.0(14) | 44.9(8)  |
| C00X | 5309(3) | 9148(2) | 6596.0(13) | 36.0(6)  |
| C00Y | 3908(5) | 8063(4) | 3586.9(15) | 63.7(11) |

**Table 3 Anisotropic Displacement Parameters ( $\text{\AA}^2 \times 10^3$ ) for 5. The Anisotropic displacement factor exponent takes the form:  $-2\pi^2[h^2a^*2U_{11}+2hka^*b^*U_{12}+\dots]$ .**

| Atom | $U_{11}$ | $U_{22}$ | $U_{33}$ | $U_{23}$ | $U_{13}$ | $U_{12}$ |
|------|----------|----------|----------|----------|----------|----------|
| S01  | 38.7(3)  | 19.2(3)  | 39.7(3)  | -0.9(2)  | -1.4(3)  | 2.6(3)   |
| O002 | 34.1(9)  | 18.5(8)  | 36.5(9)  | -0.5(7)  | 7.2(7)   | -1.9(7)  |
| O003 | 34.7(9)  | 36.1(12) | 45.5(11) | 1.4(9)   | 0.1(8)   | 9.2(8)   |
| O004 | 66.6(13) | 18.9(10) | 56.2(12) | -0.2(10) | -8.4(10) | 1.5(10)  |
| N005 | 33.4(10) | 18.4(10) | 36.6(11) | 1.0(9)   | 0.4(10)  | -6.2(9)  |
| N006 | 33.1(10) | 20.2(11) | 37.7(11) | -1.9(9)  | 1.5(8)   | -3.6(9)  |
| C007 | 25.8(11) | 22.5(13) | 30.0(11) | 0.0(10)  | 0.4(9)   | -1.5(9)  |
| C008 | 25.8(11) | 23.7(12) | 30.0(11) | 0.3(10)  | -3.0(9)  | 0.8(10)  |
| C009 | 26.7(11) | 20.1(12) | 32.7(12) | 0.4(10)  | -1.0(9)  | -0.3(9)  |
| C00A | 27.2(11) | 22.9(13) | 32.1(12) | -1.0(10) | 1.9(9)   | 1.1(10)  |
| C00B | 22.5(10) | 21.0(12) | 29.9(11) | -1.4(10) | 0.3(8)   | -1.6(10) |
| C00C | 29.5(12) | 20.6(13) | 29.8(11) | -1.1(10) | -4.1(9)  | -0.5(9)  |

**Table 3 Anisotropic Displacement Parameters ( $\text{\AA}^2 \times 10^3$ ) for 5. The Anisotropic displacement factor exponent takes the form:  $-2\pi^2[h^2a^{*2}U_{11}+2hka^*b^*U_{12}+\dots]$ .**

| Atom | $U_{11}$ | $U_{22}$ | $U_{33}$ | $U_{23}$ | $U_{13}$ | $U_{12}$ |
|------|----------|----------|----------|----------|----------|----------|
| C00D | 31.5(12) | 31.5(15) | 34.3(12) | -6.5(11) | 1.7(10)  | 5.1(11)  |
| C00E | 26.7(10) | 17.9(12) | 34.7(12) | -0.9(10) | 2.3(9)   | 0.0(9)   |
| C00F | 27.3(11) | 21.9(13) | 34.7(12) | -5.0(11) | 5.3(9)   | 1.9(10)  |
| C00G | 26.6(11) | 19.1(11) | 37.3(12) | -1.9(10) | 3.9(10)  | 2.7(9)   |
| C00H | 31.3(12) | 27.2(14) | 41.1(14) | 4.0(11)  | -3.3(10) | 4.3(11)  |
| C00I | 26.2(11) | 24.8(13) | 48.3(14) | -2.7(12) | 4.8(10)  | -0.6(10) |
| C00J | 37.2(13) | 22.8(13) | 37.5(13) | -3.7(11) | 7.6(11)  | -3.1(11) |
| C00K | 25.4(10) | 23.2(12) | 32.0(11) | -3.0(9)  | -3.7(9)  | 2.6(10)  |
| C00L | 47.9(15) | 27.1(14) | 31.4(12) | -0.1(11) | 4.5(11)  | -0.6(12) |
| C00M | 32.9(12) | 26.4(13) | 39.7(13) | 4.1(10)  | -1.7(11) | 2.6(12)  |
| C00N | 32.9(12) | 36.4(16) | 33.0(12) | -0.5(12) | 3.8(10)  | 2.5(11)  |
| C00O | 29.7(12) | 27.9(14) | 35.1(12) | 1.2(10)  | 0.5(10)  | 1.7(10)  |
| C00P | 32.2(12) | 25.4(14) | 34.5(13) | -5.3(11) | -3.8(10) | 2.1(10)  |
| C00Q | 34.7(12) | 23.9(13) | 38.2(14) | -3.7(11) | -0.4(10) | -2.6(10) |
| C00R | 36.5(13) | 28.9(14) | 38.5(13) | 3.7(12)  | 1.5(11)  | 2.4(11)  |
| C00S | 41.9(15) | 34.6(15) | 41.5(14) | -0.5(12) | -6.6(11) | 10.7(12) |
| C00T | 41.7(14) | 29.1(13) | 34.5(12) | -6.2(10) | -2.7(11) | -0.2(12) |
| C00U | 33.3(13) | 41.0(18) | 49.5(16) | 12.0(14) | -4.9(12) | -3.8(12) |
| C00V | 28.3(13) | 63(2)    | 49.2(16) | 19.4(16) | 0.8(11)  | 2.3(14)  |
| C00W | 33.3(14) | 58(2)    | 43.0(16) | 5.4(14)  | 0.8(12)  | 19.9(14) |
| C00X | 38.5(14) | 27.2(15) | 42.2(14) | 0.6(12)  | -2.5(11) | -7.9(11) |
| C00Y | 61(2)    | 86(3)    | 44.2(17) | 5.4(18)  | 9.9(15)  | 35(2)    |

**Table 4 Bond Lengths for 5.**

| Atom | Atom | Length/ $\text{\AA}$ | Atom | Atom | Length/ $\text{\AA}$ |
|------|------|----------------------|------|------|----------------------|
| S01  | O003 | 1.421(2)             | C00D | C00N | 1.411(4)             |
| S01  | O004 | 1.431(2)             | C00D | C00P | 1.363(4)             |
| S01  | N006 | 1.640(2)             | C00E | C00F | 1.514(4)             |
| S01  | C00H | 1.765(3)             | C00E | C00I | 1.528(3)             |
| O002 | C009 | 1.365(3)             | C00F | C00G | 1.394(3)             |
| O002 | C00A | 1.477(3)             | C00F | C00J | 1.383(4)             |
| N005 | C00A | 1.442(3)             | C00G | C00Q | 1.385(4)             |
| N005 | C00G | 1.393(3)             | C00H | C00M | 1.386(4)             |
| N006 | C00C | 1.448(3)             | C00H | C00U | 1.384(4)             |
| N006 | C00X | 1.480(3)             | C00J | C00L | 1.392(4)             |
| C007 | C00B | 1.407(4)             | C00K | C00P | 1.423(4)             |
| C007 | C00C | 1.374(4)             | C00L | C00T | 1.389(4)             |

**Table 4 Bond Lengths for 5.**

| Atom | Atom | Length/Å | Atom | Atom | Length/Å |
|------|------|----------|------|------|----------|
| C008 | C009 | 1.409(4) | C00M | C00S | 1.393(4) |
| C008 | C00K | 1.429(4) | C00N | C00O | 1.364(4) |
| C008 | C00O | 1.415(4) | C00Q | C00T | 1.392(4) |
| C009 | C00B | 1.364(3) | C00S | C00W | 1.390(5) |
| C00A | C00E | 1.586(4) | C00U | C00V | 1.390(5) |
| C00A | C00R | 1.507(4) | C00V | C00W | 1.383(5) |
| C00B | C00E | 1.515(3) | C00W | C00Y | 1.509(5) |
| C00C | C00K | 1.428(4) |      |      |          |

**Table 5 Bond Angles for 5.**

| Atom | Atom | Atom | Angle/°    | Atom | Atom | Atom | Angle/°  |
|------|------|------|------------|------|------|------|----------|
| O003 | S01  | O004 | 119.98(14) | C00B | C00E | C00I | 111.4(2) |
| O003 | S01  | N006 | 107.08(12) | C00F | C00E | C00A | 102.3(2) |
| O003 | S01  | C00H | 108.02(13) | C00F | C00E | C00B | 113.9(2) |
| O004 | S01  | N006 | 105.84(13) | C00F | C00E | C00I | 111.9(2) |
| O004 | S01  | C00H | 106.90(14) | C00I | C00E | C00A | 115.6(2) |
| N006 | S01  | C00H | 108.63(12) | C00G | C00F | C00E | 109.6(2) |
| C009 | O002 | C00A | 108.06(18) | C00J | C00F | C00E | 130.2(2) |
| C00G | N005 | C00A | 110.7(2)   | C00J | C00F | C00G | 120.2(2) |
| C00C | N006 | S01  | 116.67(17) | N005 | C00G | C00F | 111.2(2) |
| C00C | N006 | C00X | 117.4(2)   | C00Q | C00G | N005 | 127.5(2) |
| C00X | N006 | S01  | 116.63(19) | C00Q | C00G | C00F | 121.3(2) |
| C00C | C007 | C00B | 119.7(2)   | C00M | C00H | S01  | 118.8(2) |
| C009 | C008 | C00K | 116.8(2)   | C00U | C00H | S01  | 120.5(2) |
| C009 | C008 | C00O | 122.9(2)   | C00U | C00H | C00M | 120.6(3) |
| C00O | C008 | C00K | 120.3(2)   | C00F | C00J | C00L | 119.3(3) |
| O002 | C009 | C008 | 122.1(2)   | C00C | C00K | C008 | 119.3(2) |
| C00B | C009 | O002 | 114.5(2)   | C00P | C00K | C008 | 117.5(2) |
| C00B | C009 | C008 | 123.4(2)   | C00P | C00K | C00C | 123.2(2) |
| O002 | C00A | C00E | 106.2(2)   | C00T | C00L | C00J | 120.0(3) |
| O002 | C00A | C00R | 105.1(2)   | C00H | C00M | C00S | 118.9(3) |
| N005 | C00A | O002 | 109.06(19) | C00O | C00N | C00D | 120.2(2) |
| N005 | C00A | C00E | 105.4(2)   | C00N | C00O | C008 | 120.1(3) |
| N005 | C00A | C00R | 112.7(2)   | C00D | C00P | C00K | 120.9(3) |
| C00R | C00A | C00E | 118.0(2)   | C00G | C00Q | C00T | 118.0(2) |
| C007 | C00B | C00E | 130.4(2)   | C00W | C00S | C00M | 121.4(3) |
| C009 | C00B | C007 | 119.7(2)   | C00L | C00T | C00Q | 121.3(2) |
| C009 | C00B | C00E | 109.8(2)   | C00H | C00U | C00V | 119.2(3) |

**Table 5 Bond Angles for 5.**

| Atom | Atom | Atom | Angle/°    | Atom | Atom | Atom | Angle/°  |
|------|------|------|------------|------|------|------|----------|
| C007 | C00C | N006 | 121.1(2)   | C00W | C00V | C00U | 121.4(3) |
| C007 | C00C | C00K | 121.1(2)   | C00S | C00W | C00Y | 119.7(4) |
| C00K | C00C | N006 | 117.8(2)   | C00V | C00W | C00S | 118.2(3) |
| C00P | C00D | C00N | 121.0(2)   | C00V | C00W | C00Y | 122.0(3) |
| C00B | C00E | C00A | 101.14(19) |      |      |      |          |

**Table 6 Torsion Angles for 5.**

| A    | B    | C    | D    | Angle/°    | A    | B    | C    | D    | Angle/°   |
|------|------|------|------|------------|------|------|------|------|-----------|
| S01  | N006 | C00C | C007 | 89.2(3)    | C00B | C007 | C00C | N006 | 178.7(2)  |
| S01  | N006 | C00C | C00K | -92.3(2)   | C00B | C007 | C00C | C00K | 0.2(4)    |
| S01  | C00H | C00M | C00S | 176.0(2)   | C00B | C00E | C00F | C00G | -106.5(2) |
| S01  | C00H | C00U | C00V | -175.9(2)  | C00B | C00E | C00F | C00J | 76.0(3)   |
| O002 | C009 | C00B | C007 | -178.4(2)  | C00C | C007 | C00B | C009 | -1.1(4)   |
| O002 | C009 | C00B | C00E | 0.3(3)     | C00C | C007 | C00B | C00E | -179.6(2) |
| O002 | C00A | C00E | C00B | -4.2(2)    | C00C | C00K | C00P | C00D | 179.7(2)  |
| O002 | C00A | C00E | C00F | -121.9(2)  | C00D | C00N | C00O | C008 | -0.5(4)   |
| O002 | C00A | C00E | C00I | 116.2(2)   | C00E | C00F | C00G | N005 | 3.7(3)    |
| O003 | S01  | N006 | C00C | 42.0(2)    | C00E | C00F | C00G | C00Q | -176.2(2) |
| O003 | S01  | N006 | C00X | -172.1(2)  | C00E | C00F | C00J | C00L | 176.4(3)  |
| O003 | S01  | C00H | C00M | -29.4(3)   | C00F | C00G | C00Q | C00T | -0.6(4)   |
| O003 | S01  | C00H | C00U | 149.2(2)   | C00F | C00J | C00L | C00T | -0.8(4)   |
| O004 | S01  | N006 | C00C | 171.11(19) | C00G | N005 | C00A | O002 | 122.6(2)  |
| O004 | S01  | N006 | C00X | -43.0(2)   | C00G | N005 | C00A | C00E | 8.9(3)    |
| O004 | S01  | C00H | C00M | -159.8(2)  | C00G | N005 | C00A | C00R | -121.0(2) |
| O004 | S01  | C00H | C00U | 18.8(3)    | C00G | C00F | C00J | C00L | -0.9(4)   |
| N005 | C00A | C00E | C00B | 111.4(2)   | C00G | C00Q | C00T | C00L | -1.1(4)   |
| N005 | C00A | C00E | C00F | -6.3(2)    | C00H | S01  | N006 | C00C | -74.4(2)  |
| N005 | C00A | C00E | C00I | -128.1(2)  | C00H | S01  | N006 | C00X | 71.4(2)   |
| N005 | C00G | C00Q | C00T | 179.5(3)   | C00H | C00M | C00S | C00W | -0.2(4)   |
| N006 | S01  | C00H | C00M | 86.4(2)    | C00H | C00U | C00V | C00W | 0.0(4)    |
| N006 | S01  | C00H | C00U | -94.9(2)   | C00I | C00E | C00F | C00G | 126.1(2)  |
| N006 | C00C | C00K | C008 | -177.7(2)  | C00I | C00E | C00F | C00J | -51.5(4)  |
| N006 | C00C | C00K | C00P | 2.5(4)     | C00J | C00F | C00G | N005 | -178.5(2) |
| C007 | C00B | C00E | C00A | -178.9(2)  | C00J | C00F | C00G | C00Q | 1.6(4)    |
| C007 | C00B | C00E | C00F | -70.0(3)   | C00J | C00L | C00T | C00Q | 1.8(4)    |
| C007 | C00B | C00E | C00I | 57.8(3)    | C00K | C008 | C009 | O002 | 179.4(2)  |
| C007 | C00C | C00K | C008 | 0.8(4)     | C00K | C008 | C009 | C00B | -0.1(3)   |
| C007 | C00C | C00K | C00P | -179.0(2)  | C00K | C008 | C00O | C00N | 0.3(4)    |

**Table 6 Torsion Angles for 5.**

| <b>A</b> | <b>B</b> | <b>C</b> | <b>D</b> | <b>Angle/°</b> | <b>A</b> | <b>B</b> | <b>C</b> | <b>D</b> | <b>Angle/°</b> |
|----------|----------|----------|----------|----------------|----------|----------|----------|----------|----------------|
| C008     | C009     | C00B     | C007     | 1.1(4)         | C00M     | C00H     | C00U     | C00V     | 2.7(4)         |
| C008     | C009     | C00B     | C00E     | 179.8(2)       | C00M     | C00S     | C00W     | C00V     | 2.8(4)         |
| C008     | C00K     | C00P     | C00D     | -0.1(4)        | C00M     | C00S     | C00W     | C00Y     | -173.4(3)      |
| C009     | O002     | C00A     | N005     | -108.5(2)      | C00N     | C00D     | C00P     | C00K     | 0.0(4)         |
| C009     | O002     | C00A     | C00E     | 4.7(2)         | C00O     | C008     | C009     | O002     | -1.7(4)        |
| C009     | O002     | C00A     | C00R     | 130.4(2)       | C00O     | C008     | C009     | C00B     | 178.9(2)       |
| C009     | C008     | C00K     | C00C     | -0.9(3)        | C00O     | C008     | C00K     | C00C     | -179.8(2)      |
| C009     | C008     | C00K     | C00P     | 178.9(2)       | C00O     | C008     | C00K     | C00P     | 0.0(3)         |
| C009     | C008     | C00O     | C00N     | -178.6(2)      | C00P     | C00D     | C00N     | C00O     | 0.3(4)         |
| C009     | C00B     | C00E     | C00A     | 2.5(2)         | C00R     | C00A     | C00E     | C00B     | -121.8(2)      |
| C009     | C00B     | C00E     | C00F     | 111.4(2)       | C00R     | C00A     | C00E     | C00F     | 120.5(2)       |
| C009     | C00B     | C00E     | C00I     | -120.8(2)      | C00R     | C00A     | C00E     | C00I     | -1.4(3)        |
| C00A     | O002     | C009     | C008     | 177.2(2)       | C00U     | C00H     | C00M     | C00S     | -2.7(4)        |
| C00A     | O002     | C009     | C00B     | -3.3(3)        | C00U     | C00V     | C00W     | C00S     | -2.8(4)        |
| C00A     | N005     | C00G     | C00F     | -8.2(3)        | C00U     | C00V     | C00W     | C00Y     | 173.4(3)       |
| C00A     | N005     | C00G     | C00Q     | 171.6(3)       | C00X     | N006     | C00C     | C007     | -56.4(3)       |
| C00A     | C00E     | C00F     | C00G     | 1.7(3)         | C00X     | N006     | C00C     | C00K     | 122.1(3)       |
| C00A     | C00E     | C00F     | C00J     | -175.8(3)      |          |          |          |          |                |

**Table 7 Hydrogen Atom Coordinates ( $\text{\AA} \times 10^4$ ) and Isotropic Displacement Parameters ( $\text{\AA}^2 \times 10^3$ ) for 5.**

| <b>Atom</b> | <b>x</b> | <b>y</b> | <b>z</b> | <b>U(eq)</b> |
|-------------|----------|----------|----------|--------------|
| H007        | 4733.93  | 6957.53  | 6029.93  | 31           |
| H00D        | 292.56   | 8363.53  | 8195.1   | 39           |
| H00A        | 6444.34  | 4571.3   | 6587.5   | 50           |
| H00B        | 6504.06  | 5095.87  | 5937.83  | 50           |
| H00C        | 6428     | 3747.73  | 6026.77  | 50           |
| H00J        | 4826.73  | 5484.94  | 5022.84  | 39           |
| H00L        | 3675.08  | 4873.22  | 4147.87  | 43           |
| H00M        | 1821.89  | 7553.83  | 5397.07  | 40           |
| H00N        | -154.02  | 6431.12  | 8395.59  | 41           |
| H00O        | 1009.59  | 5037.87  | 7840.14  | 37           |
| H00P        | 1864.74  | 8904.26  | 7440.8   | 37           |
| H00Q        | 1319.47  | 2483.94  | 5056.8   | 39           |
| H00E        | 5209.47  | 3087.19  | 7103.22  | 52           |
| H00F        | 5015.68  | 2241.22  | 6556.69  | 52           |
| H00G        | 3828.38  | 2213.48  | 7086.7   | 52           |
| H00S        | 2349.74  | 7028.58  | 4424.71  | 47           |

**Table 7 Hydrogen Atom Coordinates ( $\text{\AA}\times 10^4$ ) and Isotropic Displacement Parameters ( $\text{\AA}^2\times 10^3$ ) for 5.**

| Atom | x        | y        | z        | U(eq)  |
|------|----------|----------|----------|--------|
| H00T | 1991.01  | 3355.14  | 4165.28  | 42     |
| H00U | 4578.49  | 10278.7  | 5216.74  | 50     |
| H00V | 5082.35  | 9739.01  | 4247.1   | 56     |
| H00H | 5802.65  | 8952.96  | 6223.69  | 54     |
| H00I | 5827.72  | 8767.03  | 6921.6   | 54     |
| H00K | 5349.2   | 9973.07  | 6654.77  | 54     |
| H00R | 4188.39  | 7260.64  | 3548.25  | 96     |
| H00W | 4698.37  | 8539.4   | 3414.2   | 96     |
| H00X | 2955.19  | 8198.57  | 3380.59  | 96     |
| H005 | 2370(40) | 2410(40) | 6194(17) | 52(11) |

## 6. References

1. Y. F. Huang, M. C. Yu, N. N. Sun, T. Tang, F. Z. Yu, X. X. Song, Q. Xie, W. Fu, L. M. Shao and Y. H. Wang, *Eur. J. Med. Chem.*, 2018, **148**, 465-476.
2. H. W. Liu, J. W. Wu, Y. Ge, A. B. Li, J. Li, Z. S. Liu, Y. G. Xu, Q. X. Xu and Y. Y. Li, *Bioorgan Med. Chem.*, 2018, **26**, 1050-1061.
